# Supplementary material for: Genetic effects on chromatin accessibility uncover mechanisms of liver gene regulation and quantitative traits
Source: HighWire-hosted journal article supplement (doi:10.1101/gr.279741.124), 2025-05-20
Supplement: Supplemental_Tables.xlsx [file Supplemental_Tables.xlsx]

## Sheet: Table ofContents
Table	Contents
Supplemental Table 1	Donor characteristics and genotype principal components
Supplemental Table 2	ATAC metrics for individual libraries
Supplemental Table 3	ATAC metrics after merging libraries per donor
Supplemental Table 4A	Number of unique caPeaks identified using different numbers of ATAC PCs as covariates
Supplemental Table 4B	Correlations of ATAC PCs with phenotypes and technical factors
Supplemental Table 5	Replication of caQTLs from a 20-donor pilot liver study
Supplemental Table 6	Percentage of caPeaks and non-caPeaks assigned to Roadmap liver tissue chromatin states
Supplemental Table 7A	Number of significant caQTLs (FDR<5%) after downsampling sequencing depth
Supplemental Table 7B	Number of significant caQTLs (FDR<5%) after downsampling sample size
Supplemental Table 8	Motifs more often disrupted by caQTL variants compared to non-caQTL variants
Supplemental Table 9A	Coordinated caPeaks with predicted driver peaks and caPeak-gene links by coordination
Supplemental Table 9B	Descriptions of columns in Table S9A
Supplemental Table 10	Frequency of the number of caPeaks across coordinated caPeak sets
Supplemental Table 11	Quantiles of the genomic width in basepairs of the coordinated caPeak sets
Supplemental Table 12	Enrichment of liver tissue transcription factor ChIP-seq peaks in driver and response peaks
Supplemental Table 13	Enrichment of transcription factor motifs in driver peaks relative to response peaks
Supplemental Table 14	caPeak-gene links identified using TSS proximity
Supplemental Table 15	caPeak-gene links identified by caQTL colocalization with GTEx liver tissue eQTLs
Supplemental Table 16	caPeak-gene links identified from promoter capture HiC
Supplemental Table 17	caPeak-gene links identified by at least one method, annotated with transcription factor genes, drug response genes, and tissue specificity
Supplemental Table 18	Tissue specificity of caPeak target genes compared to all genes detected in the Protein Atlas
Supplemental Table 19	Links between peaks and TFs supported by each of the peak-gene linking methods
Supplemental Table 20	Distribution of distances between peaks and TSS for peaks linked to TF and non-TF genes
Supplemental Table 21	Coordinated caQTLs and non-coordinated caQTLs that colocalize with liver tissue eQTLs
Supplemental Table 22	Stratified LD score regression using caPeaks from the 1kb analysis on 703 traits
Supplemental Table 23A	GWAS-caQTL colocalization results using caQTL from the 1kb analysis
Supplemental Table 23B	Descriptions of columns in Table S23A
Supplemental Table 24	GWAS signals for each trait that are colocalized with caQTLs, eQTLs, or both
Supplemental Table 25	Primers for transcriptional reporter assays
Supplemental Table 26	GuideRNA primers for CRISPR interference assays

## Sheet: S1 donorInfo_genoPCs
Supplemental Table 1. Donor characteristics and genotype principal components (PCs). SJLB_ID is the de-identified ID of the donor. GEO_ID is the ID of the published genotype samples from the Gene Expression Omnibus. Sex was determined from genotypes. BMI: body mass index. Genetic similarity to 1000G super populations was determined using two different approaches: (1) weighted K nearest neighbors …
SJLB_ID	GEO_ID	age_years	sex_genotypes	height_inches	weight_lbs	BMI	geneticSimilarity_WKNN_k4	geneticSimilarity_SVM	CS_geno_PC1	CS_geno_PC2	CS_geno_PC3	CS_geno_PC4	CS_geno_PC5	CS_geno_PC6	CS_geno_PC7	CS_geno_PC8	CS_geno_PC9	CS_geno_PC10	CS_1000G_geno_PC1	CS_1000G_geno_PC2	CS_1000G_geno_PC3	CS_1000G_geno_PC4	CS_1000G_geno_PC5	CS_1000G_geno_PC6	CS_1000G_geno_PC7	CS_1000G_geno_PC8	CS_1000G_geno_PC9	CS_1000G_geno_PC10
1	GSM640692	2	male	NA	26	NA	AFR	AFR	0.246615	0.0299799	-0.1651	-0.090948	-0.0281333	0.126569	0.207816	-0.0190479	-0.0739089	-0.296133	0.0292121	-0.000901449	0.00229244	0.00171784	-0.00267074	-0.00773326	0.00134755	-0.0283749	-0.0350512	-0.00217615
39	GSM640694	56	male	NA	NA	NA	EUR	EUR	-0.0341511	0.0710975	0.0520297	-0.0419472	-0.00371654	-0.0562106	0.0831043	0.0657303	-0.0409937	0.0158902	-0.0112294	0.0250358	0.0105097	0.0148702	-0.00595041	-0.00686803	-0.00714767	-0.0257047	-0.0572809	0.00554024
122	GSM640699	67	male	NA	NA	NA	AMR	SAS	-0.0161608	0.0212397	-0.0691933	-0.0369554	0.0442852	-0.153657	-0.0338906	-0.045914	0.183636	0.108027	-0.0123322	0.0106698	0.00958138	0.01486	-0.00274281	-0.0102818	-0.000999296	-0.020312	-0.0665982	0.013474
151	GSM640700	32	male	66	146	23.56	AFR	AFR	0.201949	0.0264071	0.486734	-0.368655	-0.114152	0.390116	-0.255962	-0.0290906	-0.0367696	-0.210246	0.0229127	0.00358475	0.00391129	0.00418532	-0.00339119	-0.00664513	-0.000776798	-0.0260789	-0.0467092	0.0039099
152	GSM640701	40	female	64	173	29.69	EUR	EUR	-0.0369547	0.0380103	-0.0167424	-0.0222187	-0.00552522	-0.0113614	0.0127332	0.0440318	0.0213545	0.0512373	-0.0112647	0.0254519	0.0108358	0.017448	-0.00800292	-0.0147052	-0.00101339	-0.027795	-0.0670251	-0.00022303
156	GSM640702	20	male	NA	NA	NA	EUR	EUR	-0.0342722	0.0650923	0.0360777	0.0226963	0.0288784	-0.00202855	-0.0386401	-0.00625338	-0.00287465	-0.0325074	-0.0107266	0.0258003	0.010241	0.0156907	-0.00495068	-0.0133374	0.00021892	-0.0239295	-0.0639902	0.00108673
162	GSM640704	18	male	NA	NA	NA	EUR	EUR	-0.0315225	0.0281141	-0.0282623	0.0107507	0.0209895	-0.0197455	0.0323173	-0.0132266	-0.00484937	0.0646454	-0.0106756	0.0252968	0.00987587	0.0152838	-0.000523755	-0.0072841	0.00351266	-0.0206609	-0.059308	0.000976776
172	GSM640705	16	male	67	146	22.86	EUR	EUR	-0.0299705	-0.0380925	0.00683058	0.0269697	0.0130935	0.0128716	0.0191945	0.0519383	-0.146815	-0.0158881	-0.0105425	0.0254352	0.0083118	0.0160779	-0.000258296	-0.000794554	-0.0033634	-0.0189418	-0.0488929	-0.00279251
174	GSM640706	23	female	65	115	19.13	EUR	EUR	-0.0342983	0.0108696	0.0125008	-0.0235952	0.00901841	-0.0123495	0.0408852	0.0798966	-0.0178375	-0.0771091	-0.0110208	0.0252902	0.0109039	0.0151364	-0.00210223	-0.00646296	0.00350125	-0.023807	-0.0668014	0.00538463
175	GSM640707	32	male	NA	NA	NA	EUR	EUR	-0.0343075	0.0305726	0.035403	0.0174175	-0.0263855	-0.00165641	0.018951	0.0110501	0.0428322	0.032337	-0.0110089	0.0253008	0.0103966	0.0155714	-0.00779763	-0.00981022	-0.00445145	-0.029681	-0.0644685	0.00545083
177	GSM640708	39	male	NA	NA	NA	AFR	AFR	0.225601	0.00460522	0.100785	0.0573785	0.246582	-0.0343427	0.000378002	-0.197614	0.355598	-0.161743	0.0257504	-0.00025522	0.00372876	0.00195677	-0.000255283	-0.00592843	9.71249e-05	-0.0248532	-0.0433879	0.00389435
200	GSM640709	2	female	28	18	16.14	EUR	EUR	-0.0313923	-0.0665225	-0.0343801	0.0140733	0.0152908	0.0879289	0.0624753	0.0692293	0.0175998	0.0156284	-0.0109124	0.0246291	0.00876525	0.015896	0.00308682	0.00212498	-9.6746e-05	-0.0222463	-0.0556971	0.000756675
201	GSM640710	6	male	42	37	14.75	EUR	EUR	-0.0324438	0.0153211	0.0378649	-0.0115114	0.0162899	-0.00522317	0.000505143	-0.0307803	-0.0484671	0.00656664	-0.0109166	0.0248567	0.00901305	0.0148183	-0.00956096	-0.0113525	0.00377829	-0.0227466	-0.0525771	0.00771693
204	GSM640712	8	female	48	43	13.12	EUR	EUR	-0.033742	0.0273551	0.0053863	0.0222971	0.00688794	-0.0055692	0.00903149	-0.0515319	0.0220042	0.0941418	-0.0110496	0.0248584	0.00992988	0.0143891	-0.00841665	-0.0134673	0.00582915	-0.0231286	-0.0577443	0.00482768
217	GSM640714	20	male	70	185	26.54	EUR	EUR	-0.0346722	-0.00465499	0.00628536	-0.0182467	-0.012433	0.0529876	-0.0150521	0.0632538	-0.00402581	-0.00458276	-0.0110355	0.0246839	0.0103417	0.0152091	-0.0105228	-0.0122365	-0.00124147	-0.0207747	-0.0550675	0.00736857
221	GSM640716	16	male	72	184	24.95	EUR	EUR	-0.0364913	0.0467845	-0.0173778	0.0329789	-0.0447296	-0.0298414	-0.014165	-0.0207989	-0.0459555	-0.0290098	-0.0110992	0.0263614	0.00888994	0.0151758	-0.00933039	-0.00872838	-0.00177961	-0.028135	-0.0668777	-0.00178348
223	GSM640717	14	male	66	124	20.01	EUR	EUR	-0.0326624	-0.0219342	0.0278106	-0.0137312	0.0343305	0.0143145	-0.00585106	-0.0394931	-0.00233263	0.0852642	-0.0107913	0.0254994	0.0107714	0.0149694	-0.00476786	-0.00866824	0.00113491	-0.0297063	-0.0604067	0.00365054
238	GSM640718	4	female	NA	38	NA	AFR	AFR	0.25053	-0.0444724	-0.00179059	0.153998	-0.144459	0.0845728	0.0701146	-0.219135	-0.00222531	0.360827	0.030056	-0.00128541	0.00182215	0.00318385	0.00139894	-0.00309547	0.000853387	-0.0242858	-0.0440341	0.00317801
253	GSM640721	45	female	63	169	29.93	AFR	AFR	0.227784	0.0222474	-0.228519	0.0330797	-0.0627924	-0.151789	-0.163155	0.0429899	0.0341592	0.0385434	0.0266641	0.00113013	0.00191421	0.00404069	-0.00446193	-0.00365317	0.00122507	-0.0266316	-0.043343	0.00199163
323	GSM640726	43	male	65	247	41.1	EUR	EUR	-0.0153346	-0.243907	-0.0526496	-0.0253884	-0.0472738	0.0513376	-0.0375312	0.089287	-0.00450432	0.054952	-0.00861584	0.0229237	0.00155108	0.0147673	0.0313353	0.0379286	-7.29791e-05	-0.00815518	-0.0285671	-0.0101539
325	GSM640727	60	male	68	150	22.8	EUR	EUR	-0.0294521	-0.0356822	-0.0179181	-0.00950091	-0.015486	-0.0066279	-0.0282104	-0.00285208	-0.0257157	-0.0073242	-0.0106782	0.0241231	0.00979416	0.0150882	-0.00878289	-0.0110783	0.000755193	-0.0243224	-0.039168	-0.00250399
331	GSM640729	62	female	61	140	26.45	EUR	EUR	-0.0324451	0.00147487	-0.0312628	-0.01268	-0.0120155	0.000680898	-0.0543742	0.00694978	0.0380575	-0.0407374	-0.0105656	0.0251368	0.0095042	0.0143975	-0.00436156	-0.0117918	-0.00114107	-0.0212984	-0.0641813	0.00478033
332	GSM640730	65	female	65	180	29.95	EUR	EUR	-0.0319782	0.0671108	0.0214964	-0.0264122	-0.0108059	0.0384998	0.00677188	0.0266716	0.00222377	0.0711628	-0.0109596	0.0248313	0.0104985	0.0148911	-0.007002	-0.0117435	-0.00191347	-0.0292958	-0.0584438	0.00662603
333	GSM640731	59	male	74	176	22.59	EUR	EUR	-0.0358081	0.0759704	0.0240735	0.0324424	0.00520789	0.00991466	0.0593252	0.0555574	-0.0768845	0.203303	-0.0110191	0.0257708	0.010172	0.0149357	-0.00530651	-0.0140538	0.00379401	-0.025527	-0.0658255	-0.00853538
334	GSM640732	63	male	70	242	34.72	EUR	EUR	-0.0333801	-0.0389036	-0.0020683	-0.000382426	0.0294215	-0.0159646	0.0951121	0.020388	0.041325	0.00326544	-0.0107691	0.025437	0.00997966	0.0154518	-0.0036397	-0.00655854	0.00102346	-0.0177489	-0.0629597	0.0117533
335	GSM640733	36	male	72	209	28.34	EUR	EUR	-0.0332203	0.0560422	-0.00448645	0.0421445	-0.0128118	0.0594987	-0.00599285	-0.0281672	-0.0616529	-0.0326531	-0.0109147	0.02506	0.0100515	0.0147801	-0.00423653	-0.00507591	0.00152566	-0.0236506	-0.0511429	-0.00164159
336	GSM640734	70	male	74	295	37.87	EUR	EUR	-0.0340511	0.0464503	-0.0305281	-0.0334627	-0.0563503	0.0196767	-0.0289883	0.0121137	0.0434835	0.0533633	-0.0111328	0.0244716	0.0109993	0.0147809	-0.00446239	-0.00896699	-0.00108492	-0.0308654	-0.0593912	0.0134654
337	GSM640735	34	male	74	240	30.81	EUR	EUR	-0.030808	0.0124653	0.00891938	-0.013161	-0.00856196	0.0198845	0.0323531	-0.0301525	0.00446752	0.0123199	-0.0108377	0.0243209	0.0093357	0.0167647	-0.00550498	-0.0072789	-0.000106948	-0.019822	-0.0587023	0.00402722
340	GSM640737	52	male	72	238	32.28	EUR	EUR	-0.0313099	-0.022905	0.0323651	0.0158995	0.00921209	-0.00121221	0.021458	0.0145159	0.0102552	0.059252	-0.0108818	0.0242513	0.00901219	0.0164405	-0.00169441	-0.00740391	-0.0039397	-0.0235738	-0.0551543	0.00722429
342	GSM640739	43	male	71	220	30.68	EUR	EUR	-0.0351485	0.0372764	-0.0147194	0.00560937	-0.048062	-0.00260507	0.0173118	-0.0613104	-0.0489005	-0.0571149	-0.0111085	0.0252539	0.011483	0.0137784	-0.00721295	-0.0140229	0.000435005	-0.0256533	-0.0589032	0.0022501
343	GSM640740	35	male	69	141	20.82	EUR	EUR	-0.0322247	-0.00424281	-0.000314776	-0.00771388	0.0082088	0.0513331	-0.019028	0.00190956	-0.0911955	-0.0261174	-0.0108281	0.0248588	0.0102119	0.0140473	-0.00121609	-0.00618072	0.00471278	-0.0201702	-0.0558708	0.0153803
344	GSM640741	63	male	69	218	32.19	EUR	EUR	-0.0323165	0.014588	0.00299275	-0.0107631	0.00123653	-0.00476561	0.0095354	0.0379354	0.0469401	-0.0328083	-0.0104716	0.0248931	0.0100963	0.0162971	-0.00367794	-0.00727463	0.00304808	-0.0163225	-0.0600917	0.0024749
345	GSM640742	60	male	69	233	34.4	EUR	EUR	-0.0348031	0.0468898	-0.00336716	0.0374152	-0.0276347	-0.0705966	-0.0700291	-0.000352184	0.0591607	0.0311893	-0.0111288	0.0246441	0.0111829	0.0157734	-0.00630189	-0.00680972	-0.0026161	-0.0240415	-0.0625395	0.009915
346	GSM640743	24	male	68	196	29.8	EUR	EUR	-0.033885	0.032116	0.0651346	-0.071097	0.0018772	0.0369266	-0.0110656	-0.0132287	-0.0397734	-0.0285383	-0.0106904	0.0258579	0.010242	0.0150188	-0.00500018	-0.0149902	-0.00103228	-0.0172635	-0.0538317	0.00918077
347	GSM640744	4	female	44	42	15.25	EUR	EUR	-0.0324458	0.0201165	0.0346849	0.0485948	0.0104032	-0.0296664	-0.0553784	0.096871	-0.00637435	-0.0248971	-0.0107687	0.0246531	0.0110524	0.0150984	-0.00463294	-0.00783647	-0.00246807	-0.0217562	-0.0620119	0.00908134
348	GSM640745	43	male	68	148	22.5	EUR	EUR	-0.0351212	0.027351	0.0463621	-0.0208863	0.0410789	-0.0468741	-0.0036066	0.0230539	-0.0229952	-0.0399932	-0.0111563	0.0254444	0.00860699	0.016469	-0.00251732	-0.00925173	-0.00153032	-0.0205783	-0.0612894	0.00266016
350	GSM640773	75	female	64	172	29.52	EUR	EUR	-0.0328203	-0.00921182	0.00486553	-0.0048708	-0.0252223	-0.0156684	-0.0501847	0.0188216	0.0384592	-0.058198	-0.0105823	0.0253223	0.0098994	0.015326	-0.00115421	-0.00778681	-0.00158184	-0.0220817	-0.0608835	0.0014336
351	GSM640774	49	male	76	257	31.28	EUR	EUR	-0.0338941	-0.035022	0.0485272	-0.00306544	-0.00179683	0.00125368	0.0309882	0.0153232	-0.00301723	0.00417847	-0.0110133	0.0250322	0.00933947	0.0151064	-0.00897426	-0.0112506	-0.00149911	-0.0209675	-0.0497829	0.000758281
352	GSM640775	72	male	67	176	27.56	EUR	EUR	-0.0311338	0.0227155	-0.00282569	0.0267034	0.000135397	-0.00162779	0.00189646	0.0282377	-0.0544733	-0.0757164	-0.0105849	0.0246734	0.0109228	0.0163624	-0.00693151	-0.0100795	-0.00210287	-0.0264321	-0.0621613	-0.00607425
356	GSM640779	37	male	72	165	22.38	EUR	EUR	-0.0299338	-0.0332133	0.0250177	-0.0544002	-0.0131313	0.064596	-0.0499762	-0.052071	0.0134155	4.95088e-05	-0.0104041	0.0245887	0.00730484	0.0159236	0.00182826	-0.000673553	0.00270135	-0.0202501	-0.0556033	0.0109379
357	GSM640780	62	male	68	240	36.49	EUR	EUR	-0.0345091	0.0502773	0.00126236	0.0149171	-0.00695426	0.0204832	-0.0256098	0.060754	0.0228209	-0.00344145	-0.0110437	0.0251782	0.0106755	0.0142832	-0.00614554	-0.0131551	-0.00215524	-0.0281466	-0.0637208	0.0125295
358	GSM640781	53	male	68	203	30.86	EUR	EUR	-0.0347279	-0.01598	0.0246883	0.0193615	-0.00211395	-0.0228753	-0.0479941	0.0831065	-0.0731042	-0.0987673	-0.0109334	0.0254651	0.00992594	0.0157773	-0.00177701	-0.00194698	5.97999e-05	-0.0227851	-0.0555208	0.00251265
360	GSM640783	54	male	72	209	28.34	EUR	EUR	-0.0279983	-0.0903899	0.0328229	0.0652608	0.033867	0.0342262	0.0251882	0.0361711	-0.0229126	-0.0543112	-0.00993374	0.0247366	0.00828073	0.0151408	0.00589592	0.0028985	0.00171024	-0.0261394	-0.0569938	-0.00140643
363	GSM640785	46	male	NA	NA	NA	EUR	EUR	-0.0329112	0.00101485	-0.0505092	-0.0157039	0.0190602	0.011119	0.0159549	0.0518759	0.0323429	0.0430864	-0.0107823	0.0254093	0.00997492	0.0164001	-0.00225623	0.000387704	0.00215638	-0.0217636	-0.054617	-0.00237244
365	GSM640786	28	male	69	158	23.33	EUR	EUR	-0.0325243	0.0344765	-0.00796441	0.0104491	0.00252159	-0.0862179	-0.0328049	-0.00642069	-0.0303863	0.0238538	-0.0106613	0.0257184	0.00925982	0.0149549	-0.00648664	-0.00533135	0.000881949	-0.0231933	-0.0648434	0.00666754
366	GSM640787	60	female	66	198	31.95	EUR	EUR	-0.0331345	0.0730738	-0.00794144	0.0216763	0.025921	-0.0257897	-0.0776059	0.0353862	0.0412939	0.033648	-0.0107573	0.0253352	0.010653	0.0154628	-0.00586593	-0.0075539	-0.00140528	-0.023649	-0.0633195	0.00663146
368	GSM640788	23	female	65	133	22.13	EUR	EUR	-0.0334032	0.0201385	-0.0147174	-0.00378935	0.0207148	-0.047008	0.00817493	0.000471158	-0.0365368	-0.0600744	-0.0110178	0.0244341	0.00979603	0.0165862	-0.00793054	-0.0144898	-0.00170635	-0.0273369	-0.0629858	0.0124489
369	GSM640789	66	female	63	155	27.45	EUR	EUR	-0.0327617	-0.0306692	-0.0167684	0.0717018	-0.0213344	-0.0440312	0.0601803	0.0337291	-0.00766216	0.00361705	-0.010571	0.0260258	0.00991216	0.0163646	-0.00251407	-0.0101864	0.00209708	-0.0234442	-0.0670412	0.00355806
372	GSM640790	37	male	67	182	28.5	EUR	EUR	-0.0343166	0.0335986	0.00780249	0.0127678	0.00776636	-0.075735	0.0173239	0.0469823	-0.0695946	-0.0779562	-0.0110623	0.0254931	0.010225	0.0156351	-0.00614295	-0.00511007	0.00250889	-0.0244575	-0.0651041	0.00843443
374	GSM640791	72	male	68	177	26.91	EUR	EUR	-0.03419	0.0302426	-0.0494007	-0.0050222	0.028992	-0.00673846	0.0385271	-0.0551379	0.00295127	0.0522539	-0.0109828	0.0249887	0.011087	0.0145998	-0.0112763	-0.0148654	0.00568431	-0.0229327	-0.063261	0.0038666
378	GSM640793	81	male	74	189	24.26	EUR	EUR	-0.0301138	-0.0335197	-0.0147346	-0.0309123	0.0283099	-0.0142187	-0.0181376	-0.00517186	0.0161389	-0.0364799	-0.0104334	0.0245599	0.00990369	0.0165241	-0.00422428	-0.00793844	0.00505707	-0.0223163	-0.0595456	0.00230315
382	GSM640797	56	male	70	180	25.82	EUR	EUR	-0.0342827	0.0276851	-0.0436514	-0.0117904	-0.0419649	-0.0162125	0.0152137	0.0259678	0.00125893	0.0233197	-0.0109888	0.0253438	0.00920991	0.0156708	-0.00797315	-0.0124651	0.00107969	-0.0182435	-0.0722965	0.00166145
383	GSM640798	61	male	NA	NA	NA	EUR	EUR	-0.0336213	0.0277678	0.0145617	-0.00594048	-0.0342998	0.018893	0.0416048	-0.0429294	0.0267138	-0.0496579	-0.0107684	0.0256191	0.0104683	0.015063	-0.00580929	-0.00857992	-0.00296946	-0.0298943	-0.0707689	-0.00222525
387	GSM640800	66	male	68	183	27.82	EUR	EUR	-0.034328	0.012915	-0.0222726	-0.0045796	-0.104651	0.0941152	0.028766	-0.00787625	-0.0026244	-0.128863	-0.0110865	0.0252408	0.0102307	0.015638	-0.00427606	-0.00929058	0.00491638	-0.0245287	-0.052081	0.000722839
390	GSM640803	59	female	NA	NA	NA	EUR	EUR	-0.0349613	-0.0213019	0.00679531	0.0419767	-0.00787707	-0.0115609	0.0650593	0.0119881	0.0267531	-0.0494393	-0.0112335	0.0253806	0.0101327	0.0157233	0.000276151	-0.000843965	-0.00143415	-0.0209534	-0.0554365	-0.00155606
399	GSM640805	22	female	NA	NA	NA	EUR	EUR	-0.029727	-0.0237828	0.0361949	0.0168452	-0.0320613	0.00195244	-0.00925731	-0.0165256	0.0187353	0.0485379	-0.0103838	0.0254737	0.00952234	0.0144358	-0.00059844	-0.00706369	0.00163219	-0.0236629	-0.0616162	0.0025283
401	GSM640807	38	female	69	350	51.68	EUR	EUR	-0.0323607	0.0010247	0.00387166	-0.028708	0.0473882	-0.00276792	0.014612	-0.062142	-0.0297843	0.0147318	-0.0107901	0.0250273	0.0104715	0.0149762	-0.00868755	-0.00982101	0.0011092	-0.0277838	-0.0645582	0.0121535
403	GSM640808	73	male	71	148	20.64	AMR	AMR	0.0503129	0.0600282	-0.111715	0.0374449	-0.022551	0.0662641	-0.0715818	-0.0715128	-0.101204	-0.138676	0.00117422	0.0178345	0.00834562	0.0117808	-0.0060774	-0.0115832	0.00156481	-0.027838	-0.0631462	0.000352724
414	GSM640816	29	male	70	94	13.49	EUR	EUR	-0.0328068	0.0032335	-0.00413402	0.0497443	0.0210444	0.0415475	0.000336395	-0.0223046	0.0237414	-0.0691023	-0.0111339	0.0239503	0.0102812	0.0140639	-0.0116372	-0.0145537	-0.0027317	-0.0158678	-0.0542645	-0.00567953
418	GSM640820	16	female	64	132	22.66	EUR	EUR	-0.0328938	0.0203543	-0.0200236	-0.0330534	0.0269822	-0.0133202	-0.0526771	-0.0174149	-0.0309697	0.00060389	-0.0108061	0.0245397	0.00974131	0.0158604	-0.004947	-0.00921845	0.000297193	-0.0179048	-0.0653841	0.0047158
431	GSM640826	56	male	NA	NA	NA	EUR	EUR	-0.0320745	-0.0242451	0.0412721	-0.0337462	-0.0340936	-0.0256618	0.0300486	-0.0262071	0.0042343	0.0724874	-0.0106702	0.0254065	0.00925148	0.0163852	-0.00787013	-0.00097917	-0.00440446	-0.0270967	-0.0607541	0.00526051
433	GSM640827	46	male	71	187	26.08	EUR	EUR	-0.0345139	0.0533351	0.0291793	-0.000892341	-0.0212326	0.0304268	0.012398	-0.0802822	0.00039245	-0.0137983	-0.0109776	0.0254191	0.00994101	0.0152263	-0.00607147	-0.0171531	-0.00245542	-0.0268401	-0.0703457	-0.000973996
434	GSM640828	64	male	66	104	16.78	EUR	EUR	-0.0361099	0.0864109	0.0265147	0.09502	0.0339711	-0.0221102	0.0780738	0.012415	-0.00262759	-0.0346354	-0.0111703	0.0254066	0.0101181	0.0163911	-0.0149307	-0.0229491	0.000756953	-0.0198034	-0.064487	0.00824224
435	GSM641227	58	female	66	213	34.38	AFR	AFR	0.194505	-0.0260611	0.594108	0.207219	0.319886	-0.215612	-0.018885	0.242762	0.112447	0.093989	0.0217666	0.00390716	0.00380832	0.00510409	-0.00191566	-0.00228899	0.00767578	-0.0285177	-0.0462695	-0.000445913
436	GSM641228	49	female	63	220	38.97	EUR	EUR	-0.0323477	0.0549648	0.00359575	-0.00490263	-0.00196752	0.0196226	0.00397952	-0.0498483	-0.0555994	0.086087	-0.0109072	0.0249585	0.00941516	0.0136381	-0.00641826	-0.00682215	0.000280906	-0.0229743	-0.0533508	0.00430339
437	GSM641229	62	female	63	148	26.21	EUR	EUR	-0.0346662	0.0413926	-0.0293166	0.0341907	0.0353151	-0.0192697	0.0579214	-0.0326369	-0.035227	0.0586409	-0.0111249	0.0254568	0.00970068	0.0146813	-0.00490299	-0.0119868	-0.000893527	-0.0212523	-0.0636945	0.00360622
438	GSM641230	7	female	46	48	15.95	EUR	EUR	-0.0313016	0.0335785	-0.00743339	-0.0713309	0.0425524	0.0538025	0.0174475	-0.0260267	-0.0359947	-0.0755187	-0.0106461	0.0248766	0.00876874	0.0152737	-0.00606487	-0.00413097	0.000161114	-0.0214811	-0.0462276	0.00552386
439	GSM641231	48	male	76	297	36.15	EUR	EUR	-0.0309186	0.0206198	0.000421808	-0.0163796	-0.024505	0.0587359	0.0289114	-0.0784123	0.0021163	-0.0397319	-0.0104786	0.0250664	0.0105302	0.0168085	0.00244138	-0.00109673	-0.000813817	-0.0149176	-0.0484108	-0.00188755
440	GSM641232	29	male	69	286	42.23	AFR	AFR	0.249318	-0.0251067	-0.125959	-0.0965721	0.0472452	0.211755	0.15575	0.167297	-0.281579	0.0828028	0.0296803	-0.00156071	0.000129015	0.00176211	-0.0047164	-0.00675258	0.00574781	-0.0263501	-0.0438164	-0.000719189
444	GSM641234	12	male	71	130	18.13	EUR	EUR	-0.0363404	0.0414668	-0.0367289	-0.00627499	-0.00150383	-0.0302595	-0.0546626	-0.0459022	0.0267705	-0.0832816	-0.011487	0.0247	0.0104548	0.0141612	-0.0112538	-0.0160914	0.000575759	-0.0211634	-0.0599528	-0.00226983
450	GSM641238	40	male	69	240	35.44	EUR	EUR	-0.0365104	0.0760647	-0.0678161	0.00358665	-0.0631561	-0.023861	-0.0232914	0.0768052	0.0308519	-0.107301	-0.0116022	0.0247495	0.010149	0.0159548	-0.00923696	-0.0155689	-0.000472532	-0.0228385	-0.0695262	0.00368641
457	GSM641239	13	male	66	213	34.38	AFR	AFR	0.23013	0.0444872	-0.209385	-0.287683	0.152137	0.0145254	0.141491	0.0672324	0.385247	0.109185	0.0268708	0.000162936	0.00211235	0.00333524	-0.00358245	-0.00494916	0.00592174	-0.0247625	-0.0378758	0.0056671
458	GSM641240	27	female	NA	NA	NA	AFR	AFR	0.217597	-0.0401225	0.250269	-0.0195204	-0.502794	-0.0724818	0.55311	-0.178198	0.0659815	0.0488904	0.0251209	0.0017141	0.0024186	0.0026408	-0.00473276	-0.00752604	0.0119228	-0.029186	-0.0459204	0.0070206
459	GSM641241	17	female	64	132	22.66	EUR	EUR	-0.0321103	-0.0246731	0.0745212	0.0145594	0.027155	-0.00912254	0.0394408	0.00484611	-0.0679049	-0.000408041	-0.010592	0.0255206	0.0108444	0.0144529	-0.00434004	-0.0112603	-0.00035879	-0.0231527	-0.0609265	-4.05574e-06
465	GSM641244	61	female	70	231	33.14	EUR	EUR	-0.0341215	0.0620399	0.0979609	-0.00761521	-0.0778681	-0.0436658	-0.00375194	-0.00151443	-0.0381574	-0.0661797	-0.0108122	0.0255798	0.0111804	0.0157729	-0.00725899	-0.0103725	-0.000236016	-0.0286014	-0.0694877	-0.0025383
470	GSM641247	68	female	71	209	29.15	EUR	EUR	-0.0361984	0.0112811	-0.0849761	0.0112512	0.00569182	0.0791747	-0.00410728	0.0488611	-0.0853503	-0.0252519	-0.0112531	0.0257898	0.00928622	0.0154837	-0.00810746	-0.00928592	-0.000808098	-0.0246005	-0.0585336	0.00717759
475	GSM641249	70	female	64	180	30.89	EUR	EUR	-0.0344498	0.0346681	-0.0177145	0.00503595	0.0461047	0.0247448	0.00543873	-0.0359058	0.107079	-0.0587403	-0.011154	0.0251297	0.00919351	0.0158962	-0.00815865	-0.0107087	0.0010508	-0.0230267	-0.0636207	-0.00614667
476	GSM641250	66	female	65	182	30.28	EUR	EUR	-0.0329244	0.0323126	-0.00867354	-0.00420965	-0.00142115	-0.00234042	0.026998	0.0205472	0.0750172	0.0282538	-0.0108761	0.025228	0.00842437	0.0135464	-0.0116751	-0.010211	-0.000192191	-0.018389	-0.0599953	0.00291113
477	GSM641251	38	female	65	154	25.62	EUR	EUR	-0.034579	-0.00446039	-0.028831	0.0314249	0.0556877	-0.0144753	-0.0252515	0.0136083	-0.036601	0.0245746	-0.0110187	0.0256205	0.0109706	0.014612	-0.000491865	-0.0126858	0.000527182	-0.0128796	-0.0643877	-0.00238798
478	GSM641252	56	female	63	247	43.75	EUR	EUR	-0.0333177	0.0227889	-0.0366381	0.0143	0.0300868	-0.0236099	-0.0296729	0.0840899	-0.00848435	-0.0211218	-0.0111379	0.0244334	0.00949789	0.0155727	-0.00621763	-0.00723566	0.00366355	-0.0264242	-0.0667814	0.00419337
479	GSM641253	57	female	65	132	21.96	AFR	AFR	0.214087	-0.0124916	-0.154787	0.0446008	0.351627	0.0528631	0.215183	-0.00512915	0.00690321	-0.245754	0.0246871	0.00182171	0.00318577	0.0062877	-0.00724768	-0.00370425	0.00497506	-0.0332698	-0.0454484	-0.00110085
484	GSM641256	34	female	61	174	32.87	EUR	EUR	-0.0346837	0.0638916	0.0296479	0.0165677	-0.0335661	-0.00424865	-0.0333383	-0.0063664	-0.0186515	-0.0305431	-0.01112	0.0247194	0.0109945	0.0145598	-0.0125651	-0.0193107	0.000586092	-0.0204266	-0.0584108	0.00465761
485	GSM641257	50	female	65	165	27.45	EUR	EUR	-0.0335402	0.0122441	-0.0453454	-0.0354695	0.0402204	0.0196343	0.0828881	-0.0236615	-0.0659638	0.0217829	-0.0107904	0.0253563	0.00962241	0.0159601	-0.00653682	-0.0122625	-0.00108202	-0.0213902	-0.0573498	0.0044475
489	GSM641258	28	male	72	180	24.41	EUR	EUR	-0.0298048	0.0569327	-0.0239862	-0.00282209	-0.00178885	-0.0396383	-0.0325984	-0.019536	-0.00947076	0.0280544	-0.0108722	0.0236041	0.0123107	0.0110613	-0.00296486	-0.0116391	0.00237227	-0.0275243	-0.0602386	0.00570944
492	GSM641260	63	female	71	167	23.29	AFR	AFR	0.209373	0.0250378	-0.0434631	-0.276553	-0.354756	-0.561429	-0.268556	0.0967913	-0.0375704	-0.123176	0.0238149	0.00275949	0.00312016	0.00375618	-0.00389044	-0.00451754	0.00338865	-0.0274278	-0.0515917	0.00383465
493	GSM641261	63	male	70	180	25.82	EUR	EUR	-0.0325802	0.0190684	-0.0354267	-0.0850272	0.0344189	-0.00318154	-0.0114938	-0.045189	0.0578318	0.072751	-0.010676	0.0251588	0.0109643	0.0143169	-0.00142636	-0.00322197	0.00082692	-0.0223067	-0.0536553	0.00710853
617	GSM641263	16	male	71	165	23.01	EUR	EUR	-0.0328924	0.00189229	0.0426892	-0.0196539	0.0327309	-0.0325302	0.0261178	0.0241893	-0.0955633	0.0178609	-0.0107514	0.0251423	0.00883879	0.014436	-1.15838e-05	-0.00278387	-0.00023348	-0.0286879	-0.0530959	0.0034755
618	GSM641264	56	male	70	175	25.11	EUR	EUR	-0.0332202	0.0149986	-0.0360479	-0.00257043	-0.0072221	-0.0290186	0.0754561	0.0753193	-0.0186337	-0.0391188	-0.0109061	0.02547	0.00852312	0.0150107	-0.00513963	-0.00667383	2.3967e-05	-0.022416	-0.0621567	-5.42409e-06
619	GSM641265	55	male	72	230	31.19	EUR	EUR	-0.033823	0.0342112	0.00133946	0.0200162	0.0282306	0.0198474	0.04552	-0.0150857	-0.0214797	0.0598322	-0.011111	0.0248888	0.00915419	0.0138421	-0.0102741	-0.0124014	-0.00242944	-0.0288463	-0.0642244	0.00873882
620	GSM641266	43	male	69	105	15.5	AFR	AFR	0.17897	-0.00552274	-0.0716248	0.52875	-0.326945	0.338037	-0.293304	0.15272	0.184206	0.047356	0.019701	0.00552363	0.00422179	0.00681487	-0.000333637	-0.00664712	0.00472933	-0.0255964	-0.0490087	-0.00342437
623	GSM641267	13	male	62	176	32.19	EUR	EUR	-0.0322251	0.0440896	0.0308246	0.0489016	0.0290171	0.0078577	-0.0134422	0.0109871	0.0716318	-0.0543027	-0.0107356	0.0255061	0.0102713	0.0150396	-0.00836716	-0.00569177	-0.000548156	-0.0184924	-0.0647016	0.0124669
627	GSM641269	74	female	64	132	22.66	EUR	EUR	-0.0337129	0.0318939	-0.0436527	0.0495226	-0.0245451	0.0606121	-0.100983	-0.0607606	0.0587433	-0.0366333	-0.0109198	0.0256612	0.00894176	0.0143556	-0.00788952	-0.0140394	-5.29989e-05	-0.0257672	-0.0587544	-0.00104261
629	GSM641270	50	female	NA	NA	NA	EUR	EUR	-0.0331922	0.0155426	0.0228451	-0.0364236	-0.0208302	-0.0174084	0.030361	0.0573371	-0.0156662	-0.0414512	-0.0108564	0.0245889	0.0105971	0.015467	-0.00958804	-0.0103207	0.00282578	-0.0209867	-0.0662529	-0.00424295
630	GSM641271	45	male	73	264	34.83	EUR	EUR	-0.0329154	0.027459	0.0114048	-0.0203825	-0.0106448	0.0198475	0.00325352	0.0106351	-0.00900878	-0.0229769	-0.0106338	0.02537	0.0107727	0.0151112	-0.00737345	-0.00936512	-0.00140017	-0.021418	-0.0609784	0.00252853
631	GSM641272	65	male	68	183	27.82	EUR	EUR	-0.0333733	0.00275113	0.0101366	-0.0395566	-0.0426211	-0.000288304	-0.0591924	-0.00525098	0.0252004	-0.103896	-0.0109403	0.0243928	0.00920459	0.0137339	-0.015278	-0.0155914	0.000697017	-0.0254073	-0.0496207	0.00625756
632	GSM641273	54	male	70	187	26.83	EUR	EUR	-0.0335964	0.00286487	-0.0191315	-0.0482398	0.0326095	-0.0311867	0.0157003	-0.110286	0.0258523	0.0428822	-0.0108031	0.0248988	0.00914268	0.0134285	-0.0025585	-0.00882959	0.000724057	-0.0262133	-0.0566324	-0.00116641
633	GSM641274	15	male	69	161	23.77	EUR	EUR	-0.0347927	-0.0123121	-0.0685916	-0.0628155	0.0250474	0.0662095	0.0586613	0.0224382	-0.0446568	0.0834913	-0.0106785	0.0260811	0.0108248	0.015351	-0.00966181	-0.00669831	0.00324225	-0.0206958	-0.0592117	0.00710947
634	GSM641275	60	male	68	170	25.85	EUR	EUR	-0.0332964	-0.00316628	-0.0147341	-0.0025129	-0.0136787	-0.00487351	-0.0187122	-0.00496282	0.0836217	0.0543542	-0.0109373	0.0246613	0.0101953	0.0169005	-0.00694301	-0.011792	-0.00528432	-0.0264074	-0.0595476	0.00327213
636	GSM641276	47	male	68	220	33.45	EUR	EUR	-0.0135271	-0.656829	-0.0803288	-0.0780935	-0.0131209	-0.0587326	-0.0246201	-0.0849446	0.107533	0.0333869	-0.00860773	0.023052	0.00436288	0.0127944	0.0222357	0.0291259	-0.00301107	-0.0064602	-0.0263671	-0.00742554
639	GSM641278	60	male	68	172	26.15	EUR	EUR	-0.0305685	-0.00402614	-0.0154627	0.0514652	-0.0194368	-0.0341122	-0.017563	0.11556	0.0142295	-0.0184051	-0.0104306	0.0250124	0.0085076	0.0139536	-0.000671226	-0.00378305	0.00154473	-0.0190475	-0.0684347	0.00863713
644	GSM641282	60	female	NA	NA	NA	EUR	EUR	-0.0344647	0.0548151	-0.0426206	-0.0165931	-3.41485e-06	0.013079	-0.00506337	0.00044837	-0.0441484	-0.00650751	-0.0110533	0.0257132	0.0105141	0.01633	-0.00904172	-0.0103675	-0.00275255	-0.030157	-0.0570947	0.00452703
649	GSM641287	22	male	67	140	21.92	EUR	EUR	-0.026938	-0.0294214	-0.00953645	-0.0159344	0.0379285	-0.00793306	0.120637	0.0485707	-0.0846003	0.0972685	-0.00993022	0.0243998	0.009927	0.014872	-0.00161862	-0.004074	-0.00179392	-0.0194365	-0.0602626	0.00134649
651	GSM641288	17	female	NA	NA	NA	EUR	EUR	-0.0323827	0.0269679	0.0481284	0.0243825	0.0463755	-0.0431139	-0.0218971	0.0185771	-0.0978876	0.081507	-0.0109003	0.0242756	0.0109065	0.0148557	-0.00395642	-0.00951783	-0.00397743	-0.0243857	-0.0626221	-0.00119081
657	GSM641289	15	female	NA	NA	NA	EUR	EUR	-0.0282431	0.00810258	0.00266735	0.00519874	-0.00562789	-0.0697921	0.0140208	0.0271385	0.0533586	0.0251625	-0.010486	0.0240078	0.0091857	0.0122333	-0.00577383	-0.00252452	-0.00430341	-0.0218645	-0.0580212	0.00386739
659	GSM641290	52	male	70	171	24.53	AFR	AFR	0.179318	0.0506086	0.019822	0.00328215	0.173956	-0.0689788	-0.252177	-0.618247	-0.294799	0.147379	0.019692	0.00483998	0.00444307	0.00638415	-0.00405374	-0.00359449	0.00116286	-0.0233377	-0.0502704	0.00390497
662	GSM641291	35	female	66	251	40.51	EUR	EUR	-0.035148	0.0012956	-0.0286307	-0.0205207	0.017422	0.00766285	-0.00725877	0.0242034	0.0258101	-0.0124011	-0.011219	0.0248456	0.0098828	0.0147177	-0.00992501	-0.0146761	0.00395872	-0.0196552	-0.0670674	-0.00247255
669	GSM641293	66	female	NA	NA	NA	EUR	EUR	-0.0318891	-0.0130318	-0.0383916	0.025314	-0.018453	-0.0503235	-0.00457386	-0.0974088	0.0413723	-0.0777132	-0.0106793	0.0247306	0.0110495	0.0151169	-0.00905028	-0.00831572	0.00156187	-0.0242548	-0.0588421	0.00581239
671	GSM641294	3	female	NA	NA	NA	EUR	EUR	-0.0308613	-0.0142793	0.00686154	-0.0638893	-0.0627353	0.023216	-0.0755801	-0.0797401	0.11098	0.0397211	-0.0107915	0.0238006	0.00838641	0.0139154	-0.0190527	-0.0238944	0.00203544	-0.0249386	-0.0526628	-0.00275901
687	GSM641295	52	male	NA	NA	NA	EUR	EUR	-0.020558	-0.246273	-0.0165658	0.0157102	-0.0103726	-0.0322996	-0.0784655	0.104777	0.0297637	-0.0297167	-0.00936047	0.0237806	0.00502105	0.0143373	0.0239722	0.0305906	-0.000954163	-0.010769	-0.0328908	-0.00701062
711	GSM641296	73	male	NA	NA	NA	EUR	EUR	-0.0359054	0.0655077	0.00985114	-0.0629444	0.0572743	-0.000885666	-0.0521492	-0.00715156	0.0340844	0.0695272	-0.0113084	0.0250831	0.0111304	0.0147114	-0.00912337	-0.0134481	0.000696705	-0.0241055	-0.0673124	0.00564068
713	GSM641297	20	male	71	191	26.64	EUR	EUR	-0.034252	0.0333464	-0.013785	0.00761832	-0.0430191	0.00222244	-0.0236946	0.0253429	0.0119668	-0.036292	-0.0108526	0.0252599	0.00981597	0.0146549	-0.0134873	-0.0204309	-0.000399537	-0.0196234	-0.0602782	-0.00299791
720	GSM641299	51	male	64	172	29.52	EUR	EUR	-0.0345534	0.0351311	0.0323304	0.00382437	0.0292296	-0.0236608	-0.00124186	0.0279657	-0.0888888	0.0301869	-0.0109998	0.0251819	0.0102725	0.0154103	-0.00525068	-0.010033	-0.000702683	-0.0229683	-0.0632033	0.00369376
724	GSM641302	61	male	72	202	27.39	EUR	EUR	-0.032839	-0.0226241	0.0315867	0.0583213	0.0266166	-0.0796659	-0.0113562	-0.00437209	0.0140864	0.0662583	-0.010745	0.0248822	0.0112672	0.0169233	-0.000779048	-0.0075292	-0.00502202	-0.0224798	-0.0689683	-0.00357632
730	GSM641306	57	male	73	253	33.38	EUR	EUR	-0.0337345	-0.0357405	0.00398099	-0.00976977	-0.0194416	0.0981296	-0.0775382	-0.0942865	0.114719	-0.0141469	-0.01134	0.0234587	0.00907663	0.0154195	-0.0210741	-0.0271214	0.000124658	-0.0140429	-0.0526899	-0.00618266
733	GSM641308	49	male	73	288	37.99	EUR	EUR	-0.0317068	0.00707544	-0.0231092	-0.0102516	-0.0329285	-0.00549622	0.0300227	-0.0270788	0.0797233	-0.0030126	-0.0103548	0.0255467	0.0111198	0.0153931	-0.00945296	-0.0116673	-0.0012085	-0.0196031	-0.0542115	0.00864465
741	GSM641309	68	male	69	150	22.15	AMR	EUR	-0.0162076	-0.355948	0.120053	-0.0227971	0.0745167	-0.0122387	0.00496446	0.0316975	-0.116955	-0.0215566	-0.00901697	0.0222481	0.00552693	0.0137707	0.0192268	0.0278951	0.00208146	-0.00299614	-0.034813	-0.00205159
744	GSM641311	22	male	72	162	21.97	EUR	EUR	-0.0340503	0.0391123	0.0168218	-0.00383651	0.0129276	0.043114	0.0108897	-0.0570694	0.0199959	-0.0525489	-0.0111179	0.0247711	0.00914686	0.0155952	-0.00882244	-0.0107224	0.00169147	-0.0267137	-0.0628578	0.00522543
750	GSM641315	50	male	72	176	23.87	EUR	EUR	-0.0143282	-0.387978	-0.0277558	0.00960199	0.0412772	0.0334311	-0.0692274	-0.035059	-0.127299	-0.0831514	-0.00849208	0.0223401	0.00458382	0.0142014	0.0253329	0.0283708	0.000757471	-0.00744381	-0.0366396	-0.000452523
751	GSM641316	19	male	72	200	27.12	EUR	EUR	-0.0345707	0.0407086	0.037656	0.101051	0.00312855	-0.0468434	0.0751741	0.00263296	-0.0747853	0.0322132	-0.0109278	0.0253166	0.010179	0.0154714	-0.006348	-0.0112598	-0.000667804	-0.0213977	-0.064719	0.00594856
753	GSM641317	16	female	NA	NA	NA	EUR	EUR	-0.0321852	-0.021227	-0.0252329	0.0296992	-0.0359178	-0.0432277	-0.00185629	-0.0828152	0.0933884	0.06738	-0.0106002	0.0255601	0.0101831	0.0146655	-0.00764057	-0.00851108	0.00384593	-0.0223325	-0.0649852	0.00371451
755	GSM641319	75	female	62	123	22.49	EUR	EUR	-0.0345133	0.0163251	0.0121786	0.0284057	0.0209499	0.0997329	0.00067542	-0.044628	-0.00502749	-0.0314335	-0.0106952	0.0259957	0.00896577	0.0156205	-0.00696825	-0.00851757	-0.00132417	-0.0196153	-0.0630694	0.00463585
765	GSM641323	69	male	66	174	28.08	EUR	EUR	-0.0345752	0.0159845	0.00979607	0.0077055	0.00623268	0.0087357	-0.0183135	-0.0194857	-0.0243205	0.0499538	-0.0108828	0.0255538	0.011085	0.0152163	-0.00912041	-0.00850749	-0.00195493	-0.0235466	-0.0579183	0.00362125
767	GSM641324	30	female	62	220	40.23	EUR	EUR	-0.0324029	0.0283831	-0.00483284	-0.0105912	-0.0201098	0.0145903	0.0107049	-0.0301225	0.161379	0.0159667	-0.0106032	0.0253349	0.00970652	0.0155131	-0.00806514	-0.0117124	0.00361717	-0.0253412	-0.0573936	0.00131674
770	GSM641325	79	male	71	190	26.5	AFR	AFR	0.238099	0.0666661	-0.0781268	-0.326952	0.0950141	0.167786	-0.169686	0.268512	-0.00427978	0.385787	0.0282316	-0.000341146	0.00233561	0.00344907	-0.00461186	-0.00278032	0.00117911	-0.0208984	-0.0407594	-0.00105362
773	GSM641326	47	female	NA	NA	NA	EUR	EUR	-0.0286725	-0.0245535	-0.01051	-0.0183743	-0.0474411	0.0547425	-0.0484943	-0.0358979	0.0832202	0.0259722	-0.0107618	0.0232317	0.00849477	0.0145561	-0.00547751	-0.00956438	-0.00164087	-0.0148063	-0.0533339	0.00954705
775	GSM641327	53	male	72	175	23.73	EUR	EUR	-0.0302457	0.035584	0.038877	-0.0157169	0.0201582	0.00435528	0.114955	0.0470294	0.0521099	0.0086572	-0.010628	0.0245698	0.0104216	0.0154222	-0.0050412	-0.00643191	-0.00197264	-0.0250803	-0.0560578	-0.000921821
778	GSM641328	56	male	NA	NA	NA	EUR	EUR	-0.0325144	0.00444502	-0.0125474	-0.0635488	-0.0359764	-0.0269425	-0.0130497	-0.0177699	-0.0146171	-0.0452424	-0.0109433	0.0250693	0.00806037	0.0136749	-0.00199073	-0.00384134	0.00020623	-0.0185504	-0.0568308	0.00885487
779	GSM641329	47	female	66	390	62.94	EUR	EUR	-0.0346366	0.0146968	-0.0233832	-0.0175582	0.00914558	0.0224251	-0.0299564	-0.0624691	-0.0638414	-0.000551144	-0.0110368	0.0252224	0.00999471	0.0169733	-0.00924691	-0.0164006	-0.000855691	-0.0260749	-0.0639428	0.00387258
780	GSM641330	70	male	80	300	32.95	EUR	EUR	-0.0340556	0.0403877	-0.00312015	0.0602794	-0.0181729	-0.0501339	0.0117085	0.0114215	-0.110534	0.0297041	-0.0109887	0.0251273	0.00972025	0.0154865	-0.0041017	-0.00599477	-0.00210622	-0.0268249	-0.0572448	0.00885258
783	GSM641331	25	male	68	151	22.96	EUR	EUR	-0.032391	-0.0157218	-0.00738819	0.0554371	-0.00322805	-0.0198734	0.0097322	0.0189806	-0.063187	0.0946993	-0.0105843	0.0255185	0.0107562	0.013808	-0.00114165	-0.00525967	0.00114047	-0.0277667	-0.0598816	0.0100884
786	GSM641332	16	male	64	134	23	EUR	EUR	-0.034373	0.00383692	-0.0103229	-0.0151436	0.00910718	0.0734877	-0.00878603	-0.00280128	0.0183628	0.0220004	-0.0109479	0.0255649	0.00931916	0.0150832	-0.00941004	-0.0051107	-0.00134697	-0.0281257	-0.0650725	0.00208772
791	GSM641334	55	female	66	165	26.63	AFR	AFR	0.253227	0.0203605	-0.0605567	0.073042	0.00351957	-0.112817	-0.0112616	0.12823	-0.149958	-0.165103	0.0302237	-0.00200285	0.00181992	0.0015834	-0.00352326	-0.00670787	0.0128067	-0.0338593	-0.0354922	0.00205408
793	GSM641335	36	female	73	306	40.37	EUR	EUR	-0.0364892	0.0278909	0.0279736	-0.0120485	0.0256985	-0.0536926	0.0349453	-3.97146e-05	0.0672414	0.0350219	-0.0114502	0.0243514	0.0108023	0.0148272	-0.0145335	-0.0201961	0.000317408	-0.023789	-0.0684284	-0.00578167
794	GSM641336	16	male	75	312	38.99	EUR	EUR	-0.0342494	0.0114992	0.0126474	-0.0188226	-0.0284527	0.0755402	0.0133842	0.044524	0.0456659	-0.0558747	-0.0111403	0.0248081	0.00972303	0.0147422	-0.00880419	-0.0151867	-0.0029588	-0.0266494	-0.0602134	-0.00335809
795	GSM641337	50	male	NA	NA	NA	EUR	EUR	-0.0323528	-0.0270424	0.00522853	-0.0193904	-0.0169557	-0.0137725	0.00138298	-0.00653526	0.00485793	0.0237436	-0.0108623	0.024491	0.00936253	0.0152121	-0.00717165	-0.0072783	0.00119186	-0.0194987	-0.0618914	-0.00631594
796	GSM641338	57	male	NA	NA	NA	AFR	AFR	0.245222	-0.0359439	-0.012463	0.177825	0.00356717	-0.0832081	0.0378207	0.137737	-0.249752	0.0801275	0.028877	-0.00124654	0.0017121	0.00244002	-0.00310457	-0.00592902	0.00399636	-0.0275695	-0.0423934	-0.00377014
798	GSM641340	64	male	NA	NA	NA	EUR	EUR	-0.032626	-0.0559279	-0.01596	0.0110398	-0.00581151	0.0667235	-0.0150437	-0.0170393	0.115597	-0.0549491	-0.0111744	0.0237697	0.0099758	0.013365	-0.00970311	-0.0155532	-0.000242498	-0.012101	-0.0528248	-0.000790104
800	GSM641341	56	female	NA	NA	NA	AFR	AFR	0.26095	0.0263025	-0.097298	0.228238	0.108806	-0.088471	-0.0514766	-0.0898594	0.0551598	-0.154045	0.0315373	-0.00262203	0.00246345	0.000408012	-0.000864684	-0.00669099	-0.000681397	-0.0124425	-0.0437527	0.00156157

## Sheet: S2 ATAC_metrics_singleLibraries
Supplemental Table 2. ATAC metrics for individual libraries that had percentReadsInPeaks >= 10 and TSS enrichment >= 4. Library IDs are in the format "donorID_l[library_number]_s[sequencing_run]", where library number represents a separate ATAC-seq library and sequencing_run represents whether the run was sequenced multiple times to increase depth. For columns with numbers of reads or alignments,…
library_ID	sequencing_instrument	number_raw	number_adapterTrim	number_aligned	number_nuclear	percent_nuclear	number_chrM	percent_chrM	number_deduplicated_alignments	percent_deduplicated	number_peaks	percentReadsInPeaks	TSS_enrichment
1_l1_s1	Illumina HiSeq 4000	73298452	71997272	59311247	51494193	86.8	7751580	13.1	40251272	78.2	134950	43.6	6.8
1_l2_s1	Illumina HiSeq 4000	81417194	80349577	67110287	58167949	86.7	8861126	13.2	41666831	71.6	146963	48.5	9.6
1_l3_s1	Illumina HiSeq 4000	43888597	42942187	35422587	31197201	88.1	4184281	11.8	23527397	75.4	113508	37.9	5.9
122_l1_s1	Illumina HiSeq 4000	77114586	76498714	59521168	24945367	41.9	34535434	58	18775547	75.3	57382	10.2	4.8
122_l1_s2	Illumina HiSeq X Ten	70431265	69981847	54306201	20928394	38.5	33342856	61.4	17727981	84.7	75854	13.1	6.7
122_l2_s1	Illumina HiSeq 4000	76407135	75728565	59446707	22755803	38.3	36651412	61.6	16331431	71.8	63934	11.6	5.4
122_l3_s1	Illumina HiSeq 4000	109220285	108289950	84474415	28915000	34.2	55507919	65.7	23437928	81.1	78261	11.1	5.4
151_l1_s1	Illumina HiSeq 4000	84025474	82656718	63818111	40584604	63.6	23176066	36.3	31698089	78.1	92973	24.8	5.4
151_l2_s1	Illumina HiSeq 4000	91477206	90433526	69455753	43561258	62.7	25832464	37.2	31947491	73.3	100603	27.8	6.4
151_l3_s1	Illumina HiSeq 4000	43689528	43215216	33026915	19632835	59.4	13364329	40.5	13705347	69.8	71273	23.4	6.6
152_l1_s1	Illumina HiSeq 4000	62874886	61959259	51721161	42662815	82.5	8988494	17.4	31359407	73.5	103191	25.8	6.6
152_l2_s1	Illumina HiSeq 4000	59593968	58713514	49850383	42794417	85.8	6990671	14	30656697	71.6	117540	35	7.4
152_l3_s1	Illumina HiSeq 4000	64560329	63480503	53516372	45819217	85.6	7629117	14.3	35384169	77.2	113928	34.7	6.3
156_l1_s1	Illumina HiSeq 4000	66683085	65860813	52342312	33390166	63.8	18909325	36.1	24076527	72.1	96509	32.2	5.9
156_l2_s1	Illumina HiSeq 4000	56644739	56009153	45786964	32579105	71.2	13166035	28.8	22639463	69.5	97885	32.5	5.9
156_l3_s1	Illumina HiSeq 4000	64746037	63303345	51636872	38048068	73.7	13540414	26.2	29474838	77.5	104742	31.6	4.9
162_l1_s1	Illumina HiSeq X Ten	58708303	58137777	46461348	22157239	47.7	24263301	52.2	18630454	84.1	103006	26.7	8.2
162_l1_s2	Illumina HiSeq X Ten	74050959	73500571	58061334	28228012	48.6	29783659	51.3	23252968	82.4	125096	31.5	10.8
162_l2_s1	Illumina HiSeq X Ten	87618230	86409602	68918844	31400976	45.6	37458304	54.4	25764918	82	114504	25	8.1
162_l3_s1	Illumina HiSeq X Ten	70015860	69256191	54616764	26233205	48	28334248	51.9	21598948	82.3	105537	25.5	7.9
172_l1_s1	Illumina HiSeq X Ten	66824673	65732819	52154422	25834983	49.5	26279687	50.4	21069360	81.6	102036	26.9	6.9
172_l1_s2	Illumina HiSeq X Ten	62664376	61907945	49059992	25111827	51.2	23910861	48.7	20306657	80.9	99817	29.4	8.7
172_l2_s1	Illumina HiSeq X Ten	58487128	57677084	45172399	22190036	49.1	22948752	50.8	17767847	80.1	98550	26.9	7.4
172_l3_s1	Illumina HiSeq X Ten	60671173	59826734	47236022	22685188	48	24516250	51.9	18746686	82.6	102277	27.3	6.9
174_l1_s1	Illumina HiSeq X Ten	69293239	68093862	56854939	40910795	72	15880879	27.9	33003534	80.7	148221	38.6	8.1
174_l2_s1	Illumina HiSeq X Ten	55054399	54119672	44772310	32294608	72.1	12427693	27.8	26072544	80.7	138450	36.1	7.8
174_l2_s2	Illumina HiSeq X Ten	64464894	63772740	53064293	38411859	72.4	14592733	27.5	30457373	79.3	155741	43.4	12
174_l3_s1	Illumina HiSeq X Ten	83626054	82186088	68881967	50509191	73.3	18294455	26.6	40022470	79.2	147018	34.9	7.4
174_l3_s2	Illumina HiSeq X Ten	72975801	72209460	60559700	44869248	74.1	15622292	25.8	35562015	79.3	154268	38.2	9.6
175_l1_s1	Illumina HiSeq X Ten	87148847	85892834	71145424	59052810	83	12002771	16.9	46541157	78.8	131368	45.4	9.3
175_l2_s1	Illumina HiSeq X Ten	79843899	78416196	65769487	55362456	84.2	10324898	15.7	44828698	81	125896	41.6	8.7
177_l1_s1	Illumina HiSeq X Ten	56432664	55573363	43115069	23656810	54.9	19420837	45	19195449	81.1	100546	36	9.1
177_l1_s2	Illumina HiSeq X Ten	53975236	53020827	41322013	23342741	56.5	17938954	43.4	18309740	78.4	105187	44.3	14.8
177_l2_s1	Illumina HiSeq X Ten	80470481	79287853	61724979	31422442	50.9	30250933	49	25272412	80.4	102890	32.3	8.3
177_l2_s2	Illumina HiSeq X Ten	69712553	68876464	53243368	27170834	51	26028593	48.9	21688147	79.8	103684	36.6	11.8
200_l1_s1	Illumina HiSeq X Ten	57105879	55737419	43767143	19575246	44.7	24159405	55.2	16223090	82.9	76601	23.9	5.4
200_l1_s2	Illumina HiSeq X Ten	49470330	48790711	38477998	18044867	46.9	20404715	53	14829062	82.2	76460	25.2	6
200_l2_s1	Illumina HiSeq X Ten	91475828	90164931	70637598	27620975	39.1	42968338	60.8	22773669	82.4	107917	29.7	7.3
200_l2_s2	Illumina HiSeq X Ten	40683653	39756481	31137663	11425989	36.7	19690764	63.2	9534252	83.4	79208	31.5	11.2
201_l1_s1	Illumina HiSeq X Ten	30642467	29800626	23040385	11174276	48.5	11848053	51.4	9161509	82	60673	21.8	5.5
201_l2_s1	Illumina HiSeq X Ten	81717176	80615375	63949574	27255898	42.6	36649665	57.3	21843741	80.1	105265	34.9	8.4
201_l3_s1	Illumina HiSeq X Ten	82471267	81165456	64272212	28067113	43.7	36156201	56.2	22802111	81.2	115129	32.7	9.1
201_l3_s2	Illumina HiSeq X Ten	70501245	69274302	54514851	22930250	42.1	31544367	57.9	18013337	78.6	116533	39.8	15.2
204_l1_s1	Illumina HiSeq X Ten	55648938	54925135	43281741	20889854	48.3	22363324	51.7	17184983	82.3	73195	22.5	7
204_l1_s2	Illumina HiSeq X Ten	75625247	75156582	58562349	28443469	48.6	30081951	51.4	21139874	74.3	83297	25.7	8.8
204_l2_s1	Illumina HiSeq X Ten	66297643	65557724	52363388	27052289	51.7	25273870	48.3	21369576	79	82238	23.3	6.8
204_l2_s2	Illumina HiSeq X Ten	71239189	70685259	55136478	29574910	53.6	25524177	46.3	22460383	75.9	86968	25.2	7.8
217_l1_s1	Illumina HiSeq X Ten	55065401	54258309	45903805	37934159	82.6	7908333	17.2	30330106	80	123875	30.8	7.1
217_l2_s1	Illumina HiSeq X Ten	66480630	65561521	57025600	54337994	95.3	2609216	4.6	45454291	83.7	148555	43.4	7.4
217_l3_s1	Illumina HiSeq X Ten	65091813	64003669	54948238	49419323	89.9	5455984	9.9	40350540	81.7	136903	37.4	6.9
221_l1_s1	Illumina HiSeq X Ten	55117930	54185287	44822669	32026342	71.4	12752169	28.4	26328419	82.2	115421	29.9	6.3
221_l2_s1	Illumina HiSeq X Ten	61386638	60704472	48032281	26073861	54.3	21918740	45.6	20754850	79.6	101291	25.1	7.2
221_l3_s1	Illumina HiSeq X Ten	70475425	68833660	59289826	55616929	93.8	3597659	6.1	47797284	85.9	140748	34.6	4.6
223_l1_s1	Illumina HiSeq X Ten	65174957	64326774	48537389	21009615	43.3	27496223	56.6	18058960	86	102766	28.3	9.3
223_l2_s1	Illumina HiSeq X Ten	51898436	51141759	38450165	17977965	46.8	20447036	53.2	15703244	87.3	72743	21	6.3
223_l3_s1	Illumina HiSeq X Ten	60657340	59836086	45842762	19758020	43.1	26054022	56.8	17255516	87.3	100710	29	10.1
238_l1_s1	Illumina HiSeq X Ten	71028473	70464016	59054919	44622403	75.6	14385124	24.4	33782214	75.7	120982	46.1	9.6
238_l2_s1	Illumina HiSeq X Ten	55412866	54637990	45495147	35316011	77.6	10142523	22.3	28238627	80	105609	39.1	6.4
238_l3_s1	Illumina HiSeq X Ten	64957880	64303712	52877041	38067013	72	14769254	27.9	28695903	75.4	122506	46	11
253_l1_s1	Illumina HiSeq X Ten	83256130	81462513	65479710	51398856	78.5	13980360	21.4	43209701	84.1	121744	34	6.8
253_l2_s1	Illumina HiSeq X Ten	71856088	71064800	55148235	30133315	54.6	24962916	45.3	25234350	83.7	105917	26.8	7.3
253_l3_s1	Illumina HiSeq X Ten	79620555	78740965	61056354	34275811	56.1	26721432	43.8	29202077	85.2	101501	23.9	6.4
323_l1_s1	Illumina HiSeq X Ten	63505008	62395817	52806148	47286210	89.6	5430632	10.3	39764577	84.1	115341	15.3	6.1
323_l2_s1	Illumina HiSeq X Ten	55697369	54906990	46129953	40179931	87.1	5873461	12.7	32323490	80.4	104961	13.6	6.2
323_l3_s1	Illumina HiSeq X Ten	65257418	64149144	55043188	53598244	97.4	1340133	2.4	44623733	83.3	127183	17.5	5.7
325_l1_s1	Illumina HiSeq X Ten	60726435	60217160	44309500	12272930	27.7	32013955	72.2	10093478	82.2	54868	10.9	5.7
325_l2_s1	Illumina HiSeq X Ten	53573630	53025019	38966469	10910457	28	28036732	72	9253045	84.8	54121	12.7	5.9
325_l3_s1	Illumina HiSeq X Ten	55222260	54673165	40789304	13286936	32.6	27480655	67.4	11350287	85.4	77352	17.9	6
331_l1_s1	Illumina HiSeq X Ten	73568357	72824500	55841033	20648978	37	35164028	63	17282409	83.7	80879	26	7
331_l2_s1	Illumina HiSeq X Ten	63128525	62613273	48767879	19176002	39.3	29566129	60.6	16302709	85	72187	23.1	5.9
331_l3_s1	Illumina HiSeq X Ten	77521073	76770097	58644640	21614141	36.9	37001886	63.1	18018976	83.4	82782	25.2	6.6
332_l1_s1	Illumina HiSeq X Ten	49778417	48721214	40335442	32399963	80.3	7892582	19.6	27975261	86.3	108288	29	5.9
332_l2_s1	Illumina HiSeq X Ten	60911710	59681980	49428853	37224981	75.3	12154708	24.6	31770842	85.3	119587	31.6	6.1
332_l3_s1	Illumina HiSeq X Ten	67165449	65241470	53375251	40945662	76.7	12375807	23.2	35169151	85.9	118356	31.7	5.8
333_l1_s1	Illumina HiSeq X Ten	83113103	81141087	63657355	28007557	44	35611682	55.9	23753587	84.8	102846	33.1	6.4
333_l2_s1	Illumina HiSeq X Ten	85163154	83330070	65448103	31665980	48.4	33740794	51.5	26888317	84.9	106992	34.9	6.5
333_l3_s1	Illumina HiSeq X Ten	70321522	68804688	54755838	27306307	49.9	27411768	50.1	23141229	84.8	101807	33.7	6.7
334_l1_s1	Illumina HiSeq X Ten	45257759	44072874	37535849	34531389	92	2957940	7.9	29126252	84.3	115683	34.5	5.6
334_l2_s1	Illumina HiSeq X Ten	53721607	52145281	44252062	40996434	92.6	3200313	7.2	34308035	83.7	119901	33.4	5.4
334_l3_s1	Illumina HiSeq X Ten	64473116	63014359	53723348	50268400	93.6	3387899	6.3	42370976	84.3	130485	35.7	5.9
335_l1_s1	Illumina HiSeq X Ten	62759218	61453270	49662512	33975773	68.4	15648177	31.5	28998578	85.3	114897	31.4	5.6
335_l2_s1	Illumina HiSeq X Ten	67547964	66142405	52771915	35040294	66.4	17692466	33.5	29988388	85.6	114428	30.1	5.3
335_l3_s1	Illumina HiSeq X Ten	61115378	59879964	47518028	28728183	60.5	18755996	39.5	24484186	85.2	106312	29.6	5.5
336_l1_s1	Illumina HiSeq X Ten	74187004	72843189	59034174	38735869	65.6	20241847	34.3	33083280	85.4	96439	17.8	5.6
336_l2_s1	Illumina HiSeq X Ten	64518420	63165267	51377529	34194551	66.6	17131827	33.3	28954675	84.7	89991	17.6	5.4
336_l3_s1	Illumina HiSeq X Ten	64274973	62919008	50950299	31603619	62	19299855	37.9	26731334	84.6	87101	17.7	5.2
337_l1_s1	Illumina HiSeq X Ten	45832506	44825466	33999917	15649771	46	18318881	53.9	13649604	87.2	62531	13.6	5.2
337_l2_s1	Illumina HiSeq X Ten	59857685	58611635	45004084	20139175	44.8	24823194	55.2	17473059	86.8	74464	14.3	5.3
337_l3_s1	Illumina HiSeq X Ten	37156202	36237100	27813018	13330515	47.9	14455634	52	11609359	87.1	58332	12.3	5.1
340_l1_s1	Illumina HiSeq X Ten	58111782	57270936	44379006	17076830	38.5	27269615	61.5	14518949	85	100259	24.2	11.1
340_l2_s1	Illumina HiSeq X Ten	63129775	62453104	49118326	18393021	37.5	30691108	62.5	15939707	86.7	88661	23.9	9.9
340_l3_s1	Illumina HiSeq X Ten	85441903	84608358	65946144	26301635	39.9	39598456	60	22427345	85.3	112299	26	8.8
342_l1_s1	Illumina HiSeq X Ten	74810965	73457174	56687629	14104908	24.9	42563718	75.1	11957187	84.8	91270	28.2	6.1
342_l2_s1	Illumina HiSeq X Ten	57294345	56210228	43499328	12197277	28	31285960	71.9	10421154	85.4	81555	27.8	6
342_l3_s1	Illumina HiSeq X Ten	57174294	56035581	43079817	13278294	30.8	29783999	69.1	11433597	86.1	87066	27	6
343_l1_s1	Illumina HiSeq X Ten	48378448	47621430	38252884	21738604	56.8	16471400	43.1	18462903	84.9	82512	13.5	9
344_l1_s1	Illumina HiSeq X Ten	71114696	69944355	58839161	47213075	80.2	11569196	19.7	40020722	84.8	142548	35.7	6.6
344_l2_s1	Illumina HiSeq X Ten	70485086	69302107	58370091	46983491	80.5	11329812	19.4	38966169	82.9	146153	36.4	6.6
344_l3_s1	Illumina HiSeq X Ten	60625251	59573652	49711167	37252967	74.9	12412000	25	31118836	83.5	138988	36.4	7.2
345_l1_s1	Illumina HiSeq X Ten	53582887	52838501	40931913	13617795	33.3	27296365	66.7	11521450	84.6	71630	25.8	6.8
345_l2_s1	Illumina HiSeq X Ten	74048720	73101399	56499598	17480725	30.9	38995415	69	14647771	83.8	81696	27.4	7.6
345_l3_s1	Illumina HiSeq X Ten	77845401	76826168	58972610	16728222	28.4	42222131	71.6	14373683	85.9	84966	32.2	8.7
346_l1_s1	Illumina HiSeq X Ten	65708338	65312259	49070344	20144286	41	28901178	58.9	16554375	82.2	107601	40.4	9.4
346_l2_s1	Illumina HiSeq X Ten	70224019	69752399	53791886	22194189	41.3	31569903	58.7	18582486	83.7	115511	40.1	8.9
346_l3_s1	Illumina HiSeq X Ten	64593257	64085755	48991914	22353650	45.6	26612668	54.3	18377843	82.2	106606	39	7.4
347_l1_s1	Illumina HiSeq X Ten	55798615	55274162	46214623	36488556	79	9671372	20.9	30666607	84	116333	35.3	9.8
347_l2_s1	Illumina HiSeq X Ten	38076374	37697275	31095991	24094188	77.5	6966663	22.4	20149762	83.6	94854	33.7	9.3
347_l3_s1	Illumina HiSeq X Ten	51802994	51221156	42162921	32541889	77.2	9572609	22.7	27150386	83.4	100787	32.5	8.9
348_l1_s1	Illumina HiSeq X Ten	71356706	70677132	59854720	47831467	79.9	11967689	20	35151531	73.5	111024	28.7	7.1
348_l2_s1	Illumina HiSeq X Ten	51218614	50586934	42905351	35695964	83.2	7168845	16.7	25498933	71.4	92358	23.2	5.1
348_l3_s1	Illumina HiSeq X Ten	58145743	57541338	49470144	41455213	83.8	7966755	16.1	32099255	77.4	99288	24.2	5.4
350_l1_s1	Illumina HiSeq X Ten	70341892	69132548	59407051	50902529	85.7	8427934	14.2	41451677	81.4	140791	37.3	7.7
350_l2_s1	Illumina HiSeq X Ten	42211300	41439375	35416363	30767167	86.9	4599132	13	25793207	83.8	112079	28.2	7.1
350_l3_s1	Illumina HiSeq X Ten	55612256	54480840	46637624	40671708	87.2	5903508	12.7	34518730	84.9	129010	32	6.9
351_l1_s1	Illumina HiSeq X Ten	43937938	43234843	33756726	14604546	43.3	19128298	56.7	12261653	84	61212	14.8	6.7
351_l1_s2	Illumina HiSeq X Ten	72684507	71513953	55210217	23080761	41.8	32092021	58.1	18621606	80.7	103673	20.4	9.4
351_l2_s1	Illumina HiSeq X Ten	58767290	57809878	44788388	19366290	43.2	25390403	56.7	16586220	85.6	69177	14.2	6.1
351_l2_s2	Illumina HiSeq X Ten	66076260	65081372	50257107	20924608	41.6	29297907	58.3	17416435	83.2	92907	19.3	9
351_l3_s1	Illumina HiSeq X Ten	67399859	66208841	52131200	24973598	47.9	27117541	52	20974889	84	88397	17.4	6.7
352_l1_s1	Illumina HiSeq X Ten	75704887	74590600	61334491	52206712	85.1	9036756	14.7	41940668	80.3	138811	38	10.1
352_l2_s1	Illumina HiSeq X Ten	74567709	73333356	60315100	50760010	84.2	9463319	15.7	40932198	80.6	137571	37.3	10.4
352_l3_s1	Illumina HiSeq X Ten	44677641	43905600	35843612	25197487	70.3	10603786	29.6	21314613	84.6	104371	31.9	7.3
356_l1_s1	Illumina HiSeq X Ten	48552302	47987883	34964464	8846185	25.3	26104750	74.7	7691356	87	57915	19.7	5.8
356_l2_s1	Illumina HiSeq X Ten	71675202	70964131	52870268	15716402	29.7	37130059	70.2	13364707	85	77205	22.5	6.3
356_l3_s1	Illumina HiSeq X Ten	69923582	69219083	51189119	13427959	26.2	37740366	73.7	11384796	84.8	74308	21.5	6.3
357_l1_s1	Illumina HiSeq X Ten	102867474	102240892	89875877	84466025	94	5298220	5.9	66640592	78.9	169213	43.6	8.4
357_l2_s1	Illumina HiSeq X Ten	60824428	59655763	51356062	48676043	94.8	2618907	5.1	41289828	84.8	134436	36	5.8
357_l3_s1	Illumina HiSeq X Ten	59089176	58303687	50708915	47753716	94.2	2892209	5.7	40965511	85.8	134973	36.8	6.6
358_l1_s1	Illumina HiSeq X Ten	97446332	96188552	74508863	24700413	33.1	49775176	66.8	20989744	85	103562	29.4	7.1
358_l2_s1	Illumina HiSeq X Ten	55117203	54397933	42781527	16852770	39.4	25906764	60.6	14500524	86	82139	24.5	5.7
358_l2_s2	Illumina HiSeq X Ten	73422558	72737120	57500474	24420456	42.5	33050027	57.5	19720371	80.8	85246	28.5	7
358_l3_s1	Illumina HiSeq X Ten	81433379	80256706	62944865	23003079	36.5	39911230	63.4	19030405	82.7	100209	28	6.2
360_l1_s1	Illumina HiSeq X Ten	65532954	64577659	49792198	25259486	50.7	24496413	49.2	21596618	85.5	88551	24.1	6
360_l2_s1	Illumina HiSeq X Ten	72602257	71730841	55643189	26206078	47.1	29398468	52.8	22674201	86.5	93292	24.9	6.6
360_l2_s2	Illumina HiSeq X Ten	90945464	90056108	69864872	32546505	46.6	37270580	53.4	26788315	82.3	97374	28.5	9
360_l3_s1	Illumina HiSeq X Ten	75262602	74293569	58129341	30319551	52.2	27765700	47.8	25183006	83.1	92362	24.8	6
363_l1_s1	Illumina HiSeq X Ten	55783131	54671153	45279564	34701721	76.6	10529834	23.3	28248795	81.4	104968	26.1	5.2
363_l2_s1	Illumina HiSeq X Ten	46438675	45433436	37404836	28410549	76	8953810	23.9	24001064	84.5	99941	24.5	5.5
363_l2_s2	Illumina HiSeq X Ten	55830425	54952330	45604281	35058605	76.9	10496990	23	28247238	80.6	107009	26.9	6.6
365_l1_s1	Illumina HiSeq X Ten	61540611	60903505	50758769	38129186	75.1	12594841	24.8	33097057	86.8	113729	35.2	5.5
365_l2_s1	Illumina HiSeq X Ten	56584111	55432551	44978222	30945645	68.8	14003332	31.1	26836554	86.7	108075	31.1	5
365_l3_s1	Illumina HiSeq X Ten	86649299	85040618	69197991	48416380	70	20734905	30	40784278	84.2	118147	31.3	4.8
366_l1_s1	Illumina HiSeq X Ten	48503823	47745619	40209926	33260687	82.7	6908320	17.2	28433665	85.5	119062	32.7	6.5
366_l1_s2	Illumina HiSeq X Ten	44797481	44314796	37662727	31517565	83.7	6107231	16.2	25954207	82.3	116364	35.6	8
366_l2_s1	Illumina HiSeq X Ten	48438181	47447036	39661278	33256381	83.8	6366114	16	27258847	82	114263	31.4	5.4
366_l3_s1	Illumina HiSeq X Ten	56548251	55555184	46518196	38674844	83.1	7798188	16.8	32636442	84.4	122753	31.5	5.8
368_l1_s1	Illumina HiSeq X Ten	42590647	41788169	32654919	13798256	42.2	18838853	57.7	11818960	85.7	75100	26	5
368_l2_s1	Illumina HiSeq X Ten	51037814	49973715	39204730	19336193	49.3	19844503	50.6	16302242	84.3	84753	28.6	5
368_l2_s2	Illumina HiSeq X Ten	65351489	64471334	51665679	27876465	54	23756494	46	22361920	80.2	93247	32.8	5.7
368_l3_s1	Illumina HiSeq X Ten	56277924	55225166	43998659	22632878	51.4	21337014	48.5	18412203	81.3	93103	29.8	5.1
368_l3_s2	Illumina HiSeq X Ten	56366815	55592211	44539792	24278659	54.5	20232316	45.4	19883629	81.9	89177	31.2	5.5
369_l1_s1	Illumina HiSeq X Ten	61001962	59938530	48344527	32230355	66.7	16066351	33.2	27622796	85.7	94945	21.8	5.6
369_l1_s2	Illumina HiSeq X Ten	56914875	56329936	46071086	30990301	67.3	15035231	32.6	25832721	83.4	97611	24.8	7.2
369_l2_s1	Illumina HiSeq X Ten	56953349	56132497	45896132	30283413	66	15565097	33.9	25090856	82.8	88509	17.7	5.5
372_l1_s1	Illumina HiSeq X Ten	39882925	38801648	32255781	29651823	91.9	2557305	7.9	24228746	81.7	55841	10.1	4.2
372_l2_s1	Illumina HiSeq X Ten	73278505	71793664	61186438	56568492	92.4	4530875	7.4	48259657	85.3	116848	23.7	5.3
372_l3_s1	Illumina HiSeq X Ten	42128517	40689045	33602898	30640889	91.2	2912275	8.7	25192745	82.2	58436	10	4.2
374_l1_s1	Illumina HiSeq X Ten	60509792	59630182	44395148	21435175	48.3	22927636	51.6	18636265	86.9	59313	13.1	4.3
374_l2_s1	Illumina HiSeq X Ten	44245433	43366803	32140780	15481006	48.2	16635370	51.8	13343834	86.2	48179	10.6	4
378_l1_s1	Illumina HiSeq X Ten	41737037	41007788	35356780	31978230	90.4	3346546	9.5	26011900	81.3	125991	42.5	6
378_l2_s1	Illumina HiSeq X Ten	61044329	60196216	52030243	46208822	88.8	5775100	11.1	38011665	82.3	138406	45.2	6.8
378_l3_s1	Illumina HiSeq X Ten	57417612	56568344	49029375	44362140	90.5	4621830	9.4	35894086	80.9	133647	43.6	6.4
382_l1_s1	Illumina HiSeq X Ten	59815056	59260170	46538571	24742006	53.2	21769744	46.8	20520996	82.9	110038	43.5	7.5
382_l2_s1	Illumina HiSeq X Ten	66952002	66058997	51779354	28830949	55.7	22919242	44.3	24719395	85.7	118687	42.7	6.5
382_l3_s1	Illumina HiSeq X Ten	67221551	66495073	52778507	29266028	55.5	23479773	44.5	23686110	80.9	115561	43.7	8.2
382_l3_s2	Illumina HiSeq X Ten	70617582	69836675	54912639	29865939	54.4	25012824	45.5	23018867	77.1	125411	46.5	11.4
383_l1_s1	Illumina HiSeq X Ten	83862959	82752583	66669289	44638966	67	21963098	32.9	36588294	82	129903	27.9	6.6
383_l1_s2	Illumina HiSeq X Ten	83342203	82365309	65936785	42875754	65	22995804	34.9	33927234	79.1	141424	30.6	9.5
383_l2_s1	Illumina HiSeq X Ten	95026894	93951828	75942177	50626777	66.7	25238834	33.2	40597859	80.2	151802	32.6	7.9
383_l3_s1	Illumina HiSeq X Ten	69953110	68987279	55677713	38555992	69.2	17064225	30.6	32429650	84.1	123180	27.3	6.5
387_l1_s1	Illumina HiSeq X Ten	82824524	81865485	61633645	20116474	32.6	41482552	67.3	17428740	86.6	105984	28.3	10.3
387_l2_s1	Illumina HiSeq X Ten	66539123	64851146	49486997	19183613	38.8	30270267	61.2	15719512	81.9	123497	36.1	13.3
39_l1_s1	Illumina HiSeq 4000	61962543	61244751	47975770	26266796	54.8	21670039	45.2	19434025	74	80354	19.3	5.3
39_l1_s2	Illumina HiSeq X Ten	64028828	63498344	49781765	26550889	53.3	23190871	46.6	22154153	83.4	92890	22.1	6.3
39_l2_s1	Illumina HiSeq 4000	58545837	57835931	45987932	24765333	53.9	21185259	46.1	17801711	71.9	93060	23.8	6.5
39_l2_s2	Illumina HiSeq X Ten	70797480	70164954	55123272	29147929	52.9	25931857	47	24048138	82.5	104588	26.7	8.6
390_l1_s1	Illumina HiSeq X Ten	62665636	61710061	51950682	43693326	84.1	8180624	15.8	36338755	83.2	101028	17.8	5.8
390_l2_s1	Illumina HiSeq X Ten	44749259	44118893	37307635	31053672	83.2	6198719	16.6	26494379	85.3	99563	18.6	6.1
390_l3_s1	Illumina HiSeq X Ten	60864915	60012368	50723581	41277286	81.4	9371496	18.5	34727433	84.1	117634	20.1	6.3
399_l1_s1	Illumina HiSeq 4000	81532255	80475895	63095396	35783816	56.7	27265165	43.2	27352116	76.4	99015	23.4	5.8
399_l2_s1	Illumina HiSeq 4000	49315031	48643563	38529219	21817509	56.6	16681976	43.3	17081711	78.3	86076	23	5.7
399_l3_s1	Illumina HiSeq 4000	46051866	45465926	35711280	19640662	55	16043512	44.9	15792504	80.4	78521	20.6	6
399_l3_s2	Illumina HiSeq X Ten	78148715	77349004	59683493	34660562	58.1	24980609	41.9	28377497	81.9	101006	25	6.9
401_l1_s1	Illumina HiSeq 4000	59572176	58809587	48191116	38354951	79.6	9773954	20.3	31314317	81.6	108177	35.8	6.5
401_l2_s1	Illumina HiSeq 4000	65480173	64482988	52910693	43872291	82.9	8962422	16.9	36134636	82.4	111197	29.7	5.7
401_l3_s1	Illumina HiSeq 4000	99598970	98416365	81099416	66031154	81.4	14958101	18.4	53502245	81	136509	40.2	7.1
401_l4_s1	Illumina HiSeq 4000	49711379	48896231	39508895	31539385	79.8	7920471	20	26245997	83.2	105998	35.8	5.8
403_l1_s1	Illumina HiSeq 4000	75454038	74699139	56836327	18813026	33.1	37988777	66.8	14251451	75.8	82411	20	6.9
403_l2_s1	Illumina HiSeq 4000	66909586	66156363	50977171	17813297	34.9	33131522	65	14198653	79.7	80198	19.7	6.6
403_l3_s1	Illumina HiSeq 4000	59432276	58760366	45710647	17634312	38.6	28043551	61.4	13689426	77.6	69288	17.3	5.7
414_l1_s1	Illumina HiSeq X Ten	102712996	101612715	78235505	37698727	48.2	40448183	51.7	31311815	83.1	85130	13.4	8
418_l1_s1	Illumina HiSeq X Ten	116421537	115178945	91030909	41607441	45.7	49383474	54.2	34355147	82.6	137833	38.8	5.2
418_l2_s1	Illumina HiSeq X Ten	112484247	111270895	85825573	27341258	31.9	58452685	68.1	22475901	82.2	133354	40.1	8.8
418_l3_s1	Illumina HiSeq X Ten	83238337	82527862	64483218	24562500	38.1	39895000	61.9	21061214	85.8	123760	40.7	7.9
431_l1_s1	Illumina HiSeq 4000	83729518	82803120	61217624	14942377	24.4	46250197	75.6	10794346	72.2	63021	15.9	5.4
431_l2_s1	Illumina HiSeq 4000	71716558	70853583	51645976	12151214	23.5	39474548	76.4	8596860	70.8	60432	15.2	5.7
431_l3_s1	Illumina HiSeq 4000	78364832	77354894	57152730	11767567	20.6	45363960	79.4	9524391	80.9	62333	16.2	6.2
433_l1_s1	Illumina HiSeq 4000	62143296	61316718	49790058	31222773	62.7	18517652	37.2	21782389	69.8	90745	21.3	6.1
433_l2_s1	Illumina HiSeq 4000	41552033	40870910	33078387	20284716	61.3	12760589	38.6	16115206	79.4	77234	19.2	6.1
433_l2_s2	Illumina HiSeq X Ten	55660774	54968564	44562482	27591301	61.9	16927102	38	23050553	83.5	94012	24.1	8.5
433_l3_s1	Illumina HiSeq 4000	45079360	44359279	35325193	21001567	59.5	14291510	40.5	14333919	68.2	73522	20	6.2
434_l1_s1	Illumina HiSeq 4000	60105091	59261798	47157538	22003690	46.7	25118367	53.3	15065046	68.5	86204	28.9	6.5
434_l2_s1	Illumina HiSeq 4000	80371395	79324762	61483139	23389903	38	38054965	61.9	15965055	68.3	81522	27.1	6.9
434_l3_s1	Illumina HiSeq 4000	56251790	55366162	43354230	16119581	37.2	27207553	62.8	12645906	78.4	77290	27.3	6.8
435_l1_s1	Illumina HiSeq 4000	72743994	71901303	53776948	27994626	52.1	25738628	47.9	18976837	67.8	77537	19.3	6.6
435_l2_s1	Illumina HiSeq 4000	47541484	46952867	35454964	16426738	46.3	19002644	53.6	13096257	79.7	77672	22.6	7.8
435_l2_s2	Illumina HiSeq X Ten	121992518	120666423	90882000	42024931	46.2	48792167	53.7	34487194	82.1	133175	30.2	11
435_l3_s1	Illumina HiSeq 4000	51656778	51051821	38770140	19330513	49.9	19411067	50.1	13815484	71.5	81083	24.4	7.9
435_l3_s2	Illumina HiSeq X Ten	59793481	59130143	44614844	21272783	47.7	23310732	52.2	17332261	81.5	95259	28.1	10.5
436_l1_s1	Illumina HiSeq 4000	84646174	83585826	65842524	32361717	49.1	33422399	50.8	21915964	67.7	90064	18.4	7.2
436_l2_s1	Illumina HiSeq 4000	78860349	77670607	62609854	35710573	57	26830071	42.9	24834814	69.5	90231	16.6	6.3
436_l3_s1	Illumina HiSeq 4000	93910281	92356216	72742871	30768641	42.3	41912693	57.6	21361933	69.4	121873	25.7	12.1
437_l1_s1	Illumina HiSeq 4000	49736676	49113910	39040614	19785948	50.7	19226993	49.2	13563902	68.6	75392	23.7	6.4
437_l2_s1	Illumina HiSeq 4000	62464091	61503836	49297428	23965523	48.6	25295234	51.3	18957899	79.1	95880	25.6	7.1
437_l2_s2	Illumina HiSeq X Ten	76706165	75641973	59863416	29303476	49	30516228	51	24054715	82.1	102451	29	9.6
437_l3_s1	Illumina HiSeq 4000	58338034	57605437	46521767	24709344	53.1	21777506	46.8	17394491	70.4	85971	26.9	6.6
437_l3_s2	Illumina HiSeq X Ten	71786438	71040191	56712439	30433691	53.7	26237825	46.3	24437307	80.3	96703	31.9	8.3
438_l1_s1	Illumina HiSeq X Ten	68065172	67161073	52377274	25709419	49.1	26627151	50.8	21027435	81.8	107768	32.5	11.3
438_l2_s1	Illumina HiSeq X Ten	56067216	55380916	43416971	25587778	58.9	17794411	41	21073563	82.4	84717	28.2	6.1
438_l3_s1	Illumina HiSeq X Ten	54021399	53444532	42117400	24372350	57.9	17711546	42	19914537	81.7	80666	27.7	5.7
439_l1_s1	Illumina HiSeq 4000	53241495	52266792	43540359	35099202	80.6	8388853	19.3	22937431	65.3	114510	26.2	6.1
439_l2_s1	Illumina HiSeq 4000	49890679	49115765	40437150	29723592	73.5	10671808	26.4	23089604	77.7	114793	28.2	6.3
439_l2_s2	Illumina HiSeq X Ten	60002833	59285367	48820113	36989434	75.8	11781420	24.1	29557411	79.9	118787	31	7.4
439_l3_s1	Illumina HiSeq 4000	53184126	52391652	42569777	31192843	73.3	11333502	26.6	20784187	66.6	103820	26.5	5.8
440_l1_s1	Illumina HiSeq 4000	64217087	63485947	44125850	18638547	42.2	25453936	57.7	13530091	72.6	58823	11.8	5.5
440_l1_s2	Illumina HiSeq X Ten	75477676	74683140	51494067	20777187	40.4	30679300	59.6	17126889	82.4	74614	14.3	7.1
440_l2_s1	Illumina HiSeq 4000	69233789	68407703	46763185	18178273	38.9	28553039	61.1	12916214	71	62149	13.6	6.2
440_l3_s1	Illumina HiSeq 4000	90097095	88953664	61350146	23077163	37.6	38229127	62.3	18480901	80.1	78874	13.2	5.8
444_l1_s1	Illumina HiSeq 4000	54974601	54372636	45508314	40058975	88	5365695	11.8	30694130	76.6	76779	11.8	5.7
444_l2_s1	Illumina HiSeq 4000	52842678	52234451	43749259	38533082	88.1	5134731	11.7	29214808	75.8	78549	11.5	5.6
450_l1_s1	Illumina HiSeq 4000	50169349	49530915	41894474	38284755	91.4	3550854	8.5	28068791	73.3	121627	33.3	8
450_l2_s1	Illumina HiSeq 4000	48609090	48024265	40430763	36872582	91.2	3502898	8.7	26560212	72	124517	32.7	7.8
450_l3_s1	Illumina HiSeq 4000	72048687	71216859	60176180	54132207	90	5958146	9.9	38613367	71.3	141268	33.7	8.3
457_l1_s1	Illumina HiSeq X Ten	88441065	87267017	73960630	66434730	89.8	7443222	10.1	52638490	79.2	157126	35	7.6
457_l2_s1	Illumina HiSeq X Ten	52270784	51787694	43875879	39565119	90.2	4264611	9.7	32055776	81	120925	35.2	8
458_l1_s1	Illumina HiSeq 4000	65081563	64222924	49612611	36491286	73.6	13052278	26.3	27011840	74	82123	13.6	4.9
458_l2_s1	Illumina HiSeq 4000	40733560	40188922	31471691	22979776	73	8448432	26.8	17158593	74.7	71963	13.9	5.5
458_l2_s2	Illumina HiSeq X Ten	40593819	40138762	31439637	22871297	72.8	8526733	27.1	19189530	83.9	76645	16.8	6.7
458_l3_s1	Illumina HiSeq 4000	40585281	40021639	31110987	22347856	71.8	8720966	28	16889026	75.6	73278	14.3	5.6
458_l3_s2	Illumina HiSeq X Ten	56299027	55585846	43206217	30553271	70.7	12595271	29.1	24670472	80.8	98223	17.4	6.8
459_l1_s1	Illumina HiSeq X Ten	85530263	83917995	73078722	68025223	93.1	4981631	6.8	51720150	76	157987	42.9	8.5
459_l2_s1	Illumina HiSeq X Ten	91653780	90700883	79531056	74795369	94	4658133	5.9	57156492	76.4	163294	44.5	10
459_l3_s1	Illumina HiSeq X Ten	44051417	43573221	38104556	36082292	94.7	1986691	5.2	29386593	81.4	119112	40.2	7.9
465_l1_s1	Illumina HiSeq 4000	68820224	67599415	53437204	27434081	51.3	25955629	48.6	20630542	75.2	82389	15.4	7.1
465_l2_s1	Illumina HiSeq 4000	112833754	111139217	85505994	40089973	46.9	45346001	53	30033514	74.9	106472	16.4	7.1
465_l3_s1	Illumina HiSeq 4000	81586379	80158053	62224044	28622745	46	33549048	53.9	21781675	76.1	92770	15.1	7.5
465_l3_s2	Illumina HiSeq X Ten	68096695	66563386	50852858	20842087	41	29971155	58.9	17279998	82.9	91840	16.9	9.8
470_l1_s1	Illumina HiSeq 4000	41642028	41192699	34051830	25725531	75.6	8284239	24.3	19236422	74.8	80143	21.5	7.4
470_l2_s1	Illumina HiSeq 4000	56772172	56149256	46158487	34092567	73.9	12011346	26	25641888	75.2	102297	24.1	7.5
470_l3_s1	Illumina HiSeq 4000	58941239	58185981	47329323	34395417	72.7	12880383	27.2	25457998	74	96237	22.3	6.6
475_l1_s1	Illumina HiSeq 4000	62480239	61619243	51220593	38736251	75.6	12441087	24.3	31363410	81	97512	41	5.7
475_l2_s1	Illumina HiSeq 4000	59763119	59035636	48947749	36141028	73.8	12766461	26.1	29678509	82.1	97002	41.5	5.8
475_l3_s1	Illumina HiSeq 4000	60042427	59261395	49311582	37498917	76	11768574	23.9	30547081	81.5	91876	35.8	5.8
475_l4_s1	Illumina HiSeq 4000	63689619	62720290	53019550	43814995	82.6	9157303	17.3	36280486	82.8	106935	42.7	5.2
476_l1_s1	Illumina HiSeq 4000	52666479	51960118	42446777	29266793	69	13134036	30.9	21377624	73	96667	23.7	6.4
476_l2_s1	Illumina HiSeq 4000	91010932	89331349	73683882	49290054	66.9	24314142	33	36181844	73.4	135984	30.5	8.2
476_l3_s1	Illumina HiSeq 4000	93859624	92478134	75823911	49556351	65.4	26188557	34.5	36656667	74	133672	30.2	7.8
477_l1_s1	Illumina HiSeq 4000	89263047	88352122	72649496	54643901	75.2	17914430	24.7	41780959	76.5	128636	28.8	7.6
477_l2_s1	Illumina HiSeq 4000	41771314	40956010	32885463	25230354	76.7	7614653	23.2	20139984	79.8	81365	22.6	5.2
477_l3_s1	Illumina HiSeq 4000	49664432	49009944	40397829	32182742	79.7	8160787	20.2	25283572	78.6	101581	27.4	6.5
477_l4_s1	Illumina HiSeq 4000	92485308	91335433	74400320	54693340	73.5	19614666	26.4	43418824	79.4	133923	30.4	7.1
478_l1_s1	Illumina HiSeq 4000	50864836	49863684	40096559	28059743	70	11995283	29.9	23469076	83.6	77161	24.4	5.2
478_l2_s1	Illumina HiSeq 4000	87177973	86235716	71125676	51403191	72.3	19645395	27.6	42371077	82.4	107013	32.1	6.2
478_l3_s1	Illumina HiSeq 4000	45985027	45284222	36538463	24380223	66.7	12122786	33.2	20118543	82.5	77126	29.3	5.4
478_l4_s1	Illumina HiSeq 4000	75688007	74654125	61312031	44258734	72.2	16985180	27.7	36344872	82.1	91852	25.8	5.8
479_l1_s1	Illumina HiSeq 4000	61968964	61266687	47355628	27075001	57.2	20236217	42.7	20584008	76	92968	26.9	6.8
479_l1_s2	Illumina HiSeq X Ten	73086624	72293923	55903931	30943193	55.4	24908942	44.6	25610875	82.8	107818	29.9	8.6
479_l2_s1	Illumina HiSeq 4000	60752624	59948036	46783107	26344720	56.3	20394872	43.6	20150212	76.5	93033	27.8	6.7
479_l2_s2	Illumina HiSeq X Ten	73328594	72444414	56055453	31160925	55.6	24845468	44.3	25379149	81.4	106942	32.4	8.8
479_l3_s1	Illumina HiSeq 4000	54403656	53675777	42145080	24037722	57	18066687	42.9	18221759	75.8	91011	26.4	6.7
484_l1_s1	Illumina HiSeq 4000	86104874	85077707	70467706	50193248	71.2	20220249	28.7	38418163	76.5	126825	39.3	7
484_l2_s1	Illumina HiSeq 4000	45509376	44849191	36539849	26054107	71.3	10458076	28.6	20400097	78.3	101817	34.9	5.7
484_l3_s1	Illumina HiSeq 4000	75910400	74875888	61944770	45339456	73.2	16555718	26.7	34775031	76.7	121149	36.5	5.9
485_l1_s1	Illumina HiSeq X Ten	81261034	80305456	67291657	53484390	79.5	13757416	20.4	42727385	79.9	130476	38.3	6.2
485_l2_s1	Illumina HiSeq X Ten	85362524	84220190	69303345	47552037	68.6	21699883	31.3	37242543	78.3	148284	42.6	10.8
485_l3_s1	Illumina HiSeq X Ten	37127148	36489574	30518982	23918714	78.4	6577097	21.6	19471166	81.4	107868	34.3	5.9
489_l1_s1	Illumina HiSeq 4000	71081136	70066590	57613091	41026114	71.2	16523835	28.7	31038843	75.7	93354	18.6	5
489_l2_s1	Illumina HiSeq 4000	69350213	68484369	56479913	40040419	70.9	16380066	29	30432150	76	92328	19.8	5.1
489_l3_s1	Illumina HiSeq 4000	123216686	121664179	99130936	69957912	70.6	29067557	29.3	53132850	76	116176	20.4	5.2
492_l1_s1	Illumina HiSeq 4000	60330801	59496038	49252422	37788983	76.7	11408288	23.2	28700370	76	91971	19.9	5.3
492_l2_s1	Illumina HiSeq 4000	61493249	60672529	50182081	37606342	74.9	12521178	25	28674318	76.2	93321	19.6	5.2
492_l3_s1	Illumina HiSeq 4000	67528961	66637168	54816039	41796873	76.2	12960952	23.6	32134666	76.9	96264	20.3	5.4
493_l1_s1	Illumina HiSeq 4000	51922134	51185379	41961807	29417647	70.1	12495146	29.8	22860796	77.7	90664	17.1	6.5
493_l2_s1	Illumina HiSeq 4000	80584910	79448480	65419692	47107660	72	18232964	27.9	36648675	77.8	119734	18	6.8
493_l3_s1	Illumina HiSeq 4000	55928986	55207400	45160799	33475303	74.1	11633532	25.8	26061826	77.8	93872	16.1	5.8
617_l1_s1	Illumina HiSeq 4000	35180300	34684520	27979410	19562686	69.9	8394794	30	14920443	76.3	96887	30.1	5.7
617_l2_s1	Illumina HiSeq 4000	61526183	60699400	49852830	35595390	71.4	14214951	28.5	26519357	74.5	119144	31.9	5.8
617_l3_s1	Illumina HiSeq 4000	65218345	64377705	52688188	36402757	69.1	16241625	30.8	27055546	74.3	123798	34.7	6.6
618_l1_s1	Illumina HiSeq 4000	61514153	60761795	49066800	26775236	54.6	22256965	45.4	20523963	76.7	93585	28	6.7
618_l2_s1	Illumina HiSeq 4000	60092207	59287669	46589003	22427866	48.1	24128338	51.8	17529645	78.2	105543	29.1	10
618_l2_s2	Illumina HiSeq X Ten	36497134	35848676	28463032	13759755	48.3	14682262	51.6	10280172	74.7	90454	33.3	14.2
618_l3_s1	Illumina HiSeq 4000	52300057	51690751	40999727	20241000	49.4	20730316	50.6	15539964	76.8	70085	19.8	5.7
619_l1_s1	Illumina HiSeq 4000	62166158	61432350	47360214	21960517	46.4	25365973	53.6	16578223	75.5	75346	16.5	4.9
619_l2_s1	Illumina HiSeq 4000	39373276	38926768	30083202	14068504	46.8	15994151	53.2	10735334	76.3	66554	16.8	5.1
619_l2_s2	Illumina HiSeq X Ten	67365779	66713414	51379048	25176286	49	26167750	50.9	17770882	70.6	85365	20.8	5.2
619_l3_s1	Illumina HiSeq 4000	44095771	43615923	33107147	15066961	45.5	18017572	54.4	11574606	76.8	70021	16.8	5.4
619_l3_s2	Illumina HiSeq X Ten	60831415	60258424	45789967	21049594	46	24709340	54	16866377	80.1	80548	20.3	6.1
620_l1_s1	Illumina HiSeq 4000	60368778	59569583	47864417	39094317	81.7	8713706	18.2	30016786	76.8	114814	34.3	7
620_l2_s1	Illumina HiSeq 4000	60075027	59365604	47652489	38938433	81.7	8662556	18.2	30234771	77.7	117533	37.8	7.7
620_l3_s1	Illumina HiSeq 4000	46660148	46057676	37702274	31437414	83.4	6218806	16.5	22935270	73	97921	27.7	6.5
623_l1_s1	Illumina HiSeq 4000	38253985	37505562	29771060	16074467	54	13669545	45.9	13535819	84.2	76560	21.1	5.1
623_l2_s1	Illumina HiSeq 4000	49505977	48681940	38013129	19386932	51	18593071	48.9	16303298	84.1	79667	20.3	5.7
623_l3_s1	Illumina HiSeq 4000	118336210	116400859	92008274	47235890	51.3	44688689	48.6	34373384	72.8	134125	26.2	6.5
623_l3_s2	Illumina HiSeq X Ten	64645493	63500841	49829232	24579090	49.3	25206521	50.6	17343114	70.6	120596	33	12.3
627_l1_s1	Illumina HiSeq 4000	70312312	69425606	54848836	21068184	38.4	33749479	61.5	15922388	75.6	77432	25	6.3
627_l2_s1	Illumina HiSeq 4000	74122675	73191381	58012040	19315725	33.3	38664384	66.7	15557996	80.6	92209	27.7	8
627_l3_s1	Illumina HiSeq 4000	38506192	37888320	29868088	13482845	45.1	16365723	54.8	11271615	83.6	70643	22.3	5.5
627_l3_s2	Illumina HiSeq X Ten	28879262	28572133	22773476	11324917	49.7	11432945	50.2	8990925	79.4	64939	22.7	5.5
629_l1_s1	Illumina HiSeq 4000	49902718	49339134	38310155	18594131	48.5	19691937	51.4	15409433	82.9	95927	26.7	6.2
629_l1_s2	Illumina HiSeq X Ten	45750490	45396610	35014605	17420795	49.8	17572587	50.2	14244309	81.8	91261	29.3	7.9
629_l2_s1	Illumina HiSeq 4000	53147779	52290767	40861167	18984259	46.5	21848455	53.5	15699346	82.7	79815	19.3	5.5
629_l2_s2	Illumina HiSeq X Ten	56036223	55433193	42510345	21123963	49.7	21357780	50.2	17000746	80.5	87198	23.4	6.9
629_l3_s1	Illumina HiSeq 4000	59603003	58635887	45693713	22278896	48.8	23385064	51.2	16727834	75.1	88203	23.5	5.6
629_l3_s2	Illumina HiSeq X Ten	78094561	77273242	60060508	30402869	50.6	29619802	49.3	21664422	71.3	103083	29.1	7.4
630_l1_s1	Illumina HiSeq 4000	44336418	43481380	35295862	25004360	70.8	10249055	29	18943485	75.8	91847	20.7	4.7
630_l2_s1	Illumina HiSeq 4000	51907552	50970410	41223705	28484481	69.1	12689251	30.8	23735822	83.3	93251	20	5.2
630_l3_s1	Illumina HiSeq 4000	70458865	69083225	56284887	36714513	65.2	19502160	34.6	30288263	82.5	126410	26.1	6.6
630_l3_s2	Illumina HiSeq X Ten	56005264	54867904	43890370	28210847	64.3	15627633	35.6	22617565	80.2	131329	31.9	10.8
631_l1_s1	Illumina HiSeq 4000	48935428	47927726	38629227	27136360	70.2	11459352	29.7	21599013	79.6	96418	30.3	5.5
631_l2_s1	Illumina HiSeq 4000	45661618	44799661	35693485	23256689	65.2	12406781	34.8	18694738	80.4	90170	30	5.6
631_l3_s1	Illumina HiSeq 4000	45389582	44597794	36250296	26687791	73.6	9528091	26.3	20651250	77.4	93313	30.4	5.3
631_l4_s1	Illumina HiSeq 4000	40161288	39383477	31186909	20629243	66.2	10530959	33.8	16364530	79.3	81690	29.4	5.4
632_l1_s1	Illumina HiSeq 4000	55073112	54163030	42757638	20631834	48.2	22092437	51.7	15424407	74.8	85641	21.4	5.5
632_l1_s2	Illumina HiSeq X Ten	60772227	60064548	47542104	22269465	46.8	25236346	53.1	18179575	81.6	96668	25.5	7.9
632_l2_s1	Illumina HiSeq 4000	42340281	41761800	33509933	16373937	48.9	17108559	51.1	13690404	83.6	80110	20.7	6
632_l2_s2	Illumina HiSeq X Ten	80584844	79641171	62840945	29563805	47	33227220	52.9	23772541	80.4	118664	28.1	9.4
632_l3_s1	Illumina HiSeq 4000	41955906	41167711	32932150	19437678	59	13465447	40.9	16117813	82.9	74330	20	5
633_l1_s1	Illumina HiSeq 4000	48219487	47602462	38036395	18988432	49.9	19021039	50	14510626	76.4	68784	20.6	4.9
633_l2_s1	Illumina HiSeq 4000	72737644	71821028	56794685	26611924	46.9	30144285	53.1	22058243	82.9	79962	20.2	5.1
633_l3_s1	Illumina HiSeq 4000	50016122	49353479	39504807	16514120	41.8	22965463	58.1	13914293	84.3	74077	21.8	5.7
634_l1_s1	Illumina HiSeq 4000	69618714	68756111	52575345	22717975	43.2	29813870	56.7	16992362	74.8	69641	14.5	5.9
634_l1_s2	Illumina HiSeq X Ten	91872355	91053182	69281479	29818522	43	39407433	56.9	24299986	81.5	94804	18.9	8
634_l2_s1	Illumina HiSeq 4000	64318268	63401221	47907710	19398002	40.5	28473369	59.4	16058062	82.8	68293	16.1	6.3
634_l3_s1	Illumina HiSeq 4000	59717081	58846280	45199911	18419862	40.8	26743337	59.2	15280989	83	60104	13.8	5.8
636_l1_s1	Illumina HiSeq 4000	50882728	50175728	40115030	22761074	56.7	17315981	43.2	19241001	84.5	74815	16.8	5.2
636_l1_s2	Illumina HiSeq X Ten	65674819	65176106	52392486	30526826	58.3	21817775	41.6	22205103	72.7	99102	22.3	6.9
636_l2_s1	Illumina HiSeq 4000	47028300	46330884	37796712	22290909	59	15468902	40.9	18946279	85	89627	19.4	5.4
639_l1_s1	Illumina HiSeq 4000	44992221	44090110	36034683	22491731	62.4	13512185	37.5	18448667	82	113661	33	6.6
639_l2_s1	Illumina HiSeq 4000	62011682	60864039	50384085	32675839	64.8	17664599	35.1	26898201	82.3	127185	35	6.5
639_l3_s1	Illumina HiSeq 4000	46165326	45372572	37069395	22591446	60.9	14444549	39	18719117	82.9	106288	29.2	6.3
639_l3_s2	Illumina HiSeq X Ten	79122150	78186360	63624967	39041055	61.4	24527809	38.5	32043346	82.1	125070	34.1	8.6
644_l1_s1	Illumina HiSeq 4000	47322723	46543161	37477968	20096123	53.6	17356578	46.3	16367532	81.4	83982	36.2	6.6
644_l1_s2	Illumina HiSeq X Ten	63882189	63212926	51121445	28887261	56.5	22199716	43.4	20681220	71.6	89607	41.7	8.9
644_l2_s1	Illumina HiSeq 4000	70396279	69501311	56499319	29648914	52.5	26812687	47.5	24116832	81.3	96858	37.8	6.8
644_l3_s1	Illumina HiSeq 4000	57741452	56822741	46074835	24693449	53.6	21347243	46.3	20220183	81.9	94582	39.1	8.1
644_l3_s2	Illumina HiSeq X Ten	81559518	80162305	64346631	34320460	53.3	29977846	46.6	27181153	79.2	109862	45.3	12.2
649_l1_s1	Illumina HiSeq 4000	120299264	118780917	99758474	87762883	88	11859244	11.9	18177588	20.7	103665	23.6	5.4
649_l2_s1	Illumina HiSeq 4000	102834536	101258904	85487358	74136883	86.7	11245312	13.2	15652150	21.1	104399	26.4	5.7
649_l3_s1	Illumina HiSeq 4000	107641885	106565669	87700825	66794388	76.2	20789578	23.7	9616194	14.4	61704	14.1	4.9
651_l1_s1	Illumina HiSeq 4000	57804420	57219782	42914607	23998983	55.9	18859217	44	18328894	76.4	69095	11.5	5.4
651_l1_s2	Illumina HiSeq X Ten	49348487	49073360	36478776	20133163	55.2	16300647	44.7	15568626	77.3	58655	12.5	6.5
651_l2_s1	Illumina HiSeq 4000	55979491	55138590	44288445	36669172	82.8	7542678	17	29445804	80.3	78052	14.3	5
651_l2_s2	Illumina HiSeq X Ten	66109378	65668772	53199394	44479150	83.6	8634207	16.2	36403964	81.8	84271	18.2	5.9
657_l1_s1	Illumina HiSeq 4000	41561349	40900309	34082437	23379759	68.6	10670259	31.3	19160287	82	108086	31.5	7.7
657_l1_s2	Illumina HiSeq X Ten	68294169	67393522	56094549	38902829	69.3	17139550	30.6	31714289	81.5	123688	35	9.9
657_l2_s1	Illumina HiSeq 4000	60105238	59181115	48482485	30665304	63.2	17774999	36.7	24691807	80.5	110220	30.2	7.2
657_l3_s1	Illumina HiSeq 4000	46412296	45719888	37842539	24837695	65.6	12969529	34.3	20254590	81.6	97613	27.7	6.8
659_l1_s1	Illumina HiSeq 4000	46916646	46189988	36043639	23362258	64.8	12644015	35.1	19295270	82.6	88526	22.6	5.6
659_l2_s1	Illumina HiSeq 4000	34756524	34263253	26003360	14421444	55.5	11557466	44.5	11994437	83.2	76838	19.9	5.9
659_l2_s2	Illumina HiSeq X Ten	52224659	51679191	39233256	21685452	55.3	17512008	44.6	18247497	84.2	95504	24.9	8.1
659_l3_s1	Illumina HiSeq 4000	52591514	51894155	38475941	19836438	51.6	18605728	48.4	16167115	81.5	84264	21.7	6
659_l3_s2	Illumina HiSeq X Ten	73642706	72962303	54177603	28053074	51.8	26079017	48.1	22982318	81.9	110792	27.2	8
662_l1_s1	Illumina HiSeq X Ten	73427930	71545410	57774103	38382643	66.4	19341869	33.5	28677800	74.7	145505	37.1	12.3
662_l2_s1	Illumina HiSeq X Ten	78736987	77635180	62957039	43682230	69.4	19219527	30.5	34166525	78.2	143596	32.5	10.8
669_l1_s1	Illumina HiSeq 4000	54220510	53411016	42462089	19448170	45.8	22986896	54.1	15653708	80.5	79312	27	6
669_l1_s2	Illumina HiSeq X Ten	68730400	67975881	54409547	25036339	46	29338603	53.9	20637880	82.4	91825	31.1	7.9
669_l2_s1	Illumina HiSeq 4000	42955747	42322623	34206273	17088257	50	17095475	50	13909684	81.4	79592	28.2	5.9
669_l3_s1	Illumina HiSeq 4000	65663458	64760052	52723781	27381306	51.9	25307278	48	22029835	80.5	106181	36.8	7.5
669_l3_s2	Illumina HiSeq X Ten	64680446	63837130	51654294	26702454	51.7	24917368	48.2	21490642	80.5	108529	40.1	10.3
671_l1_s1	Illumina HiSeq X Ten	54938281	54172920	44998161	36824006	81.8	8120601	18	29977659	81.4	99882	26.9	6
671_l2_s1	Illumina HiSeq X Ten	68086530	67074994	54413207	39561139	72.7	14788129	27.2	30350627	76.7	130804	33.6	11.3
671_l3_s1	Illumina HiSeq X Ten	66579000	65554551	52822256	37762781	71.5	14999484	28.4	29348461	77.7	128110	34.1	11.6
687_l1_s1	Illumina HiSeq 4000	49927346	49316702	38336965	15167344	39.6	23145846	60.4	12692904	83.7	71311	20.4	6.1
687_l1_s2	Illumina HiSeq X Ten	70537453	69804471	53861952	21657365	40.2	32170986	59.7	18231568	84.2	93984	24.2	8
687_l2_s1	Illumina HiSeq 4000	73951093	73068110	56244545	21029516	37.4	35182651	62.5	17366808	82.6	89279	23.7	6.2
687_l3_s1	Illumina HiSeq 4000	60159553	59268765	46219615	18268882	39.5	27922716	60.4	15254820	83.5	87196	22.4	6
687_l3_s2	Illumina HiSeq X Ten	70472047	69543475	53903652	20847503	38.7	33023336	61.3	17754031	85.2	96478	26.1	8.7
711_l1_s1	Illumina HiSeq 4000	63512808	62710401	52097286	34286639	65.8	17761118	34.1	26698558	77.9	117151	28.4	6.5
711_l2_s1	Illumina HiSeq 4000	77518102	76379547	62641049	41196585	65.8	21386474	34.1	31994282	77.7	121711	30.3	6.9
711_l2_s2	Illumina HiSeq X Ten	87281602	86252936	70556354	45204162	64.1	25286209	35.8	37277858	82.5	153289	36.5	10.4
711_l3_s1	Illumina HiSeq 4000	59657226	58608930	48562006	32109765	66.1	16405475	33.8	25990586	80.9	115277	28.9	6.6
713_l1_s1	Illumina HiSeq X Ten	51213750	50594850	42278503	38865370	91.9	3350062	7.9	32535564	83.7	90060	17.5	5.3
720_l1_s1	Illumina HiSeq 4000	46709495	45863117	35956928	18978012	52.8	16949822	47.1	15299177	80.6	79480	18.3	4.3
720_l1_s2	Illumina HiSeq X Ten	51714207	51012142	39421250	22475774	57	16913482	42.9	18327098	81.5	82673	19.4	4.4
720_l2_s1	Illumina HiSeq 4000	68309696	67575018	52922466	28293728	53.5	24585317	46.5	21772559	77	99748	24.5	6
720_l2_s2	Illumina HiSeq X Ten	61557088	61007557	47150063	24010882	50.9	23101549	49	17624327	73.4	108998	31.3	9.3
720_l3_s1	Illumina HiSeq 4000	57186925	56460812	44303912	21642449	48.9	22626575	51.1	16799125	77.6	89120	22.4	6
720_l3_s2	Illumina HiSeq X Ten	49999125	49472436	37656724	18264469	48.5	19363688	51.4	14977465	82	101216	27.6	9
724_l1_s1	Illumina HiSeq 4000	69283861	68044174	55465555	38546053	69.5	16863278	30.4	29029669	75.3	106383	21	5.5
724_l1_s2	Illumina HiSeq X Ten	105952234	104808896	85490331	58721938	68.7	26684467	31.2	48059578	81.8	149386	26.1	6.7
724_l2_s1	Illumina HiSeq 4000	64753946	63870458	52308039	34322839	65.6	17931670	34.3	26185844	76.3	111829	21.2	6
724_l3_s1	Illumina HiSeq 4000	74517599	73477100	59545368	36438688	61.2	23044537	38.7	29032760	79.7	122582	20.9	6.5
730_l1_s1	Illumina HiSeq 4000	73654725	72738939	58716364	27472106	46.8	31195814	53.1	20615195	75	78153	15.9	5.5
730_l2_s1	Illumina HiSeq 4000	70756866	70027963	56393480	25484078	45.2	30864978	54.7	20232541	79.4	84889	18.4	6.3
730_l2_s2	Illumina HiSeq X Ten	159976805	158649229	125101884	57222970	45.7	67783658	54.2	45957267	80.3	144518	24.9	8.3
730_l3_s1	Illumina HiSeq 4000	74594590	73634291	58740040	27283856	46.5	31409920	53.5	20640123	75.7	84792	17.6	6
733_l1_s1	Illumina HiSeq 4000	49201849	48426280	39661364	23119847	58.3	16506606	41.6	18554356	80.2	97442	28.7	5.7
733_l2_s1	Illumina HiSeq 4000	44202353	43443618	35277384	21532572	61	13712369	38.9	16458059	76.4	87474	26.6	5.7
733_l3_s1	Illumina HiSeq 4000	64298504	63749991	53179900	34164836	64.2	18965955	35.7	25989110	76.1	104328	32.2	5.8
733_l3_s2	Illumina HiSeq X Ten	76876730	76414159	63005766	41268247	65.5	21680625	34.4	33760915	81.8	111742	33.9	6.5
741_l1_s1	Illumina HiSeq 4000	54585379	53222091	43758090	31397304	71.8	12313641	28.1	23318358	74.3	92578	23.2	4.9
741_l2_s1	Illumina HiSeq 4000	51246104	50139948	41389223	28930664	69.9	12413424	30	22817159	78.9	100381	22.4	5.3
741_l2_s2	Illumina HiSeq X Ten	121226850	119698883	98687608	70907662	71.8	27675762	28	57203374	80.7	131720	27.1	6
741_l3_s1	Illumina HiSeq 4000	49826928	48631460	40049434	30160012	75.3	9845310	24.6	22400068	74.3	98321	23.5	5.1
744_l1_s1	Illumina HiSeq 4000	85071036	84132339	66429953	19795538	29.8	46604406	70.2	15480246	78.2	80955	18	5
744_l2_s1	Illumina HiSeq 4000	69493886	68631241	53975954	16070995	29.8	37880303	70.2	13178582	82	69111	15.6	5.2
744_l3_s1	Illumina HiSeq 4000	89449838	88770785	69253604	19291978	27.9	49933579	72.1	15085611	78.2	96474	22.8	6.9
750_l1_s1	Illumina HiSeq 4000	89280084	87849504	72668314	53800616	74	18787375	25.9	42374362	78.8	102832	29.2	6
750_l2_s1	Illumina HiSeq 4000	75370473	74360579	61552183	42745760	69.4	18735234	30.4	34200603	80	105745	29.2	7.3
750_l3_s1	Illumina HiSeq 4000	65678118	64472854	53494866	39672797	74.2	13762063	25.7	32465129	81.8	93382	29.1	5.4
751_l1_s1	Illumina HiSeq 4000	62020011	60679660	48193492	29735473	61.7	18408340	38.2	23455289	78.9	86625	26.7	4.6
751_l2_s1	Illumina HiSeq 4000	53227530	51960005	40978335	25547391	62.3	15390305	37.6	20174531	79	84818	27.6	4.5
751_l3_s1	Illumina HiSeq 4000	56636799	55340536	43826338	27023948	61.7	16758053	38.2	21962874	81.3	89357	27.5	4.3
753_l1_s1	Illumina HiSeq X Ten	96584802	95733298	78355585	52095525	66.5	26198405	33.4	41154031	79	135416	39.7	10
753_l2_s1	Illumina HiSeq X Ten	52049590	51398033	42459249	31529966	74.3	10894670	25.7	26169586	83	106755	30.6	5.5
753_l3_s1	Illumina HiSeq X Ten	85540039	84714026	70172844	51108269	72.8	19008506	27.1	40277991	78.8	118614	34.9	7
755_l1_s1	Illumina HiSeq 4000	71556639	70361917	58038420	41834274	72.1	16145797	27.8	32725555	78.2	89914	19.6	4.7
755_l2_s1	Illumina HiSeq 4000	58786330	57370909	47408881	34726475	73.2	12632805	26.6	27192880	78.3	82289	18.9	4.6
755_l3_s1	Illumina HiSeq 4000	56116722	54957245	45461142	33158187	72.9	12255437	27	26865106	81	81252	19.1	4.4
765_l1_s1	Illumina HiSeq 4000	80304845	79202300	60373227	18653157	30.9	41695957	69.1	14923723	80	88492	32.7	6.1
765_l2_s1	Illumina HiSeq 4000	62293693	61278085	47242951	14889130	31.5	32335016	68.4	12250576	82.3	83511	31	5.2
765_l3_s1	Illumina HiSeq 4000	63198762	62172284	47773700	14670143	30.7	33084909	69.2	11739556	80	82035	31.7	5.6
767_l1_s1	Illumina HiSeq X Ten	61083849	60273693	48576073	28162059	58	20383508	42	23480716	83.4	100784	25.3	5.3
767_l2_s1	Illumina HiSeq X Ten	68144263	67430992	54394377	28396026	52.2	25967073	47.7	22894018	80.6	118434	31.6	7.8
770_l1_s1	Illumina HiSeq 4000	66300208	65157155	53776789	45851941	85.3	7849919	14.6	36401419	79.4	103363	20.5	5.3
770_l2_s1	Illumina HiSeq 4000	73432024	71951867	59152363	50098398	84.7	8969809	15.2	39692081	79.2	103322	19.6	5
770_l3_s1	Illumina HiSeq 4000	64452271	63314403	52480560	44908077	85.6	7498746	14.3	36743226	81.8	105628	20.6	5
773_l1_s1	Illumina HiSeq 4000	53576640	52746510	41652325	26015570	62.5	15604894	37.5	20749575	79.8	89851	37	5.3
773_l1_s2	Illumina HiSeq X Ten	55128026	54576144	42882647	27122412	63.2	15728107	36.7	22275010	82.1	92228	39.4	6
773_l2_s1	Illumina HiSeq 4000	63010530	62062431	49583737	31390916	63.3	18152206	36.6	25673322	81.8	97072	36.4	5
773_l3_s1	Illumina HiSeq 4000	50832399	49972747	39699176	24865071	62.6	14802463	37.3	19845403	79.8	85257	36.1	5.3
773_l3_s2	Illumina HiSeq X Ten	106876505	105707471	83047787	52590080	63.3	30393112	36.6	43246577	82.2	103844	40.7	6.1
775_l1_s1	Illumina HiSeq 4000	44123830	43006909	34653215	22124530	63.9	12498973	36.1	17382188	78.6	79796	22.4	5.3
775_l1_s2	Illumina HiSeq X Ten	43895173	43220063	34640306	22558267	65.1	12052634	34.8	18401633	81.6	83104	23.9	5.8
775_l2_s1	Illumina HiSeq 4000	41475401	40210146	31960210	20592252	64.4	11340174	35.5	16149139	78.4	74624	21.2	5.2
775_l2_s2	Illumina HiSeq X Ten	46536750	45747209	36466666	24657675	67.6	11778375	32.3	20020893	81.2	77873	22.4	5.6
775_l3_s1	Illumina HiSeq 4000	66663870	65131153	52284599	32437143	62	19804073	37.9	26170727	80.7	97555	24.2	5.2
778_l1_s1	Illumina HiSeq 4000	83466138	82578365	67934114	42297498	62.3	25556703	37.6	33329315	78.8	131628	39	12.1
778_l1_s2	Illumina HiSeq X Ten	32171467	31737339	25670165	16365981	63.8	9272859	36.1	13746146	84	98081	40.6	15.4
778_l2_s1	Illumina HiSeq 4000	57342309	56162878	45874672	32927985	71.8	12893276	28.1	26217167	79.6	93920	29	5.5
778_l3_s1	Illumina HiSeq X Ten	85093933	84079931	66930626	40904279	61.1	25961171	38.8	32218905	78.8	95066	31.7	6.7
778_l4_s1	Illumina HiSeq X Ten	65095745	64037856	51265777	32668021	63.7	18545016	36.2	26070723	79.8	89866	28.3	5.6
778_l5_s1	Illumina HiSeq 4000	73828466	72626122	59962448	42182627	70.3	17708467	29.5	34551678	81.9	97099	30.8	5.9
779_l1_s1	Illumina HiSeq 4000	81064882	79257769	66866324	55121943	82.4	11668868	17.4	42879212	77.8	124273	35.2	6.1
779_l2_s1	Illumina HiSeq 4000	61428062	59982173	50319421	41652890	82.8	8607875	17.1	32746311	78.6	110313	31.5	5.5
779_l3_s1	Illumina HiSeq 4000	54153804	52921520	44527804	37003991	83.1	7475680	16.8	29840149	80.6	110857	35.9	5.9
779_l3_s2	Illumina HiSeq X Ten	60332146	59333577	49881522	41507705	83.2	8320907	16.7	33964939	81.8	115896	37.5	6.7
779_l4_s1	Illumina HiSeq X Ten	68376962	67431255	56092254	45530738	81.2	10499689	18.7	36840296	80.9	108133	31.8	6
779_l5_s1	Illumina HiSeq X Ten	84503333	83288552	69174450	54003852	78.1	15096177	21.8	43824146	81.2	114966	33.3	6.7
780_l1_s1	Illumina HiSeq 4000	40787782	39193290	32546935	25050075	77	7463733	22.9	19648729	78.4	95236	32.8	5.2
780_l2_s1	Illumina HiSeq 4000	79929907	78645234	66308962	49346156	74.4	16891698	25.5	38411178	77.8	125228	38	7.1
780_l3_s1	Illumina HiSeq 4000	68283051	66952337	56187224	42404034	75.5	13727708	24.4	33637430	79.3	116772	37.9	6.1
783_l1_s1	Illumina HiSeq 4000	48246474	47019615	37537503	25508796	68	11980263	31.9	20063682	78.7	78666	19.6	5
783_l2_s1	Illumina HiSeq 4000	90528273	89888943	72695357	41902048	57.6	30705032	42.2	32685080	78	132471	29.1	10.1
783_l2_s2	Illumina HiSeq X Ten	45615874	45300007	36181985	20903584	57.8	15234486	42.1	17570727	84.1	108016	29.9	12.2
783_l3_s1	Illumina HiSeq 4000	46079279	44844638	35766924	24695170	69	11026072	30.8	19882761	80.5	79467	20.9	5.1
786_l1_s1	Illumina HiSeq X Ten	94345451	93460296	77010633	66891879	86.9	9992074	13	54364909	81.3	166714	22.7	7.2
786_l2_s1	Illumina HiSeq X Ten	77564769	76786524	63603797	55308707	87	8184151	12.9	45907143	83	128519	15.4	5.8
786_l3_s1	Illumina HiSeq X Ten	78231340	77090846	62773521	53855037	85.8	8806745	14	45016969	83.6	201099	25.5	8.5
791_l1_s1	Illumina HiSeq 4000	79487358	78150469	65035140	51866959	79.8	13095573	20.1	41683293	80.4	122218	27	6.7
791_l2_s1	Illumina HiSeq 4000	70922641	69333500	57159089	44145920	77.2	12949052	22.6	34336475	77.8	113227	25.1	5.7
791_l3_s1	Illumina HiSeq 4000	56790784	55590617	46100558	36653948	79.5	9392694	20.4	28956565	79	103507	24	5.4
793_l1_s1	Illumina HiSeq X Ten	112785913	111886508	82786511	19817213	23.9	62935856	76	15909615	80.3	64122	13.8	6.5
793_l2_s1	Illumina HiSeq X Ten	84045286	83438353	61724214	14985336	24.3	46713917	75.7	12436926	83	59783	15	7.6
794_l1_s1	Illumina HiSeq X Ten	60056048	59524377	47838401	30937921	64.7	16846048	35.2	24233940	78.3	140842	29.8	11.7
794_l2_s1	Illumina HiSeq X Ten	46612454	46305263	36858102	23258966	63.1	13556173	36.8	19164126	82.4	112684	22.2	8.7
794_l3_s1	Illumina HiSeq X Ten	42793375	42419427	34785211	27111353	77.9	7631763	21.9	22139858	81.7	86553	18.9	5.4
795_l1_s1	Illumina HiSeq X Ten	58440367	57762163	46129254	30373892	65.8	15713384	34.1	25092607	82.6	87646	25.8	5.2
796_l1_s1	Illumina HiSeq 4000	93940121	92608220	75248598	51336548	68.2	23841586	31.7	40017429	78	104238	29.4	6.6
796_l2_s1	Illumina HiSeq 4000	65811784	64062456	52272397	37824877	72.4	14396444	27.5	29403571	77.7	97435	28.2	5.5
796_l3_s1	Illumina HiSeq 4000	93403182	91662309	74989966	53890832	71.9	21024747	28	41242333	76.5	105336	27.2	5.4
798_l1_s1	Illumina HiSeq 4000	67304831	66167067	52983443	23985408	45.3	28965749	54.7	18848051	78.6	105593	29.5	5.6
798_l2_s1	Illumina HiSeq 4000	77128055	75990278	60251214	25490485	42.3	34726258	57.6	20539023	80.6	102461	29.8	5.9
798_l2_s2	Illumina HiSeq X Ten	72218468	71308973	55649157	25772479	46.3	29845430	53.6	20667514	80.2	99668	34.7	7
798_l3_s1	Illumina HiSeq 4000	66444344	65318020	51987772	22753569	43.8	29202939	56.2	17931879	78.8	99316	26.5	5.3
800_l1_s1	Illumina HiSeq X Ten	67333953	66703015	54686303	40041765	73.2	14585752	26.7	33620630	84	107700	26.1	6.6
800_l2_s1	Illumina HiSeq X Ten	89030113	88123091	72042361	50464032	70	21504934	29.9	40543124	80.3	126452	30	8.6

## Sheet: S3 ATAC_metrics_mergedLibraries
Supplemental Table 3. ATAC metrics after merging libraries per donor. Columns with numbers of reads or alignments represent read pairs. Most importantly, the "number_deduplicated_alignments" is the number of high-quality, deduplicated alignments to primary nuclear chromosomes, which were used for peak calling. Because an additional round of duplicate removal was performed after merging the librar…
SJLB_ID	number_raw	number_aligned	number_nuclear	percent_nuclear	percent_chrM	number_deduplicated_alignments	percent_deduplicated	number_peaks	percentReadsInPeaks	TSS_enrichment	SMR
1	198604243	161844121	140859343	87	12.9	102541921	72.8	172928	45.69	7.038	3.53
122	333173271	257748491	97544564	37.8	62.1	75571732	77.5	194526	18.1	5.432	0.763
151	219192208	166300779	103778697	62.4	37.5	76708811	73.9	135293	28.35	5.821	2.69
152	187029183	155087916	131276449	84.6	15.2	96055854	73.2	150992	33.89	6.492	1.614
156	188073861	149766148	104017339	69.5	30.5	75470715	72.6	128458	34.27	5.349	1.699
162	290393352	228058290	108019432	47.4	52.5	86868542	80.4	198706	30.67	8.321	2.845
172	248647350	193622835	95822034	49.5	50.4	75841508	79.1	173132	31.27	7.176	1.912
174	345414387	284133209	206995701	72.9	27	155036662	74.9	243579	41	8.084	2.669
175	166992746	136914911	114415266	83.6	16.3	89020303	77.8	159527	44.14	8.609	4.41
177	260590934	199405429	105592827	53	47	79687249	75.5	168286	38.85	9.625	4.174
200	238735690	184020402	76667077	41.7	58.3	61606180	80.4	132097	29.88	6.311	3.006
201	265332155	205777022	89427537	43.5	56.5	68872836	77	165917	36.12	8.554	3.136
204	268811017	209343956	105960522	50.6	49.3	75296635	71.1	131496	27.03	7.294	1.459
217	186637844	157877643	141691476	89.7	10.1	113807576	80.3	185306	40.01	6.812	2.791
221	186979993	152144776	113717132	74.7	25.2	94013960	82.7	167076	33.48	5.358	2.253
223	177730733	132830316	58745600	44.2	55.7	50500850	86	149510	29.45	8.109	4.729
238	191399219	157427107	118005427	75	25	88725053	75.2	153013	45.49	8.285	2.352
253	234732773	181684299	115807982	63.7	36.1	96214984	83.1	166840	31.81	6.528	5.161
323	184459795	153979289	141064385	91.6	8.2	116106093	82.3	244850	20.86	5.835	2.199
325	169522325	124065273	36470323	29.4	70.6	30645361	84	122592	18.11	5.848	2.614
331	214217955	163253552	61439121	37.6	62.3	51303305	83.5	118338	27.9	6.37	1.871
332	177855576	143139546	110570606	77.2	22.7	93697435	84.7	159487	33.19	5.736	1.952
333	238597779	183861296	86979844	47.3	52.6	72534232	83.4	142247	35.89	6.295	2.833
334	163452482	135511259	125796223	92.8	7	104151765	82.8	159545	36.68	5.42	2.831
335	191422560	149952455	97744250	65.2	34.7	82608373	84.5	148690	32.99	5.321	1.753
336	202980397	161362002	104534039	64.8	35.1	88325204	84.5	144074	20.58	5.279	1.471
337	142846393	106817019	49119461	46	53.9	42645083	86.8	116404	16.73	5.174	1.796
340	206683460	159443476	61771486	38.7	61.2	52430602	84.9	178434	28.77	9.321	4.066
342	189279604	143266774	39580479	27.6	72.3	33585135	84.9	122850	30.59	5.949	2.604
343	48378448	38252884	21738604	56.8	43.1	18462903	84.9	82512	13.51	8.969	3.167
344	202225033	166920419	131449533	78.7	21.2	108317845	82.4	186656	38.39	6.502	2.676
345	205477008	156404121	47826742	30.6	69.4	40178451	84	111495	30.85	7.525	1.972
346	200525614	151854144	64692125	42.6	57.3	52922923	81.8	152863	42.56	8.255	1.768
347	145677983	119473535	93124633	77.9	21.9	76778620	82.4	146120	35.89	9.024	2.667
348	180721063	152230215	124982644	82.1	17.8	92029739	73.6	148639	28.51	5.741	1.967
350	168165448	141461038	122341404	86.5	13.4	99976735	81.7	169820	34.8	6.988	2.055
351	308865854	236143638	102949803	43.6	56.3	84539117	82.1	213805	23.99	7.238	1.471
352	194950237	157493203	128164209	81.4	18.5	101684727	79.3	186460	38.54	9.031	4.123
356	190151086	139023851	37990546	27.3	72.6	32325015	85.1	108400	24.55	6.111	1.765
357	222781078	191940854	180895784	94.2	5.6	145598293	80.5	192279	41.43	6.678	2.402
358	307419472	237735729	88976718	37.4	62.5	73020452	82.1	143499	31.12	6.349	1.564
360	304343277	233429600	114331620	49	50.9	94465496	82.6	157824	29.19	6.546	1.726
363	158052231	128288681	98170875	76.5	23.4	79340202	80.8	153074	28.98	5.57	2.364
365	204774021	164934982	117491211	71.2	28.7	99600252	84.8	150661	35.17	4.936	2.165
366	198287736	164052127	136709477	83.3	16.6	111498606	81.6	169788	35.4	5.982	1.501
368	271624689	212063779	107922451	50.9	49	86724039	80.4	134206	33.57	5.122	2.255
369	174870186	140311745	93504069	66.6	33.3	77350247	82.7	141841	24.15	5.969	0.936
372	155289947	127045117	116861204	92	7.9	97380852	83.3	140591	19.49	4.726	2.148
374	104755225	76535928	36916181	48.2	51.7	31963999	86.6	79064	14.06	4.16	1.354
378	160198978	136416398	122549192	89.8	10.1	97757419	79.8	165815	45.78	6.174	2.948
382	264606191	206009071	112704922	54.7	45.2	87202787	77.4	161799	46.09	7.472	2.955
383	332185166	264225964	176697489	66.9	33	139503458	79	224817	33.48	7.042	3.415
387	149363647	111120642	39300087	35.4	64.6	32880679	83.7	148462	33.77	11.276	3.894
39	255334688	198868739	106730947	53.7	46.3	81496265	76.4	153863	26.81	6.386	1.575
390	168279810	139981898	116024284	82.9	17	96890336	83.5	175273	22.23	5.905	4.19
399	255047867	197019388	111902549	56.8	43.1	87468189	78.2	150133	26.88	5.995	2.719
401	274362698	221710120	179797781	81.1	18.8	142224837	79.1	177992	37.77	5.935	4.302
403	201795900	153524145	54260635	35.3	64.6	42010374	77.4	124936	22.16	6.291	2.014
414	102712996	78235505	37698727	48.2	51.7	31311815	83.1	85130	13.4	7.998	3.317
418	312144121	241339700	93511199	38.7	61.2	76860998	82.2	169259	42.06	6.376	2.193
431	233810908	170016330	38861158	22.9	77.1	28857454	74.3	105053	19.47	5.647	2.867
433	204435463	162756120	100100357	61.5	38.4	74351587	74.3	150947	25.31	6.586	1.767
434	196728276	151994907	61513174	40.5	59.5	43348954	70.5	113553	30.3	6.566	2.851
435	353728255	263498896	127049591	48.2	51.7	95235096	75	183174	29.71	8.499	2.443
436	257416804	201195249	98840931	49.1	50.8	67617295	68.4	155075	22.49	7.683	2.876
437	319031404	251435664	128197982	51	48.9	95540345	74.5	153929	31.34	7.288	2.726
438	178153787	137911645	75669547	54.9	45.1	61570003	81.4	123795	31.63	6.706	2.871
439	216319133	175367399	133005071	75.8	24	94486486	71	166987	31.58	6.238	1.778
440	299025647	203733248	80671170	39.6	60.3	61564533	76.3	155219	18.15	6.025	1.918
444	107817279	89257573	78592057	88.1	11.8	59823492	76.1	116493	13.61	5.617	2.723
450	170827126	142501417	129289544	90.7	9.1	91727006	70.9	180076	35.49	7.698	2.778
457	140711849	117836509	105999849	90	9.9	83843210	79.1	176658	36.86	7.559	2.245
458	243293250	186841143	135243486	72.4	27.5	103467785	76.5	193760	21.2	5.683	2.254
459	221235460	190714334	178902884	93.8	6.1	134158210	75	196446	44.41	8.374	3.486
465	331337052	252020100	116988886	46.4	53.5	87979942	75.2	208017	21.13	7.266	1.54
470	157355439	127539640	94213515	73.9	26	69797400	74.1	148420	25.54	6.942	1.678
475	245975404	202499474	156191191	77.1	22.8	123707941	79.2	137906	42.2	5.28	2.443
476	237537035	191954570	128113198	66.7	33.2	93019948	72.6	187833	31.73	7.288	3.091
477	273184101	220333108	166750337	75.7	24.2	128062520	76.8	196336	31.39	6.459	3.466
478	259715843	209072729	148101891	70.8	29.1	120135785	81.1	139545	30.55	5.482	1.959
479	323540462	248243199	139561561	56.2	43.7	106570837	76.4	166219	32.27	7.158	2.851
484	207524650	168952325	121586811	72	28	92107401	75.8	149907	39.27	6.032	2.02
485	203750706	167113984	124955141	74.8	25.2	97715157	78.2	171377	41.24	6.866	2.946
489	263648035	213223940	151024445	70.8	29.1	113966289	75.5	160490	22.9	5.018	1.088
492	189353011	154250542	117192198	76	23.9	89003815	75.9	140294	22.74	5.17	1.766
493	188436030	152542298	110000610	72.1	27.8	85166394	77.4	183398	21.04	6.213	1.683
617	161924828	130520428	91560833	70.2	29.8	67843004	74.1	150456	35.36	5.95	2.312
618	210403551	165118562	83203857	50.4	49.5	62534117	75.2	151835	30.51	7.436	3.062
619	273832399	207719578	97321862	46.9	53.1	72638552	74.6	150137	23.75	5.247	1.565
620	167103953	133219180	109470164	82.2	17.7	81949758	74.9	148339	35.75	6.89	2.226
623	270741665	209621695	107276379	51.2	48.7	77530606	72.3	175363	28.83	6.393	2.956
627	211820441	165502440	65191671	39.4	60.6	51085268	78.4	121268	28.12	6.185	2.297
629	342534774	262450493	128804913	49.1	50.9	97972340	76.1	175124	30.78	6.345	2.44
630	222708099	176694824	118414201	67	32.9	92683091	78.3	177592	28.18	6.068	2.111
631	180147916	141759917	97710083	68.9	31	75957197	77.7	133106	32.82	5.22	2.999
632	280726370	219582770	108276719	49.3	50.6	84609963	78.1	179491	28.55	6.405	2.107
633	170973253	134335887	62114476	46.2	53.7	50262352	80.9	108841	23.36	5.115	1.507
634	285526418	214964445	90354361	42	57.9	71449661	79.1	151904	20.31	6.427	2.403
636	163585847	130304228	75578809	58	41.9	59447309	78.7	145824	23.37	5.788	2.129
639	232291379	187113130	116800071	62.4	37.5	93647035	80.2	174924	36.25	6.796	2.618
644	320902161	255520198	137646207	53.9	46.1	102882444	74.7	149081	42.4	7.693	2.432
649	330775685	272946657	228694154	83.8	16.1	43235958	18.9	136788	25.53	5.315	2.236
651	229241776	176881222	125280468	70.8	29	95591612	76.3	130654	17.79	5.454	2.293
657	216373052	176502010	117785587	66.7	33.2	93642930	79.5	175504	34.52	7.632	1.567
659	260132049	193933799	107358666	55.4	44.6	86825925	80.9	161679	28.09	6.504	1.423
662	152164917	120731142	82064873	68	31.9	62097629	75.7	193387	36.63	11.077	2.19
669	296250561	235455984	115656526	49.1	50.8	89878870	77.7	148630	36.35	7.099	2.269
671	189603811	152233624	114147926	75	24.9	88336988	77.4	173107	33.62	8.305	3.418
687	325047492	248566729	96970610	39	60.9	79683459	82.2	169705	28.54	6.69	2.764
711	287969738	233856695	152797151	65.3	34.6	118105247	77.3	216343	35.35	7.177	2.859
713	51213750	42278503	38865370	91.9	7.9	32535564	83.7	90060	17.46	5.258	1.794
720	335476536	257411343	133665314	51.9	48	102485528	76.7	187475	29.49	5.827	1.722
724	314507640	252809293	168029518	66.5	33.4	129995474	77.4	233811	27.9	6.029	2.463
730	378982986	298951768	137463010	46	53.9	105136409	76.5	202177	25.03	6.606	0.955
733	234579436	191124414	120085502	62.8	37.1	92715371	77.2	148656	34.39	5.826	1.608
741	276885261	223884355	161395642	72.1	27.8	123250984	76.4	171646	28.57	5.308	1.853
744	244014760	189659511	55158511	29.1	70.9	43623033	79.1	139415	22.82	5.572	1.89
750	230328675	187715363	136219173	72.6	27.3	107520517	78.9	135127	30.77	5.889	2.496
751	171884340	132998165	82306812	61.9	38	65162557	79.2	118805	29.99	4.346	1.846
753	234174431	190987678	134733760	70.5	29.4	105974760	78.7	160432	37.6	7.18	1.743
755	186459691	150908443	109718936	72.7	27.2	86345958	78.7	120482	21.54	4.499	0.858
765	205797300	155389878	48212430	31	68.9	38644753	80.2	113996	34.88	5.54	2.378
767	129228112	102970450	56558085	54.9	45	46185385	81.7	136609	30.63	6.256	1.874
770	204184503	165409712	140858416	85.2	14.7	112053918	79.6	170001	23.75	4.965	3.041
773	329424100	256865672	161984049	63.1	36.9	127380505	78.6	137540	41.08	5.302	2.264
775	242695024	190004996	122369867	64.4	35.5	96614386	79	137658	26.43	5.22	1.434
778	396998058	317637802	207346391	65.3	34.6	159962896	77.1	179162	35.62	6.437	3.013
779	409859189	336861775	274821119	81.6	18.3	211532699	77	175296	36.66	5.687	2.348
780	189000740	155043121	116800265	75.3	24.6	90213359	77.2	147105	38.84	6.021	2.797
783	230469900	182181769	113009598	62	37.8	88363810	78.2	174969	28.18	6.902	3.263
786	250141560	203387951	176055623	86.6	13.3	144128724	81.9	319847	28.25	6.874	3.452
791	207200783	168294787	132666827	78.8	21.1	103970008	78.4	159533	27.9	5.829	1.259
793	196831199	144510725	34802549	24.1	75.9	28314021	81.4	94100	16.56	6.946	1.625
794	149461877	119481714	81308240	68.1	31.8	65144012	80.1	202363	28.2	7.705	1.807
795	58440367	46129254	30373892	65.8	34.1	25092607	82.6	87646	25.81	5.154	2.072
796	253155087	202510961	143052257	70.6	29.3	109193358	76.3	136802	30.09	5.651	1.866
798	283095698	220871586	98001941	44.4	55.6	75762886	77.3	148927	33.33	5.796	2.384
800	156364066	126728664	90505797	71.4	28.5	73724683	81.5	154432	30.09	7.431	2.153

## Sheet: S4A_caQTL_by_ATAC_PCs
Supplemental Table 4A. Number of unique caPeaks identified using different numbers of ATAC principal components (PCs) as covariates when running FastQTL. A caPeak is defined as an ATAC peak with a significant caQTL (FDR<5%). Results are shown for two analyses: testing variants within 1 kb of peak centers and testing variants within 1 Mb of peak centers.
number_ATAC_PCs	number_caPeaks_1kb	number_caPeaks_1Mb
0	21460	11929
1	24502	13978
2	26926	15492
3	28357	16378
4	29381	16991
5	29858	17446
6	30499	17836
7	31061	18201
8	31700	18679
9	32363	19095
10	32817	19427
11	33214	19705
12	33552	19955
13	33852	20101
14	34038	20306
15	34291	20491
16	34541	20630
17	34805	20719
18	34835	20855
19	35016	20911
20	35134	20946
21	35186	20977
22	35251	20990
23	35254	21061
24	35306	21095
25	35361	21074
26	35261	21067
27	35388	21099
28	35329	21140
29	35333	21098
30	35418	21101
31	35392	21066
32	35358	21075
33	35362	21026
34	35185	20790
35	35020	20810

## Sheet: S4B_ATAC_PC_correlations
Supplemental Table 4B. Correlation (Pearson's r^2) of ATAC principal components (PCs) with ATAC technical factors and donor phenotypes. The ATAC metrics are in the rows ranging from "number_raw" to "SMR" and are described in table S3. Sex and genotype PCs were not included because ATAC PCs were calculated on the accessibility data after regressing out sex and the first 2 genotype PCs. BMI: body m…
variable	PC1	PC2	PC3	PC4	PC5	PC6	PC7	PC8	PC9	PC10	PC11	PC12	PC13	PC14	PC15	PC16	PC17	PC18	PC19	PC20	PC21	PC22	PC23	PC24	PC25
number_raw	0.01	0.02	0.03	0.01	0.01	0	0	0.02	0.01	0.02	0.03	0	0.06	0	0.02	0	0.02	0.01	0.04	0	0	0	0.02	0.01	0
number_aligned	0.02	0.01	0.03	0	0.01	0	0	0.02	0.01	0.03	0.04	0	0.04	0	0.02	0	0.02	0.01	0.04	0.01	0	0	0.03	0.01	0
number_nuclear	0.08	0.07	0.08	0	0	0	0.01	0	0.01	0	0.03	0.01	0.01	0.01	0.01	0.01	0.01	0	0.01	0.01	0	0	0.05	0	0
percent_nuclear	0.06	0.23	0.04	0.02	0.03	0.01	0.01	0.01	0	0	0.02	0	0.12	0	0	0.03	0	0.01	0.01	0.01	0	0	0.03	0	0
percent_chrM	0.06	0.23	0.04	0.02	0.03	0.01	0.01	0.01	0	0	0.02	0	0.12	0	0	0.03	0	0.01	0.01	0.01	0	0	0.03	0	0
number_deduplicated_alignments	0.09	0.1	0.03	0	0	0	0	0	0	0.01	0.06	0	0.01	0.02	0	0.01	0	0	0	0.01	0	0	0.02	0	0.01
percent_deduplicated	0	0	0.06	0	0	0	0.01	0.02	0.04	0	0	0	0	0.01	0.12	0	0.01	0	0.09	0.01	0	0.03	0.09	0	0.04
number_peaks	0	0.08	0.01	0.04	0.05	0.01	0.01	0	0.01	0.04	0.02	0	0.02	0.03	0	0.02	0	0	0.02	0.01	0	0.05	0.04	0.01	0.02
percentReadsInPeaks	0.68	0.02	0	0.12	0.02	0.02	0	0.01	0.01	0	0.01	0.01	0	0.02	0.01	0	0	0	0	0	0	0	0	0.01	0.01
TSS_enrichment	0.01	0	0.03	0.12	0.15	0	0.04	0.01	0.02	0.03	0.18	0	0.02	0.14	0.04	0	0.01	0.04	0.02	0.02	0	0	0	0	0.01
SMR	0.03	0.04	0.04	0.05	0.04	0.01	0.01	0.01	0.01	0	0.21	0	0.01	0.09	0.02	0.03	0.01	0.01	0	0.02	0	0.05	0.03	0.03	0.01
age_years	0.02	0.03	0.13	0.07	0	0.04	0	0.1	0	0.04	0	0.01	0.01	0.03	0.17	0.01	0.02	0.01	0.07	0.03	0	0	0.01	0.05	0
height_inches	0	0.01	0.07	0.04	0.01	0.07	0	0	0	0.01	0	0.01	0.03	0.01	0.05	0	0.02	0.01	0.04	0.01	0	0	0	0	0.08
weight_lbs	0	0.01	0.26	0	0	0.02	0.03	0.02	0	0.07	0	0.02	0	0	0.02	0	0.04	0	0	0	0.02	0	0	0	0.07
BMI	0	0.01	0.26	0	0.01	0.01	0.04	0.01	0	0.09	0	0.01	0	0	0	0	0.03	0	0	0	0.01	0	0	0	0.04

## Sheet: S5 pilot_caQTL_replication
Supplemental Table 5. Replication of caQTLs from a 20-donor pilot liver study (Currin et al. 2021, AJHG) by the current study. The 2,437 pilot caQTLs that were replicated by the current study are shown. For a pilot caQTL to be replicated, the caPeak had to overlap a caPeak in the current study and the LD r2 between the lead variants in the pilot and current studies had to be >= 0.8. CaPeaks were …
pilot_caPeak_ID	pilot_caPeak_position	pilot_lead	CS_caPeak_ID	CS_caPeak_position	CS_lead	LD_r2	supporting_CS_caPeaks
peak100008	chr19:46425844-46427156	rs10418662:C:A	peak157374	chr19:46426617-46426945	rs12052158:C:T	0.999	peak157374
peak100010	chr19:46470838-46471829	rs3826851:G:A	peak157376	chr19:46471132-46471745	rs3826855:G:C	0.977	peak157376
peak100211	chr19:47633189-47633944	rs10407603:A:G	peak157654	chr19:47633480-47633913	rs10407603:A:G	1	peak157654
peak100214	chr19:47661156-47661556	rs2081179:C:G	peak157658	chr19:47661243-47661534	rs11397008:A:AG	0.99	peak157658
peak100327	chr19:48684167-48685076	rs2098709:G:A	peak157845	chr19:48684356-48684728	rs2098709:G:A	1	peak157845
peak100372	chr19:48896176-48896610	rs56146968:A:G	peak157908	chr19:48896181-48896532	rs73061692:T:C	0.998	peak157908
peak100399	chr19:49052158-49052710	rs34977649:C:T	peak157953	chr19:49052327-49052690	rs34977649:C:T	1	peak157953
peak100427	chr19:49224730-49225233	rs62127956:G:A	peak157995	chr19:49224887-49225202	rs62127956:G:A	1	peak157995
peak100441	chr19:49387929-49388435	rs7251704:T:G	peak158014	chr19:49387952-49388363	rs35768917:T:C	0.997	peak158014
peak100567	chr19:50352221-50352587	rs4801831:A:G	peak158260	chr19:50352255-50352577	rs1377814:G:A	0.999	peak158260
peak100783	chr19:53431323-53432681	rs2126955:C:T	peak158628	chr19:53431384-53432642	rs2126955:C:T	1	peak158628
peak100845	chr19:54164724-54165003	rs891055:C:G	peak158716	chr19:54164737-54164979	rs891055:C:G	1	peak158716
peak100956	chr19:55165943-55167299	rs3848619:C:T	peak158901	chr19:55166012-55167180	rs3848619:C:T	1	peak158901
peak101132	chr19:57790842-57791446	rs8100470:C:G	peak159184	chr19:57790858-57791222	rs8103933:A:T	1	peak159184
peak101159	chr19:58150266-58151012	rs34003091:T:C	peak159224	chr19:58150326-58150992	rs35081008:C:T	0.999	peak159224
peak101327	chr2:1060329-1061354	rs11901776:A:G	peak159578	chr2:1060375-1060690	rs11901776:A:G	1	peak159578,peak159579
peak101466	chr2:1974175-1974775	rs72767321:T:G	peak159911	chr2:1974373-1974736	rs72767321:T:G	1	peak159911
peak101517	chr2:2621647-2622200	rs2100268:T:C	peak160035	chr2:2621878-2622143	rs2100268:T:C	1	peak160035
peak101591	chr2:3305911-3306311	rs10182368:C:T	peak160254	chr2:3305949-3306288	rs10186914:A:G	0.975	peak160254
peak101803	chr2:6187799-6188694	rs9677536:G:A	peak160717	chr2:6188018-6188305	chr2:6187692:AT:A:AT:A	0.992	peak160717,peak160718
peak101804	chr2:6202400-6203913	rs12987564:A:G	peak160720	chr2:6202751-6203117	rs13017595:C:G	0.997	peak160720,peak160721
peak101887	chr2:7736554-7737260	rs1656168:G:A	peak160888	chr2:7736843-7737204	rs1656168:G:A	1	peak160888
peak101913	chr2:8132244-8133144	rs11691677:T:C	peak160944	chr2:8132350-8132964	rs34427770:A:G	0.988	peak160944
peak101962	chr2:8389418-8390477	rs13009356:G:A	peak161018	chr2:8390193-8390438	rs13008689:G:A	0.999	peak161018
peak102003	chr2:8574027-8575128	rs10170998:A:G	peak161079	chr2:8574660-8575014	rs10171280:A:G	0.97	peak161079
peak102006	chr2:8583292-8584554	rs59996641:A:T	peak161081	chr2:8583322-8584216	rs59996641:A:T	1	peak161081
peak102013	chr2:8624820-8626219	rs3888889:A:T	peak161091	chr2:8625420-8626115	rs3888889:A:T	1	peak161091
peak10221	chr1:117671673-117672540	rs12759825:G:C	peak16348	chr1:117671808-117672504	rs7520590:G:T	0.995	peak16348
peak102262	chr2:10594104-10594876	rs6735074:T:G	peak161529	chr2:10594498-10594838	rs10210859:C:T	0.999	peak161529
peak102287	chr2:10843809-10844595	rs34413173:G:A	peak161570	chr2:10844024-10844449	rs34413173:G:A	1	peak161570
peak102291	chr2:10880375-10881187	rs7577665:G:A	peak161580	chr2:10880411-10880844	rs7604815:C:T	0.945	peak161580
peak102403	chr2:11697451-11698977	rs11687567:G:C	peak161761	chr2:11697497-11697824	rs11687567:G:C	1	peak161761,peak161762
peak102550	chr2:13103790-13104458	rs16859772:A:G	peak161998	chr2:13104156-13104420	rs16859783:T:C	1	peak161998
peak102582	chr2:14272121-14273218	rs11685736:A:G	peak162053	chr2:14272421-14272991	rs10192263:T:A	0.995	peak162053
peak102632	chr2:15169401-15171031	rs10179243:G:A	peak162146	chr2:15169645-15170568	rs10179251:G:A	0.999	peak162146,peak162147
peak102798	chr2:17034966-17035573	rs1515966:T:C	peak162422	chr2:17035036-17035401	rs1515966:T:C	1	peak162422
peak102869	chr2:18104203-18105239	rs6738939:G:A	peak162544	chr2:18104526-18105068	rs2345091:C:T	0.998	peak162544
peak102943	chr2:19261863-19262875	rs1727203:C:A	peak162657	chr2:19262118-19262597	rs1727203:C:A	1	peak162657
peak102944	chr2:19271816-19272500	rs851361:A:G	peak162660	chr2:19271977-19272440	rs851358:C:G	0.998	peak162660
peak103023	chr2:20121754-20122706	rs6717177:G:A	peak162791	chr2:20121895-20122497	rs6717027:G:A	0.996	peak162791
peak103030	chr2:20170738-20171966	rs11693335:G:A	peak162806	chr2:20171347-20171910	rs907866:G:A	0.874	peak162806
peak103031	chr2:20172174-20172803	rs2090034:G:A	peak162807	chr2:20172338-20172737	rs907866:G:A	0.91	peak162807
peak103038	chr2:20186344-20186821	rs4358082:C:T	peak162816	chr2:20186451-20186772	rs4358082:C:T	1	peak162816
peak103041	chr2:20194116-20194556	rs75286961:C:A	peak162821	chr2:20194167-20194457	rs75286961:C:A	1	peak162821
peak103058	chr2:20291688-20293690	rs4666300:C:T	peak162851	chr2:20292742-20293555	rs4666300:C:T	1	peak162851
peak103231	chr2:21422166-21424244	rs34120876:G:A	peak163087	chr2:21422189-21422624	rs34468506:A:G	0.985	peak163087,peak163088
peak103291	chr2:23212022-23212689	rs4665568:G:C	peak163185	chr2:23212036-23212638	rs4665568:G:C	1	peak163185
peak10387	chr1:119779802-119780747	rs17258467:G:C	peak16620	chr1:119779842-119780545	rs17258467:G:C	1	peak16620
peak103890	chr2:28951763-28953223	rs12475073:C:G	peak164126	chr2:28951806-28952638	rs10166581:A:G	0.999	peak164126
peak104290	chr2:33671181-33671882	rs6543734:G:A	peak164791	chr2:33671231-33671627	rs6543734:G:A	1	peak164791
peak104310	chr2:33949168-33949960	rs7605928:T:G	peak164819	chr2:33949405-33949771	rs7605928:T:G	1	peak164819
peak104319	chr2:34241896-34243481	rs17014956:G:C	peak164835	chr2:34241951-34243110	rs17014956:G:C	1	peak164835
peak104332	chr2:34704520-34705024	rs17015531:C:T	peak164860	chr2:34704536-34704911	rs17015531:C:T	1	peak164860
peak104333	chr2:34705325-34706629	rs13030159:C:T	peak164861	chr2:34705508-34706208	rs13030159:C:T	1	peak164861,peak164862
peak104366	chr2:35651545-35652393	rs35297210:C:G	peak164924	chr2:35651744-35652329	rs35297210:C:G	1	peak164924
peak104426	chr2:36473269-36473552	rs848552:C:G	peak165007	chr2:36473268-36473534	rs848552:C:G	1	peak165007
peak104459	chr2:36819975-36820603	rs974967:T:G	peak165062	chr2:36820171-36820437	rs974967:T:G	1	peak165062
peak104460	chr2:36820979-36822220	rs974966:A:G	peak165063	chr2:36821068-36821670	rs974966:A:G	1	peak165063
peak104462	chr2:36858372-36859636	rs2245109:G:C	peak165066	chr2:36858858-36859269	rs2245109:G:C	1	peak165066
peak104476	chr2:37005015-37005750	rs1123648:C:T	peak165081	chr2:37005058-37005491	rs1123648:C:T	1	peak165081
peak104515	chr2:37533290-37533776	rs4670727:G:A	peak165128	chr2:37533286-37533555	rs4670726:C:G	0.996	peak165128
peak104586	chr2:38091912-38092994	rs149148:G:A	peak165211	chr2:38092066-38092852	rs162330:C:A	0.995	peak165211
peak104692	chr2:38810401-38810998	rs3112215:G:A	peak165357	chr2:38810537-38810901	rs3112215:G:A	1	peak165357
peak104886	chr2:41886368-41887273	rs17028942:G:A	peak165607	chr2:41886829-41887177	rs17028942:G:A	1	peak165607
peak105272	chr2:44786001-44786800	rs6729800:G:A	peak166110	chr2:44786044-44786724	rs6729800:G:A	1	peak166110
peak105315	chr2:45311484-45311925	rs2278063:C:G	peak166188	chr2:45311580-45311907	rs2278063:C:G	1	peak166188
peak105402	chr2:46034497-46034961	rs34156674:C:G	peak166314	chr2:46034564-46034870	rs34156674:C:G	1	peak166314
peak105447	chr2:46266036-46266462	rs7607691:T:A	peak166373	chr2:46266067-46266463	rs4952814:T:C	0.985	peak166373
peak105472	chr2:46339783-46340500	rs4953353:G:T	peak166408	chr2:46339868-46340462	rs4953353:G:T	1	peak166408
peak105536	chr2:46793462-46794483	rs36071056:C:T	peak166500	chr2:46793503-46794305	rs36071056:C:T	1	peak166500
peak105594	chr2:47071346-47072561	rs7609058:G:C	peak166584	chr2:47071476-47071799	rs7609058:G:C	1	peak166584
peak105657	chr2:47685499-47686641	rs9789343:T:C	peak166706	chr2:47685543-47685822	rs9789342:T:C	0.998	peak166706,peak166707
peak105829	chr2:50536145-50536704	rs10175222:G:T	peak166957	chr2:50536418-50536680	rs10175222:G:T	1	peak166957
peak105918	chr2:52904324-52905334	rs13403709:C:T	peak167119	chr2:52904581-52904932	rs13404094:G:A	0.997	peak167119
peak105952	chr2:53460260-53461010	rs1402901:A:G	peak167162	chr2:53460349-53460709	rs1402901:A:G	1	peak167162
peak105974	chr2:53829166-53830045	rs805438:T:A	peak167196	chr2:53829249-53829609	rs805439:C:T	0.997	peak167196,peak167197
peak105980	chr2:53867145-53867583	rs805380:G:C	peak167203	chr2:53867160-53867542	rs805380:G:C	1	peak167203
peak106244	chr2:56460133-56461119	rs1465360:A:G	peak167572	chr2:56460231-56460913	rs2193484:A:G	0.835	peak167572
peak106255	chr2:56768658-56769602	rs11125652:G:A	peak167588	chr2:56768915-56769495	rs10169833:C:G	0.974	peak167588
peak106257	chr2:56813138-56813868	rs11125660:A:G	peak167590	chr2:56813506-56813819	rs10199089:G:A	0.986	peak167590
peak106518	chr2:61356028-61357208	rs4597510:T:C	peak167963	chr2:61356141-61356918	rs4597510:T:C	1	peak167963
peak106596	chr2:62292110-62294325	rs116029002:T:C	peak168069	chr2:62293429-62294170	rs116029002:T:C	1	peak168069,peak168068
peak106606	chr2:62381733-62382502	rs11125916:C:A	peak168085	chr2:62381762-62382402	rs11125916:C:A	1	peak168085
peak106615	chr2:62466630-62468416	rs4413143:A:G	peak168100	chr2:62467049-62468389	rs4671424:C:G	0.989	peak168100
peak106962	chr2:65537342-65537601	rs11126042:A:T	peak168585	chr2:65537279-65537581	rs11126042:A:T	1	peak168585
peak107040	chr2:67038759-67039042	rs1420363:A:C	peak168707	chr2:67038767-67039030	rs1420363:A:C	1	peak168707
peak107094	chr2:68196160-68196617	rs4671879:T:G	peak168780	chr2:68196215-68196476	rs4671879:T:G	1	peak168780
peak107240	chr2:69356283-69356879	rs13389936:A:G	peak168964	chr2:69356338-69356827	rs13389936:A:G	1	peak168964
peak107244	chr2:69429051-69429439	rs59129812:T:C	peak168972	chr2:69429142-69429411	rs59129812:T:C	1	peak168972
peak107409	chr2:70900042-70901851	rs13004912:G:A	peak169207	chr2:70900157-70900887	rs13004912:G:A	1	peak169207,peak169208
peak107566	chr2:72255358-72255954	rs6709493:G:T	peak169492	chr2:72255569-72255926	rs6709233:G:C	1	peak169492
peak107612	chr2:73020778-73022470	rs10191665:T:C	peak169563	chr2:73020807-73021299	rs10191665:T:C	1	peak169563,peak169564,peak169565
peak107668	chr2:73716377-73717605	rs11891140:A:G	peak169645	chr2:73716927-73717297	rs7591112:C:T	0.999	peak169645
peak107714	chr2:74119907-74120865	rs1667619:G:T	peak169711	chr2:74119953-74120735	rs1667618:T:G	0.982	peak169711
peak107799	chr2:75041738-75042375	rs10202905:T:C	peak169857	chr2:75041880-75042245	rs10202914:T:A	0.998	peak169857
peak107879	chr2:76517492-76518103	rs6760681:A:G	peak169982	chr2:76517548-76517904	rs6760681:A:G	1	peak169982
peak107904	chr2:77519728-77520846	rs6547148:T:C	peak170025	chr2:77520052-77520556	rs6547148:T:C	1	peak170025
peak108105	chr2:83251059-83251816	rs6754220:T:C	peak170364	chr2:83251467-83251768	rs6754220:T:C	1	peak170364
peak108106	chr2:83253544-83254203	rs4129273:T:C	peak170365	chr2:83253650-83254171	rs12623705:G:C	1	peak170365
peak108228	chr2:85175018-85176351	rs2583543:A:C	peak170551	chr2:85175382-85176307	rs2583543:A:C	1	peak170551
peak108330	chr2:85698881-85699189	rs1866141:T:C	peak170692	chr2:85698883-85699140	rs57942827:T:TGCG	0.991	peak170692
peak108376	chr2:85930532-85931374	rs13401298:C:A	peak170756	chr2:85930725-85931183	rs13401298:C:A	1	peak170756
peak108586	chr2:88169690-88171383	rs6547758:G:C	peak171016	chr2:88169960-88170918	rs6547757:G:C	0.998	peak171016
peak108996	chr2:96714222-96714985	rs56361249:T:G	peak171550	chr2:96714246-96714645	rs56361249:T:G	1	peak171550,peak171551
peak109113	chr2:98419951-98420611	rs17031139:C:T	peak171734	chr2:98420030-98420341	rs17031146:A:G	1	peak171734
peak10941	chr1:148334011-148335674	rs539114:A:T	peak17032	chr1:148334248-148335621	rs539114:A:T	1	peak17032
peak109446	chr2:101630121-101630859	rs17025908:G:A	peak172254	chr2:101630137-101630776	rs12475863:T:C	0.997	peak172254
peak109448	chr2:101644803-101645596	rs4851475:T:G	peak172257	chr2:101644970-101645381	rs4851475:T:G	1	peak172257
peak109573	chr2:102208846-102209138	rs11123913:T:C	peak172415	chr2:102208887-102209102	rs11123913:T:C	1	peak172415
peak109627	chr2:102765092-102765553	rs2732841:T:C	peak172488	chr2:102765110-102765412	rs2540295:G:A	1	peak172488
peak109813	chr2:105522457-105523173	rs1878828:A:G	peak172800	chr2:105522628-105523051	rs1878828:A:G	1	peak172800
peak109882	chr2:106098028-106098407	rs12612312:G:C	peak172923	chr2:106098086-106098373	rs10191679:C:T	0.976	peak172923
peak109896	chr2:106261664-106262419	rs2889663:C:T	peak172950	chr2:106261828-106262345	rs11124097:A:G	0.921	peak172950
peak109897	chr2:106262503-106263157	rs11124097:A:G	peak172951	chr2:106262561-106262872	rs11124097:A:G	1	peak172951
peak109899	chr2:106269493-106270784	rs67196165:C:G	peak172953	chr2:106269581-106270757	rs11694824:A:G	0.882	peak172953
peak109904	chr2:106295861-106297269	rs10176510:G:A	peak172960	chr2:106295930-106296349	rs10176510:G:A	1	peak172960
peak109911	chr2:106366951-106367607	rs13413684:T:C	peak172974	chr2:106367058-106367377	rs13413684:T:C	1	peak172974
peak110007	chr2:108270344-108272250	rs6735166:G:A	peak173148	chr2:108270789-108271475	rs6735166:G:A	1	peak173148
peak110108	chr2:109242247-109243328	rs13005715:T:C	peak173318	chr2:109242717-109243214	rs13005715:T:C	1	peak173318
peak110127	chr2:109331887-109333137	rs60240458:A:C	peak173346	chr2:109332260-109332871	rs4676079:G:A	0.999	peak173346
peak110129	chr2:109345695-109346090	rs6738796:C:T	peak173350	chr2:109345699-109345976	rs6710178:A:G	0.996	peak173350
peak110137	chr2:109398997-109399388	rs4676085:T:C	peak173367	chr2:109399044-109399347	rs4676288:A:G	0.998	peak173367
peak110268	chr2:111234998-111236392	rs1464023:A:G	peak173577	chr2:111235226-111235640	rs1464023:A:G	1	peak173577,peak173578
peak110343	chr2:111910597-111911271	rs4848861:T:C	peak173646	chr2:111910660-111911191	rs7349221:A:G	0.999	peak173646
peak110465	chr2:112924892-112925220	rs4589758:T:C	peak173820	chr2:112924911-112925188	rs13023868:G:A	0.995	peak173820
peak110479	chr2:113111512-113112488	rs58153729:G:A	peak173844	chr2:113111635-113112299	rs58153729:G:A	1	peak173844
peak110503	chr2:113211317-113212923	rs931472:C:T	peak173876	chr2:113212162-113212554	rs931472:C:T	1	peak173876
peak110510	chr2:113235130-113235903	rs7589901:A:C	peak173885	chr2:113235198-113235875	rs7576384:C:G	0.999	peak173885
peak110605	chr2:114330223-114330611	rs13393987:T:C	peak174004	chr2:114330282-114330544	rs13009115:T:A	0.994	peak174004
peak110661	chr2:116465123-116465505	rs2130978:C:T	peak174110	chr2:116465133-116465413	rs2130978:C:T	1	peak174110
peak110664	chr2:116479277-116479660	rs17552148:G:T	peak174113	chr2:116479333-116479622	rs17552148:G:T	1	peak174113
peak110834	chr2:119223065-119224752	rs3795927:G:A	peak174443	chr2:119223421-119224694	rs2289894:G:T	0.996	peak174443
peak111085	chr2:121210627-121211822	rs4073806:A:G	peak174894	chr2:121210656-121211647	rs4073806:A:G	1	peak174894
peak111276	chr2:124242656-124243221	rs779988:T:G	peak175220	chr2:124242702-124243165	rs779988:T:G	1	peak175220
peak111297	chr2:124625392-124625951	rs1902004:C:A	peak175252	chr2:124625543-124625911	rs1454133:G:T	0.998	peak175252
peak111300	chr2:124646988-124648026	rs4848960:C:T	peak175256	chr2:124647239-124647952	rs4848959:C:G	0.999	peak175256
peak111343	chr2:126041376-126042664	rs17695598:C:T	peak175342	chr2:126041660-126041995	rs4144047:C:T	0.999	peak175342,peak175343
peak111372	chr2:126586267-126586995	rs6706862:C:T	peak175404	chr2:126586322-126586765	rs62157360:G:T	1	peak175404
peak111524	chr2:127695506-127696038	rs10928779:C:T	peak175698	chr2:127695525-127695983	rs10928779:C:T	1	peak175698
peak111586	chr2:128292081-128293618	rs6761320:C:T	peak175787	chr2:128292313-128293479	rs6761320:C:T	1	peak175787
peak111587	chr2:128298653-128299890	rs7595689:A:G	peak175789	chr2:128299048-128299795	rs8179790:T:C	0.999	peak175789
peak111589	chr2:128304663-128305542	rs73956995:C:G	peak175791	chr2:128304849-128305514	rs73956995:C:G	1	peak175791
peak11160	chr1:150667368-150668193	rs11807058:G:A	peak17229	chr1:150667525-150668175	rs11807058:G:A	1	peak17229
peak111767	chr2:129936386-129936701	rs6760544:A:C	peak176208	chr2:129936395-129936671	rs6760544:A:C	1	peak176208
peak111892	chr2:131681643-131683322	rs6720375:G:C	peak176439	chr2:131681742-131682977	rs6720375:G:C	1	peak176439,peak176440
peak111894	chr2:131721317-131722212	rs6735207:G:T	peak176443	chr2:131721490-131722018	rs6735207:G:T	1	peak176443
peak111980	chr2:132650952-132651608	rs17396537:G:C	peak176541	chr2:132651157-132651587	rs4954352:G:C	0.988	peak176541
peak112014	chr2:133414818-133415219	rs10184630:G:A	peak176609	chr2:133414856-133415185	rs17745851:G:A	0.981	peak176609
peak112128	chr2:134396479-134397468	rs1561455:G:A	peak176775	chr2:134396567-134397000	rs1010241:C:A	0.924	peak176775
peak112131	chr2:134410860-134411194	rs3791304:A:G	peak176779	chr2:134410879-134411234	rs3791304:A:G	1	peak176779
peak112167	chr2:134782572-134783213	rs7599054:A:G	peak176838	chr2:134782721-134783136	rs7599054:A:G	1	peak176838
peak112386	chr2:137952402-137953403	rs3113240:A:G	peak177162	chr2:137952531-137953198	rs3113240:A:G	1	peak177162
peak112418	chr2:138434182-138435056	rs13409820:C:G	peak177220	chr2:138434615-138435023	rs13409820:C:G	1	peak177220
peak112468	chr2:139465813-139466178	rs6430837:C:G	peak177291	chr2:139465912-139466121	rs67143693:T:C	0.983	peak177291
peak112526	chr2:140998570-140999024	rs1949871:C:T	peak177368	chr2:140998620-140998945	rs1997079:T:A	0.994	peak177368
peak112534	chr2:141329417-141330497	rs2683849:C:A	peak177380	chr2:141329893-141330331	rs79687661:A:AT	0.992	peak177380
peak112535	chr2:141330788-141331528	rs2714185:C:T	peak177381	chr2:141331056-141331482	rs79687661:A:AT	0.992	peak177381
peak112551	chr2:141699173-141700033	rs12373690:A:G	peak177406	chr2:141699612-141699966	rs12373690:A:G	1	peak177406
peak112615	chr2:142904095-142905186	rs6429993:T:C	peak177503	chr2:142904830-142905163	rs6429992:T:C	0.997	peak177503
peak11283	chr1:151809501-151810105	rs10494269:C:G	peak17405	chr1:151809676-151810008	rs10494269:C:G	1	peak17405
peak113047	chr2:149816874-149817690	rs13018598:T:C	peak178108	chr2:149816984-149817541	rs13018598:T:C	1	peak178108
peak11309	chr1:151953384-151954016	rs6682605:C:T	peak17443	chr1:151953438-151953784	rs111692556:TTTAA:T	1	peak17443
peak113125	chr2:150591909-150592446	rs2340859:T:A	peak178215	chr2:150592010-150592238	rs2340859:T:A	1	peak178215
peak113253	chr2:152409860-152410678	rs13405110:A:G	peak178380	chr2:152410080-152410650	rs13405110:A:G	1	peak178380
peak11339	chr1:152188625-152189583	rs10788823:T:G	peak17479	chr1:152188638-152189546	rs10788823:T:G	1	peak17479
peak113457	chr2:155633974-155634532	rs1400703:C:T	peak178651	chr2:155634042-155634427	rs1400703:C:T	1	peak178651
peak11360	chr1:152517073-152517823	rs548252:C:T	peak17519	chr1:152517191-152517771	rs548252:C:T	1	peak17519
peak11361	chr1:152519916-152520250	rs499697:G:A	peak17520	chr1:152519931-152520202	rs499697:G:A	1	peak17520
peak113668	chr2:158497087-158498096	rs55905216:G:C	peak178936	chr2:158497474-158497897	rs55905216:G:C	1	peak178936
peak113715	chr2:158944271-158945405	rs55670401:G:A	peak179022	chr2:158944568-158944894	rs7560785:G:A	0.898	peak179022
peak113775	chr2:159371519-159371873	rs12477183:G:A	peak179128	chr2:159371592-159371854	rs12477183:G:A	1	peak179128
peak113828	chr2:159903355-159905291	rs3806603:T:C	peak179193	chr2:159903433-159905258	rs3806603:T:C	1	peak179193
peak113850	chr2:160181176-160181811	rs35056657:A:G	peak179225	chr2:160181201-160181700	rs34153167:A:G	0.999	peak179225
peak113965	chr2:161244392-161245579	rs11678980:G:A	peak179367	chr2:161244477-161245324	rs11678980:G:A	1	peak179367
peak114113	chr2:163451726-163452049	rs12466627:G:A	peak179558	chr2:163451748-163452001	rs13004615:A:C	0.999	peak179558
peak114185	chr2:164554446-164554894	rs3920334:C:T	peak179664	chr2:164554533-164554838	rs3920334:C:T	1	peak179664
peak114226	chr2:164765909-164766788	rs355842:C:T	peak179716	chr2:164766200-164766604	rs355840:C:G	0.998	peak179716
peak114308	chr2:165766355-165767011	rs13430211:C:G	peak179831	chr2:165766404-165766782	rs12692777:T:A	0.999	peak179831
peak114309	chr2:165768496-165769293	rs11674422:C:T	peak179832	chr2:165768736-165769141	rs11674422:C:T	1	peak179832
peak114458	chr2:168375279-168375516	rs35985041:A:G	peak180034	chr2:168375291-168375506	rs35985041:A:G	1	peak180034
peak11446	chr1:153617470-153617961	rs9330298:C:A	peak17670	chr1:153617575-153617921	rs9330298:C:A	1	peak17670
peak114703	chr2:171491273-171491634	rs17287442:G:C	peak180363	chr2:171491190-171491618	rs112604249:A:T	1	peak180363
peak114704	chr2:171521989-171524314	rs960749:G:A	peak180365	chr2:171524033-171524250	rs6749185:G:C	0.987	peak180364,peak180365
peak114760	chr2:172329602-172330707	rs4350710:G:A	peak180444	chr2:172329662-172330615	rs4350710:G:A	1	peak180444
peak115026	chr2:175027752-175028985	rs1150186:T:C	peak180829	chr2:175028131-175028672	rs1150186:T:C	1	peak180829
peak115169	chr2:177332078-177333403	rs13025552:C:G	peak181043	chr2:177333012-177333392	rs13025552:C:G	1	peak181043
peak115191	chr2:177622608-177622932	rs6756918:A:T	peak181075	chr2:177622631-177622880	rs6756918:A:T	1	peak181075
peak115193	chr2:177633989-177635174	rs11682717:C:G	peak181077	chr2:177634341-177634631	rs11682717:C:G	1	peak181077,peak181078
peak115212	chr2:177799587-177799917	rs13022805:G:A	peak181104	chr2:177799626-177799886	rs13022805:G:A	1	peak181104
peak115265	chr2:178363179-178363665	rs1865326:T:A	peak181174	chr2:178363244-178363642	rs1865326:T:A	1	peak181174
peak115289	chr2:178819564-178820446	rs10497526:C:T	peak181202	chr2:178820042-178820350	rs1489486:A:G	0.996	peak181202
peak115333	chr2:179332972-179333296	rs4130070:T:C	peak181263	chr2:179332990-179333274	rs4130070:T:C	1	peak181263
peak115357	chr2:179595334-179595855	rs3106712:T:C	peak181298	chr2:179595372-179595653	rs3106712:T:C	1	peak181298
peak115367	chr2:179726463-179726864	rs1964081:T:C	peak181316	chr2:179726484-179726781	rs1964081:T:C	1	peak181316
peak115381	chr2:179852756-179853752	rs1383414:T:C	peak181334	chr2:179853161-179853407	rs6725456:A:G	0.999	peak181334
peak115425	chr2:180662725-180663532	rs16867348:G:A	peak181396	chr2:180663027-180663388	rs16867348:G:A	1	peak181396
peak11582	chr1:154626923-154628340	rs35504625:C:G	peak17860	chr1:154626960-154628247	rs35504625:C:G	1	peak17860
peak1159	chr1:10795491-10796989	rs761124:G:T	peak2286	chr1:10796102-10796926	rs761124:G:T	1	peak2286
peak115932	chr2:188605899-188606958	rs12988921:T:A	peak182118	chr2:188606265-188606902	rs13012993:C:T	1	peak182118
peak116128	chr2:190718455-190719473	rs7574452:G:A	peak182404	chr2:190718771-190719255	rs7574452:G:A	1	peak182404
peak116139	chr2:190811015-190811584	rs6711950:G:A	peak182413	chr2:190811156-190811533	rs7564069:G:A	0.964	peak182413
peak116213	chr2:191280866-191281795	rs34840299:G:C	peak182515	chr2:191281038-191281712	rs34840299:G:C	1	peak182515
peak116286	chr2:191703160-191703857	rs80113293:G:A	peak182613	chr2:191703171-191703723	rs12464838:G:T	0.999	peak182613
peak116506	chr2:196068171-196069447	rs13028754:T:C	peak182930	chr2:196068250-196069257	rs13028754:T:C	1	peak182930
peak116509	chr2:196088165-196088589	rs10931719:T:G	peak182935	chr2:196088260-196088526	rs10931719:T:G	1	peak182935
peak116826	chr2:200050718-200051881	rs3115413:C:A	peak183376	chr2:200050935-200051575	rs3115413:C:A	1	peak183376
peak116919	chr2:200619196-200619624	rs6724797:A:G	peak183505	chr2:200619227-200619594	rs6724797:A:G	1	peak183505
peak116944	chr2:200762219-200762492	rs73991105:G:T	peak183547	chr2:200762227-200762469	rs73991105:G:T	1	peak183547
peak117150	chr2:203122289-203123032	rs17474056:C:T	peak183838	chr2:203122465-203122948	rs17474056:C:T	1	peak183838
peak117151	chr2:203123316-203124345	rs17474056:C:T	peak183839	chr2:203123429-203123702	rs17474056:C:T	1	peak183839
peak117152	chr2:203126568-203127257	rs11689534:T:G	peak183841	chr2:203126978-203127220	rs11689534:T:G	1	peak183841
peak117330	chr2:205169952-205170781	rs1468997:A:G	peak184083	chr2:205170418-205170726	rs17188687:G:A	0.991	peak184083
peak117538	chr2:207681241-207682110	rs2663863:C:T	peak184379	chr2:207681403-207681988	rs2551916:T:G	0.999	peak184379
peak11778	chr1:156276455-156277461	rs7542045:G:C	peak18171	chr1:156276986-156277418	rs7542045:G:C	1	peak18171
peak11781	chr1:156291162-156292125	rs3795728:G:C	peak18175	chr1:156291198-156292106	rs3795728:G:C	1	peak18175
peak117972	chr2:214174586-214175095	rs12994113:A:G	peak185018	chr2:214174618-214174968	rs12994113:A:G	1	peak185018
peak117973	chr2:214180302-214181550	rs34604325:C:T	peak185019	chr2:214180751-214181012	rs7581545:T:C	0.873	peak185019,peak185020
peak11804	chr1:156480500-156481199	rs1185700:G:A	peak18216	chr1:156480764-156481070	rs1171557:C:T	0.871	peak18216
peak118088	chr2:215831241-215831921	rs10804244:G:A	peak185185	chr2:215831323-215831842	rs10804244:G:A	1	peak185185
peak118299	chr2:217773435-217774722	rs7563530:C:T	peak185531	chr2:217774215-217774678	rs78488367:G:GA	0.976	peak185530,peak185531
peak118444	chr2:218607401-218608307	rs611203:G:A	peak185735	chr2:218607437-218608077	rs611203:G:A	1	peak185735
peak118746	chr2:222854784-222855258	rs13009194:A:T	peak186245	chr2:222854861-222855185	rs13009194:A:T	1	peak186245
peak11885	chr1:157085309-157085867	rs7551464:G:A	peak18340	chr1:157085428-157085824	rs7551464:G:A	1	peak18340
peak118993	chr2:226087049-226088654	rs4675046:A:G	peak186591	chr2:226087126-226088615	rs12620348:A:C	0.984	peak186591
peak119007	chr2:226307237-226308608	rs2713556:C:T	peak186608	chr2:226307380-226308194	rs2713556:C:T	1	peak186608
peak119021	chr2:226454390-226455291	rs7570776:A:G	peak186625	chr2:226454557-226454962	rs7570776:A:G	1	peak186625,peak186626
peak119163	chr2:227881893-227882779	rs4973006:T:G	peak186830	chr2:227881928-227882456	rs7579859:G:A	1	peak186830
peak119244	chr2:229246417-229246779	rs55923451:G:A	peak186986	chr2:229246440-229246702	rs56179221:T:C	0.999	peak186986
peak119313	chr2:230075942-230076577	rs55994636:A:T	peak187080	chr2:230076067-230076435	rs55994636:A:T	1	peak187080
peak119315	chr2:230097378-230098238	rs13384765:A:G	peak187083	chr2:230097417-230097799	rs12694831:C:T	0.996	peak187084,peak187083
peak119319	chr2:230166547-230167152	rs13026878:G:C	peak187093	chr2:230166616-230167083	rs2162479:G:C	0.999	peak187093
peak119348	chr2:230472292-230473193	rs1649890:A:C	peak187128	chr2:230472675-230473005	rs1649890:A:C	1	peak187128
peak119396	chr2:230902171-230902640	rs13390217:A:T	peak187204	chr2:230902215-230902482	rs13390217:A:T	1	peak187204
peak119472	chr2:231411838-231412896	rs1868454:A:C	peak187322	chr2:231411875-231412682	rs35771536:C:G	0.927	peak187322
peak119495	chr2:231613387-231615088	rs1347344:G:A	peak187363	chr2:231613682-231614960	rs13031890:G:A	0.998	peak187363
peak119525	chr2:231791144-231791473	rs17199663:T:C	peak187407	chr2:231791162-231791452	rs17199663:T:C	1	peak187407
peak119621	chr2:232655137-232656186	rs13395911:A:T	peak187572	chr2:232655365-232655796	rs13395911:A:T	1	peak187572
peak119692	chr2:233264642-233265091	rs12994997:G:A	peak187689	chr2:233264656-233265044	rs6708373:A:G	0.999	peak187689
peak119792	chr2:234021885-234023000	rs601129:T:C	peak187855	chr2:234022447-234022831	rs585284:A:G	0.996	peak187855
peak119856	chr2:234672477-234673071	rs4663156:C:T	peak187973	chr2:234672512-234672888	rs4663156:C:T	1	peak187973
peak119861	chr2:234692278-234692544	rs4663473:C:T	peak187981	chr2:234692280-234692538	rs4663473:C:T	1	peak187981
peak119862	chr2:234710618-234711268	rs1992434:C:T	peak187987	chr2:234710666-234711131	rs1992434:C:T	1	peak187987
peak119994	chr2:235937170-235937766	rs4663220:G:T	peak188258	chr2:235937179-235937523	rs4663220:G:T	1	peak188258
peak12001	chr1:158117819-158118338	rs12733819:G:T	peak18531	chr1:158117839-158118231	rs12733819:G:T	1	peak18531
peak120052	chr2:236702791-236703877	rs2720157:G:A	peak188424	chr2:236702793-236703044	rs2600782:T:C	0.991	peak188424,peak188425
peak120068	chr2:236781885-236783874	rs999033:T:C	peak188449	chr2:236782937-236783375	rs999033:T:C	1	peak188448,peak188449,peak188450
peak120096	chr2:236940895-236941931	rs4514829:T:C	peak188497	chr2:236941602-236941900	rs893422:A:G	1	peak188497
peak120110	chr2:237024990-237026186	rs2318131:A:C	peak188520	chr2:237025024-237025561	rs2318131:A:C	1	peak188520,peak188521
peak120197	chr2:237651839-237652883	rs2029771:A:C	peak188665	chr2:237652157-237652597	rs2029771:A:C	1	peak188665
peak120203	chr2:237682959-237683739	rs10198748:A:G	peak188673	chr2:237683152-237683454	rs6743986:G:T	0.998	peak188673
peak12026	chr1:158527203-158527534	rs10797023:T:C	peak18561	chr1:158527261-158527501	rs1578761:G:A	1	peak18561
peak120380	chr2:239246157-239247090	rs62188572:G:C	peak189082	chr2:239246391-239246750	rs62188571:G:A	0.997	peak189082
peak120382	chr2:239252817-239253183	rs4852035:A:G	peak189085	chr2:239252882-239253131	rs4852035:A:G	1	peak189085
peak120559	chr2:240896575-240897201	rs10933516:T:C	peak189544	chr2:240896825-240897158	rs12105931:A:C	1	peak189544
peak120618	chr2:241298342-241299245	rs59104589:C:T	peak189681	chr2:241298536-241298832	rs59104589:C:T	1	peak189681
peak120622	chr2:241314742-241316680	rs12624195:G:C	peak189688	chr2:241314833-241316603	rs12624195:G:C	1	peak189688
peak120655	chr2:241595648-241596030	rs62193003:G:A	peak189753	chr2:241595667-241596066	rs62193003:G:A	1	peak189753
peak120664	chr2:241672647-241673663	rs7421:T:C	peak189777	chr2:241672907-241673517	rs1130906:A:G	0.945	peak189777
peak120696	chr2:241891808-241893077	rs66521038:C:T	peak189834	chr2:241891998-241892393	rs34623950:A:G	1	peak189834,peak189835
peak120726	chr20:164455-165048	rs6086539:A:G	peak189896	chr20:164613-164950	rs6086539:A:G	1	peak189896
peak120864	chr20:1317434-1318151	rs4814116:A:G	peak190114	chr20:1317584-1318131	rs4814116:A:G	1	peak190114
peak12088	chr1:159594772-159595961	rs2244698:C:T	peak18637	chr1:159594850-159595195	rs1156411:C:A	0.902	peak18637,peak18638
peak120969	chr20:2242713-2243036	rs6047591:A:G	peak190275	chr20:2242768-2243018	rs6047591:A:G	1	peak190275
peak121046	chr20:3067287-3067978	rs6115776:A:C	peak190398	chr20:3067353-3067910	rs6115778:A:C	0.999	peak190398
peak12115	chr1:159821207-159821831	rs60205880:G:C	peak18679	chr1:159821280-159821819	rs60205880:G:C	1	peak18679
peak121185	chr20:4130693-4131210	rs1741276:C:G	peak190609	chr20:4130940-4131203	rs1741278:A:C	0.92	peak190609
peak121197	chr20:4221018-4222938	rs835875:C:T	peak190625	chr20:4222268-4222754	rs835875:C:T	1	peak190625
peak121374	chr20:5804100-5805450	rs374486:C:T	peak190884	chr20:5804392-5805234	rs415023:G:A	0.999	peak190884
peak121375	chr20:5819062-5819581	rs1294705:G:C	peak190885	chr20:5819081-5819438	rs1294705:G:C	1	peak190885
peak121484	chr20:7257472-7259012	rs6085954:G:C	peak191028	chr20:7257780-7258416	rs6085954:G:C	1	peak191028
peak121485	chr20:7264102-7264851	rs8121934:C:G	peak191029	chr20:7264132-7264525	rs8121934:C:G	1	peak191029
peak121489	chr20:7308230-7308484	rs6054903:A:T	peak191033	chr20:7308242-7308477	rs9789818:T:A	0.995	peak191033
peak121508	chr20:7723232-7723864	rs6133481:C:A	peak191063	chr20:7723288-7723711	rs6133481:C:A	1	peak191063
peak121540	chr20:8095542-8096520	rs2056934:G:A	peak191112	chr20:8095579-8095882	rs2056934:G:A	1	peak191112,peak191113
peak121716	chr20:10429557-10429839	rs6077783:A:G	peak191331	chr20:10429579-10429830	rs17452140:C:T	0.998	peak191331
peak121870	chr20:12644403-12644966	rs6033471:A:C	peak191563	chr20:12644487-12644888	rs35829545:G:T	0.979	peak191563
peak121934	chr20:13452600-13453369	rs2070334:C:T	peak191663	chr20:13452663-13453235	rs2070334:C:T	1	peak191663
peak121989	chr20:14576177-14576820	rs2423831:A:G	peak191752	chr20:14576527-14576803	chr20:14576725:AC:A:AC:A	0.993	peak191752
peak122005	chr20:14732163-14732840	rs16994856:T:C	peak191776	chr20:14732176-14732726	rs16994856:T:C	1	peak191776
peak122107	chr20:16607300-16608730	rs945239:C:T	peak191949	chr20:16607569-16608611	rs6105637:T:A	0.972	peak191949
peak122208	chr20:17863484-17864364	rs2618566:G:T	peak192102	chr20:17863605-17864182	rs2618566:G:T	1	peak192102
peak122217	chr20:17910415-17911520	rs12480210:G:A	peak192117	chr20:17910574-17911398	rs72623541:A:G	0.988	peak192117
peak122267	chr20:18526748-18527286	rs6112009:C:T	peak192194	chr20:18526788-18527132	rs6112010:C:A	0.999	peak192194
peak122580	chr20:22413013-22413330	rs1212572:C:G	peak192720	chr20:22413015-22413313	rs1212572:C:G	1	peak192720
peak12269	chr1:160925364-160925661	rs78978905:T:A	peak18905	chr1:160925391-160925645	rs78978905:T:A	1	peak18905
peak122717	chr20:23570151-23570872	rs3004135:C:T	peak192949	chr20:23570166-23570558	rs2983619:T:A	0.999	peak192949
peak122887	chr20:25256179-25257079	rs6115107:A:G	peak193331	chr20:25256324-25256886	rs6115107:A:G	1	peak193331
peak122894	chr20:25309435-25311092	rs6037083:T:C	peak193348	chr20:25309691-25311064	rs1888998:A:G	0.993	peak193348
peak123242	chr20:32685632-32686486	rs28456308:C:T	peak193871	chr20:32685749-32686435	rs28494701:G:A	0.97	peak193871
peak123271	chr20:33105465-33106899	rs2424962:A:G	peak193944	chr20:33106047-33106530	rs2424959:G:A	0.999	peak193944
peak123328	chr20:33666332-33668260	rs7263119:G:T	peak194027	chr20:33666568-33668257	rs7263119:G:T	1	peak194027
peak123416	chr20:34405333-34405665	rs35937789:C:G	peak194154	chr20:34405318-34405635	rs35937789:C:G	1	peak194154
peak1235	chr1:11676328-11676784	rs2336030:C:T	peak2458	chr1:11676347-11676761	rs2336030:C:T	1	peak2458
peak123717	chr20:37242436-37242844	rs6073782:A:C	peak194628	chr20:37242492-37242773	rs6073782:A:C	1	peak194628
peak123718	chr20:37243248-37244629	rs1001351:T:C	peak194629	chr20:37243293-37244346	rs1001351:T:C	1	peak194629
peak123762	chr20:37615615-37616280	rs6067042:G:A	peak194714	chr20:37615865-37616129	rs7362456:C:T	0.999	peak194714
peak123764	chr20:37641044-37641824	rs169160:C:T	peak194718	chr20:37641186-37641619	rs169159:G:T	0.997	peak194718
peak12379	chr1:161725754-161727779	rs11585450:G:C	peak19041	chr1:161725851-161727547	rs1875763:C:G	0.99	peak19041
peak123901	chr20:38770583-38771517	rs6128947:C:T	peak194958	chr20:38770621-38771375	rs6128952:G:A	0.998	peak194958
peak123903	chr20:38790493-38790775	rs6101226:A:C	peak194964	chr20:38790493-38790717	rs6101226:A:C	1	peak194964
peak123959	chr20:39627717-39628221	rs805935:G:A	peak195058	chr20:39627792-39628182	rs805935:G:A	1	peak195058
peak123961	chr20:39647803-39648875	rs294426:A:C	peak195061	chr20:39648143-39648837	rs294426:A:C	1	peak195061
peak123987	chr20:40006211-40006901	rs6101806:G:A	peak195094	chr20:40006230-40006527	rs6101805:C:T	0.999	peak195094,peak195095
peak124170	chr20:42628486-42629049	rs35869726:A:C	peak195430	chr20:42628743-42629028	rs35869726:A:C	1	peak195430
peak124214	chr20:43547501-43548067	rs11086881:G:A	peak195523	chr20:43547536-43547809	rs11086881:G:A	1	peak195523
peak124340	chr20:44683218-44684130	rs6031731:A:C	peak195746	chr20:44683458-44683874	rs6031731:A:C	1	peak195746
peak124524	chr20:46607828-46608649	rs6124830:T:C	peak196049	chr20:46607964-46608607	rs6124828:T:A	0.998	peak196049
peak124558	chr20:46823098-46824110	rs56175083:A:G	peak196096	chr20:46823166-46823971	rs73299948:C:T	0.98	peak196096
peak124564	chr20:46965067-46965991	rs4809607:G:A	peak196112	chr20:46965437-46965905	rs4809607:G:A	1	peak196112
peak124568	chr20:47032866-47033663	rs4810591:A:G	peak196121	chr20:47032927-47033628	rs6066173:T:C	0.999	peak196121
peak1246	chr1:11748583-11749752	rs11121820:T:G	peak2471	chr1:11749102-11749520	rs11121820:T:G	1	peak2471
peak124779	chr20:48877338-48877715	rs13045854:A:C	peak196481	chr20:48877363-48877663	rs13037473:T:C	1	peak196481
peak124846	chr20:49475269-49476263	rs477135:T:A	peak196589	chr20:49475299-49475785	rs477135:T:A	1	peak196590,peak196589
peak124871	chr20:49603186-49603735	rs6125685:G:A	peak196621	chr20:49603233-49603707	rs6019930:T:G	0.981	peak196621
peak124875	chr20:49614309-49614755	rs235017:G:A	peak196625	chr20:49614411-49614648	rs402109:T:C	0.979	peak196625
peak124898	chr20:49702577-49703247	rs6012716:G:T	peak196660	chr20:49702948-49703219	rs6012717:G:T	0.997	peak196660
peak124937	chr20:49915059-49917545	rs112572132:G:C	peak196713	chr20:49916945-49917293	rs3761175:G:C	0.999	peak196713
peak125050	chr20:50440225-50441506	rs6063515:G:A	peak196876	chr20:50440471-50441219	rs6063516:G:A	0.999	peak196876
peak125158	chr20:51326226-51326595	rs4809833:A:T	peak197049	chr20:51326274-51326538	rs4809833:A:T	1	peak197049
peak125175	chr20:51427009-51427866	rs6126227:A:G	peak197078	chr20:51427168-51427728	rs6126227:A:G	1	peak197078
peak125382	chr20:53739969-53740658	rs6068643:C:G	peak197375	chr20:53740382-53740597	rs6068643:C:G	1	peak197375
peak125395	chr20:53819913-53820628	rs6022779:T:C	peak197391	chr20:53819925-53820344	rs6022779:T:C	1	peak197391
peak125432	chr20:54067219-54068166	rs34522098:A:C	peak197436	chr20:54067494-54068134	rs73134888:A:G	0.998	peak197436
peak125563	chr20:57126450-57127025	rs4811814:A:C	peak197660	chr20:57126471-57126954	rs4811814:A:C	1	peak197660
peak125595	chr20:57457093-57457958	rs6015004:C:T	peak197731	chr20:57457207-57457755	rs1000698:C:T	0.987	peak197731
peak125612	chr20:57547098-57547768	rs4811874:G:C	peak197754	chr20:57547325-57547698	rs4811874:G:C	1	peak197754
peak125613	chr20:57548028-57548765	rs4811876:G:A	peak197755	chr20:57548200-57548545	rs4811879:A:C	0.999	peak197755
peak125817	chr20:60087593-60088231	rs116261101:T:C	peak198214	chr20:60087903-60088265	rs116261101:T:C	1	peak198214
peak125936	chr20:62285538-62286735	rs2297592:A:G	peak198682	chr20:62285608-62286203	rs4925368:C:T	0.998	peak198682,peak198683
peak125955	chr20:62370085-62371364	rs6061230:A:T	peak198718	chr20:62370077-62370331	rs6061230:A:T	1	peak198718,peak198719,peak198720
peak126085	chr20:63246862-63247348	rs2236191:A:G	peak198987	chr20:63246927-63247221	rs2236191:A:G	1	peak198987
peak126095	chr20:63363051-63364507	rs3810471:C:T	peak199020	chr20:63363124-63363484	rs3810471:C:T	1	peak199020,peak199021
peak126178	chr20:63948482-63949927	rs817310:C:G	peak199194	chr20:63948866-63949658	rs817310:C:G	1	peak199194
peak126202	chr20:64064143-64064732	rs6062342:C:A	peak199230	chr20:64064406-64064722	rs6062342:C:A	1	peak199230
peak12647	chr1:164806479-164807441	rs16835123:C:T	peak19421	chr1:164807206-164807451	rs16835123:C:T	1	peak19421,peak19420
peak126552	chr21:14273633-14274477	rs2822521:G:A	peak199686	chr21:14273683-14274441	rs2822520:A:G	0.956	peak199686
peak126683	chr21:15559523-15560139	rs6517486:A:T	peak199855	chr21:15559668-15560101	rs6517486:A:T	1	peak199855
peak12685	chr1:165277426-165277773	rs4657431:C:T	peak19485	chr1:165277365-165277740	rs4657431:C:T	1	peak19485
peak127003	chr21:21751340-21751653	rs73223691:A:G	peak200310	chr21:21751362-21751646	rs73223691:A:G	1	peak200310
peak12702	chr1:165424051-165425272	rs3753896:G:T	peak19506	chr1:165424403-165425248	rs3753896:G:T	1	peak19506
peak127032	chr21:22311422-22312824	rs2827390:C:A	peak200360	chr21:22311686-22312289	rs2827390:C:A	1	peak200360
peak12710	chr1:165530644-165531711	rs1425754:G:C	peak19518	chr1:165531009-165531379	rs1425754:G:C	1	peak19518
peak12733	chr1:165726216-165726560	rs1913845:C:T	peak19555	chr1:165726279-165726548	rs1913845:C:T	1	peak19555
peak127677	chr21:31982994-31984197	rs737103:G:A	peak201280	chr21:31983119-31983839	rs737103:G:A	1	peak201280,peak201281
peak127773	chr21:33127126-33127780	rs2834092:C:T	peak201439	chr21:33127171-33127653	rs2834092:C:T	1	peak201439
peak127796	chr21:33290370-33290851	rs2834174:A:G	peak201467	chr21:33290392-33290821	rs2409484:T:C	0.88	peak201467
peak127946	chr21:34520793-34522677	rs6517237:T:C	peak201678	chr21:34521158-34522124	rs1012598:A:T	0.999	peak201678
peak127965	chr21:34688202-34688507	rs2834579:G:A	peak201712	chr21:34688235-34688552	rs2236610:C:G	0.816	peak201712
peak128107	chr21:36199955-36200537	rs7282770:T:G	peak201934	chr21:36199992-36200499	rs7282770:T:G	1	peak201934
peak128108	chr21:36200631-36201278	rs7282770:T:G	peak201935	chr21:36200581-36200903	rs7282770:T:G	1	peak201935
peak128187	chr21:37071927-37074387	rs2298684:G:A	peak202090	chr21:37072467-37074327	rs2298683:T:C	0.995	peak202090
peak128253	chr21:37827909-37830038	rs2835997:A:G	peak202200	chr21:37827955-37828248	rs9941832:A:G	0.991	peak202200,peak202201
peak128336	chr21:38794007-38794672	rs1209939:G:A	peak202331	chr21:38794072-38794590	rs1209940:T:G	0.992	peak202331
peak128337	chr21:38794743-38795811	rs1209938:A:G	peak202332	chr21:38794927-38795482	rs1209940:T:G	0.991	peak202332,peak202333
peak128347	chr21:38834753-38835037	rs2836697:C:T	peak202347	chr21:38834769-38835037	rs877372:T:C	0.976	peak202347
peak128367	chr21:38918499-38919423	rs2836754:T:C	peak202377	chr21:38918704-38919187	rs2836751:C:T	0.999	peak202377
peak128410	chr21:39136849-39138583	rs2836917:A:C	peak202446	chr21:39137150-39137567	rs56113957:C:A	0.99	peak202446
peak128421	chr21:39343044-39343696	rs2735309:C:T	peak202465	chr21:39343237-39343519	rs12482979:C:T	0.999	peak202465
peak128431	chr21:39451385-39452348	rs11575939:C:G	peak202477	chr21:39451560-39452115	rs11575939:C:G	1	peak202477
peak128621	chr21:42018923-42019988	rs220207:A:G	peak202882	chr21:42019128-42019733	rs220207:A:G	1	peak202882
peak128638	chr21:42107385-42108454	rs9980065:G:A	peak202913	chr21:42107511-42108315	rs9980065:G:A	1	peak202913
peak128678	chr21:42381404-42381747	rs225430:C:A	peak202994	chr21:42381432-42381716	rs225430:C:A	1	peak202994
peak128707	chr21:42535475-42536169	rs228057:T:C	peak203038	chr21:42535612-42536155	rs228057:T:C	1	peak203038
peak128708	chr21:42539299-42540746	rs62215926:C:T	peak203040	chr21:42539962-42540308	rs62215926:C:T	1	peak203040
peak128751	chr21:42836872-42838765	rs6586248:C:T	peak203131	chr21:42837450-42838578	rs6586248:C:T	1	peak203131
peak128764	chr21:42948709-42949896	rs2401141:G:T	peak203158	chr21:42949292-42949761	rs2401141:G:T	1	peak203158
peak129042	chr21:44791287-44791970	rs235267:T:C	peak203561	chr21:44791306-44791772	rs235268:A:C	0.897	peak203561
peak129139	chr21:45308495-45310109	rs9789865:A:G	peak203733	chr21:45308507-45309367	rs9789865:A:G	1	peak203733
peak129142	chr21:45329378-45330851	rs914237:G:A	peak203738	chr21:45329464-45330740	rs914237:G:A	1	peak203738
peak129188	chr21:45555421-45556429	rs3827266:C:T	peak203834	chr21:45555475-45556397	rs9983073:G:C	0.961	peak203834
peak129271	chr21:46294752-46296903	rs11700398:G:A	peak204044	chr21:46296192-46296733	rs11700398:G:A	1	peak204044
peak129293	chr21:46540299-46540761	rs9306156:T:C	peak204104	chr21:46540379-46540705	rs9306156:T:C	1	peak204104
peak129479	chr22:17837235-17837727	rs2587107:C:A	peak204492	chr22:17837297-17837651	rs2587106:A:G	1	peak204492
peak129506	chr22:17954250-17955047	rs12158906:A:G	peak204530	chr22:17954468-17954818	rs12158906:A:G	1	peak204530
peak129637	chr22:19586853-19587512	rs5993701:C:T	peak204742	chr22:19586870-19587348	rs5746792:C:T	0.999	peak204742
peak129687	chr22:19935750-19936552	rs5748486:C:G	peak204834	chr22:19935827-19936387	rs6518589:T:C	0.852	peak204834
peak129718	chr22:20104618-20105075	rs2904565:C:T	peak204886	chr22:20104756-20105022	rs8139591:A:G	1	peak204886
peak129731	chr22:20186995-20187604	rs75765:C:T	peak204915	chr22:20187076-20187591	rs75766:C:A	1	peak204915
peak129732	chr22:20193408-20193712	rs701444:G:A	peak204917	chr22:20193440-20193702	rs696885:G:T	0.986	peak204917
peak129812	chr22:20763544-20764372	rs4822496:A:G	peak205057	chr22:20763609-20763986	rs4820591:G:C	0.999	peak205057,peak205058
peak12985	chr1:168266189-168267551	rs10800347:A:G	peak19908	chr1:168266465-168267312	rs10800347:A:G	1	peak19908
peak129934	chr22:21961253-21962681	rs17759934:C:T	peak205249	chr22:21961559-21962464	rs62234971:C:T	0.999	peak205249
peak130085	chr22:23283335-23284604	rs13054277:G:A	peak205551	chr22:23284183-23284474	rs11704598:A:G	1	peak205551
peak130132	chr22:23828645-23829453	rs2186369:T:G	peak205649	chr22:23828680-23829277	rs2186369:T:G	1	peak205649
peak130152	chr22:23969164-23972213	rs4822466:G:A	peak205681	chr22:23969206-23972142	rs4822466:G:A	1	peak205681
peak130166	chr22:24067571-24068622	rs6004052:C:T	peak205698	chr22:24067600-24068465	rs6004052:C:T	1	peak205698
peak1305	chr1:12157515-12158247	rs1148459:T:G	peak2577	chr1:12157692-12158216	rs1148459:T:G	1	peak2577
peak130514	chr22:27475880-27476968	rs13053864:C:T	peak206279	chr22:27476309-27476636	rs13053864:C:T	1	peak206279,peak206280
peak130668	chr22:29081606-29082790	rs134613:T:G	peak206548	chr22:29081834-29082238	rs134619:C:T	0.998	peak206548
peak131087	chr22:32628561-32629653	rs2051569:C:A	peak207195	chr22:32628748-32629605	rs2157168:A:G	0.999	peak207195
peak131134	chr22:33034455-33035168	rs9609686:G:A	peak207266	chr22:33034742-33035140	rs12484058:A:G	0.999	peak207266
peak131281	chr22:35535786-35536754	rs3940180:T:C	peak207490	chr22:35535854-35536545	rs3940180:T:C	1	peak207490
peak131359	chr22:36194570-36195370	rs132704:T:C	peak207622	chr22:36194993-36195287	rs132703:C:T	0.985	peak207622
peak13136	chr1:169545717-169546759	rs6672595:C:T	peak20088	chr1:169545992-169546740	rs6672595:C:T	1	peak20088
peak132005	chr22:40803156-40803559	rs138309:C:A	peak208662	chr22:40803289-40803527	rs138310:T:C	0.986	peak208662
peak132043	chr22:41231226-41231767	rs3721:C:T	peak208712	chr22:41231398-41231700	rs139484:T:G	0.994	peak208712
peak132164	chr22:42118825-42120994	rs5751221:C:T	peak208895	chr22:42119396-42120040	rs5751221:C:T	1	peak208895
peak132279	chr22:42874449-42875201	rs2092664:A:C	peak209076	chr22:42874648-42875008	chr22:42875152:CT:C:CT:C	0.996	peak209076
peak132291	chr22:42920105-42920472	rs1807567:A:T	peak209093	chr22:42920152-42920383	rs8135830:G:A	0.901	peak209093
peak132292	chr22:42922446-42923181	rs2092211:G:T	peak209095	chr22:42922471-42923083	rs2092211:G:T	1	peak209095
peak132393	chr22:43637213-43637853	rs137734:G:A	peak209287	chr22:43637222-43637809	rs137736:C:T	0.998	peak209287
peak13240	chr1:171191847-171192416	rs12092242:T:C	peak20243	chr1:171192051-171192348	rs12567600:C:T	0.999	peak20243
peak132433	chr22:44023632-44024967	rs112385337:A:G	peak209354	chr22:44023723-44024923	rs7285340:T:C	0.986	peak209354
peak132467	chr22:44382562-44384202	rs2071816:G:A	peak209450	chr22:44382649-44383118	rs2071816:G:A	1	peak209450,peak209451
peak132502	chr22:44712149-44712547	rs16992630:T:C	peak209536	chr22:44712219-44712492	rs16992630:T:C	1	peak209536
peak13251	chr1:171251039-171252035	rs12090485:A:T	peak20258	chr1:171251258-171252008	rs12090485:A:T	1	peak20258
peak132528	chr22:45101790-45102315	rs7284581:T:C	peak209634	chr22:45101892-45102211	rs7284581:T:C	1	peak209634
peak132564	chr22:45328436-45329991	rs2350628:G:A	peak209694	chr22:45328783-45329961	rs6007592:G:A	0.999	peak209694
peak132678	chr22:46240515-46241293	rs41329344:C:T	peak209900	chr22:46240898-46241244	rs41355347:G:A	1	peak209900
peak13268	chr1:171372326-171373123	rs7516677:A:G	peak20280	chr1:171372518-171372996	rs11807475:A:G	0.949	peak20280
peak13274	chr1:171434307-171435558	rs10912992:C:T	peak20289	chr1:171434732-171435372	rs12031933:C:T	0.993	peak20289
peak132851	chr22:47918330-47918884	rs5768156:G:A	peak210336	chr22:47918484-47918837	rs5768156:G:A	1	peak210336
peak132895	chr22:48624182-48625128	rs4925426:C:T	peak210516	chr22:48624327-48624820	rs4925424:G:A	0.991	peak210516
peak132971	chr22:49664583-49665249	rs73179148:G:A	peak210812	chr22:49664861-49665202	rs73179148:G:A	1	peak210812
peak133002	chr22:49933186-49933698	rs28453960:C:T	peak210891	chr22:49933258-49933603	rs375721073:TG:T	0.982	peak210891
peak133003	chr22:49934111-49934516	rs28649194:G:C	peak210892	chr22:49934154-49934480	rs28622317:T:G	0.978	peak210892
peak133007	chr22:49944292-49944938	rs28538803:A:G	peak210896	chr22:49944288-49944832	rs28538803:A:G	1	peak210896
peak133009	chr22:49948816-49949679	rs117800401:T:G	peak210898	chr22:49948907-49949624	rs73181189:T:C	0.934	peak210898
peak133221	chr3:1692429-1693506	rs4684287:C:G	peak211239	chr3:1693174-1693492	rs11714214:A:G	0.997	peak211239
peak133271	chr3:2908745-2909542	rs11129338:A:G	peak211312	chr3:2908793-2909345	rs11129338:A:G	1	peak211312
peak133272	chr3:2915714-2916424	rs73114653:G:T	peak211313	chr3:2915790-2916337	rs73114653:G:T	1	peak211313
peak133317	chr3:3782322-3782883	rs769639:C:G	peak211389	chr3:3782503-3782816	rs769639:C:G	1	peak211389
peak133332	chr3:4079106-4080454	rs2686714:T:C	peak211411	chr3:4079384-4080164	rs2686714:T:C	1	peak211411
peak133334	chr3:4138155-4138808	rs2675207:C:G	peak211414	chr3:4138253-4138755	rs7611166:C:G	0.996	peak211414
peak133337	chr3:4174398-4175442	rs9883838:G:A	peak211419	chr3:4174679-4175239	rs9883838:G:A	1	peak211419
peak133338	chr3:4196315-4197271	rs2587931:T:C	peak211420	chr3:4196458-4197191	rs1485250:G:A	0.999	peak211420
peak133384	chr3:4614053-4615295	rs11707535:T:C	peak211480	chr3:4614099-4614519	rs11709423:G:A	0.998	peak211480
peak13342	chr1:172469734-172470547	rs2213738:C:T	peak20376	chr1:172470170-172470524	rs2213738:C:T	1	peak20375,peak20376
peak133774	chr3:10008660-10009348	rs9837460:G:C	peak212118	chr3:10008977-10009329	rs28667821:A:G	1	peak212118
peak133810	chr3:10286692-10287267	rs35682:G:A	peak212168	chr3:10286900-10287191	rs35682:G:A	1	peak212168
peak133878	chr3:10738665-10739414	rs1682828:T:C	peak212307	chr3:10738707-10739218	rs171239:T:C	0.966	peak212307
peak133888	chr3:10855390-10856250	rs13079153:A:G	peak212328	chr3:10855487-10855901	rs13079153:A:G	1	peak212328
peak13392	chr1:173024562-173024929	rs1076685:A:T	peak20441	chr1:173024580-173024923	rs1076685:A:T	1	peak20441
peak134073	chr3:12616927-12617171	rs5746194:G:A	peak212599	chr3:12616937-12617178	rs5746194:G:A	1	peak212599
peak134097	chr3:12787387-12787943	rs9877165:C:T	peak212634	chr3:12787406-12787797	rs9881832:C:T	0.816	peak212634
peak134184	chr3:13261081-13261460	rs7633375:G:C	peak212784	chr3:13261112-13261418	rs7633375:G:C	1	peak212784
peak134187	chr3:13263530-13264636	rs581086:C:T	peak212787	chr3:13263708-13264478	rs581086:C:T	1	peak212787
peak134220	chr3:13496116-13496846	rs2290193:A:C	peak212854	chr3:13496301-13496671	rs2290193:A:C	1	peak212854
peak134270	chr3:14141289-14142178	rs1043943:T:C	peak212972	chr3:14141413-14142061	rs1043943:T:C	1	peak212972
peak134277	chr3:14216120-14217113	rs9869943:T:C	peak212983	chr3:14216216-14216915	rs9846167:C:A	0.996	peak212983
peak134347	chr3:14724758-14725502	rs4685212:C:T	peak213115	chr3:14724898-14725420	rs4685212:C:T	1	peak213115
peak13437	chr1:173523340-173523849	rs4916367:A:G	peak20501	chr1:173523365-173523715	rs10753082:C:T	1	peak20501
peak134515	chr3:16059981-16061325	rs1454768:T:C	peak213368	chr3:16060252-16060809	rs17041839:C:T	0.81	peak213368
peak134682	chr3:17255802-17256362	rs6802891:T:C	peak213619	chr3:17255814-17256275	rs2470586:C:T	0.972	peak213619
peak134699	chr3:17478575-17479366	rs9823064:A:G	peak213639	chr3:17478621-17479056	rs9823064:A:G	1	peak213639
peak134731	chr3:17947684-17948357	rs4128378:T:C	peak213681	chr3:17947794-17948229	rs4128378:T:C	1	peak213681
peak134760	chr3:18593302-18593597	rs400750:T:G	peak213725	chr3:18593333-18593549	rs453585:G:A	0.999	peak213725
peak134867	chr3:20108568-20109528	rs77590524:A:G	peak213859	chr3:20108658-20109381	rs6783606:G:A	0.973	peak213859
peak134874	chr3:20230419-20231406	rs4858164:C:G	peak213869	chr3:20230443-20230762	rs4858164:C:G	1	peak213869,peak213870
peak134930	chr3:21644874-21645952	rs13080106:A:G	peak213975	chr3:21645068-21645910	rs13080106:A:G	1	peak213975
peak134946	chr3:21954683-21955049	rs58842146:C:G	peak213998	chr3:21954732-21955040	rs58842146:C:G	1	peak213998
peak134947	chr3:21955152-21956174	rs58842146:C:G	peak213999	chr3:21955223-21955834	rs58842146:C:G	1	peak213999
peak135245	chr3:25367072-25367426	rs17588729:A:G	peak214419	chr3:25367085-25367384	rs17588729:A:G	1	peak214419
peak135376	chr3:27424760-27426864	rs34307140:A:C	peak214618	chr3:27426006-27426519	rs34307140:A:C	1	peak214617,peak214618,peak214619
peak135377	chr3:27431108-27431775	rs3755652:C:T	peak214620	chr3:27431149-27431499	rs13077400:A:G	0.999	peak214620
peak135400	chr3:27581273-27582455	rs2642946:A:T	peak214643	chr3:27581844-27582264	rs2642946:A:T	1	peak214643
peak135463	chr3:28679700-28680573	rs4680704:A:G	peak214728	chr3:28679961-28680453	rs4680704:A:G	1	peak214728
peak135478	chr3:28952290-28953135	rs9854864:G:A	peak214749	chr3:28952709-28952987	rs9854864:G:A	1	peak214749
peak135624	chr3:30648346-30649242	rs891594:C:A	peak214928	chr3:30648478-30649008	rs891594:C:A	1	peak214928
peak135728	chr3:31802914-31803501	rs73059403:C:T	peak215065	chr3:31803023-31803390	rs73059403:C:T	1	peak215065
peak136385	chr3:39290327-39290656	rs2853705:A:C	peak216101	chr3:39290401-39290654	rs2853705:A:C	1	peak216101
peak136409	chr3:39548266-39548840	rs11129837:A:G	peak216136	chr3:39548331-39548639	rs11129837:A:G	1	peak216136
peak136714	chr3:43074351-43075713	rs1566422:T:C	peak216592	chr3:43074496-43075089	rs1566422:T:C	1	peak216592,peak216593
peak136874	chr3:45210381-45210991	rs28295:G:A	peak216848	chr3:45210407-45210932	rs28295:G:A	1	peak216848
peak136878	chr3:45337088-45337408	rs13096839:C:T	peak216858	chr3:45337107-45337393	rs13096839:C:T	1	peak216858
peak136915	chr3:45620486-45620810	rs6808958:T:C	peak216910	chr3:45620515-45620786	rs6808958:T:C	1	peak216910
peak137036	chr3:46442656-46442927	rs6441992:C:A	peak217066	chr3:46442666-46442918	rs6441990:C:G	0.997	peak217066
peak137068	chr3:46660609-46661308	rs877680:A:G	peak217118	chr3:46660615-46661243	rs877680:A:G	1	peak217118
peak137430	chr3:50171353-50172183	rs3774751:G:T	peak217673	chr3:50171552-50172035	rs3774751:G:T	1	peak217673
peak137650	chr3:52237505-52239742	rs7628461:A:C	peak217997	chr3:52237528-52238104	rs7628461:A:C	1	peak217997
peak13768	chr1:178551035-178553185	rs17276527:G:A	peak21014	chr1:178551268-178551662	rs17361251:C:A	1	peak21014,peak21015,peak21016
peak137889	chr3:54138951-54139497	rs35822278:C:G	peak218371	chr3:54138960-54139361	rs35822278:C:G	1	peak218371
peak137895	chr3:54299165-54299608	rs56348221:A:G	peak218385	chr3:54299207-54299501	rs59804657:C:T	0.986	peak218385
peak13791	chr1:178692547-178692947	rs35887731:T:C	peak21048	chr1:178692650-178692884	rs35887731:T:C	1	peak21048
peak138033	chr3:56983356-56983986	rs9854127:G:A	peak218636	chr3:56983520-56983843	rs9854127:G:A	1	peak218636
peak138164	chr3:58230957-58231556	rs6802482:G:A	peak218807	chr3:58231170-58231505	rs12637567:T:C	0.997	peak218807
peak138201	chr3:58418185-58418590	rs68021431:A:G	peak218858	chr3:58418251-58418518	rs68021431:A:G	1	peak218858
peak138239	chr3:58623583-58624295	rs12629222:C:T	peak218905	chr3:58624007-58624279	rs2886050:C:T	0.989	peak218904,peak218905
peak138249	chr3:58668272-58668647	rs10461038:A:G	peak218920	chr3:58668311-58668586	rs55911709:C:T	0.985	peak218920
peak138302	chr3:59759143-59760093	rs993000:C:T	peak218992	chr3:59759399-59759796	rs1349021:G:T	0.995	peak218992
peak138327	chr3:60126749-60127328	rs55659703:A:G	peak219019	chr3:60126963-60127268	rs55659703:A:G	1	peak219019
peak138332	chr3:60303155-60303986	rs9867642:G:A	peak219024	chr3:60303226-60303743	rs9829607:A:G	0.982	peak219024
peak138413	chr3:61552469-61553138	rs56172395:G:C	peak219127	chr3:61552716-61553095	rs56172395:G:C	1	peak219127
peak138705	chr3:65605853-65606952	rs6762205:T:G	peak219563	chr3:65606024-65606721	rs6762205:T:G	1	peak219563
peak13871	chr1:179440892-179441361	rs6693627:C:T	peak21156	chr1:179440890-179441284	rs6693627:C:T	1	peak21156
peak138730	chr3:65831709-65832302	rs4688606:T:A	peak219593	chr3:65831782-65832280	rs4688606:T:A	1	peak219593
peak138899	chr3:67401838-67403267	rs4279119:G:A	peak219827	chr3:67401857-67402398	rs4279119:G:A	1	peak219827,peak219828
peak139187	chr3:71152496-71153725	rs11923661:A:C	peak220211	chr3:71152610-71153345	rs11923661:A:C	1	peak220211
peak139191	chr3:71186679-71187214	rs12496895:C:T	peak220215	chr3:71186833-71187189	rs12496895:C:T	1	peak220215
peak139255	chr3:71610920-71611639	rs1696286:T:C	peak220297	chr3:71611065-71611505	rs1696286:T:C	1	peak220297
peak139267	chr3:71708562-71709107	rs6804667:A:C	peak220312	chr3:71708766-71709057	rs6804667:A:C	1	peak220312
peak139298	chr3:71983780-71984034	rs17009230:G:C	peak220348	chr3:71983770-71984038	rs17009230:G:C	1	peak220348
peak139325	chr3:72127275-72127560	rs1316386:T:A	peak220384	chr3:72127286-72127549	rs1316386:T:A	1	peak220384
peak139378	chr3:72347728-72348398	rs9809116:A:G	peak220452	chr3:72347838-72348342	rs9809116:A:G	1	peak220452
peak139543	chr3:74112510-74113625	rs78654437:C:T	peak220700	chr3:74112757-74113401	rs78654437:C:T	1	peak220700
peak139912	chr3:81684139-81685556	rs1972976:G:A	peak221249	chr3:81684742-81685321	rs3772899:C:G	0.996	peak221249
peak140017	chr3:84547854-84549080	rs11127851:G:C	peak221410	chr3:84547901-84549056	rs6781669:G:A	0.999	peak221410
peak140028	chr3:84885036-84886072	rs694795:T:A	peak221426	chr3:84885061-84885916	rs1248809:A:G	1	peak221426
peak140052	chr3:85504141-85505567	rs1449391:G:T	peak221455	chr3:85504331-85505271	rs12495758:G:A	0.881	peak221455
peak140268	chr3:94414424-94414934	rs9845569:C:T	peak221801	chr3:94414544-94414830	rs9845569:C:T	1	peak221801
peak140339	chr3:96300543-96301739	rs9863025:A:C	peak221915	chr3:96300612-96301127	rs13087890:T:C	0.998	peak221915,peak221916
peak140369	chr3:97018573-97019099	rs2612284:A:G	peak221974	chr3:97018755-97019059	rs2612284:A:G	1	peak221974
peak140485	chr3:98782918-98783494	rs73136038:C:T	peak222132	chr3:98783039-98783479	rs73136038:C:T	1	peak222132
peak140516	chr3:99250407-99251482	rs13100122:G:T	peak222183	chr3:99250404-99250684	rs1402270:C:T	0.996	peak222183
peak140709	chr3:101077665-101078173	rs2317340:G:C	peak222442	chr3:101077712-101078027	rs7636928:A:G	0.996	peak222442
peak140725	chr3:101466643-101467668	rs4683916:C:T	peak222464	chr3:101466783-101467574	rs4683916:C:T	1	peak222464
peak140814	chr3:102235725-102236258	rs67733349:T:A	peak222584	chr3:102235726-102236052	rs67733349:T:A	1	peak222584
peak140888	chr3:104126508-104127730	rs2398933:G:T	peak222696	chr3:104126533-104127490	rs13077592:G:A	0.998	peak222696
peak140889	chr3:104127826-104128257	rs28378717:A:G	peak222697	chr3:104127862-104128240	rs2398934:C:T	1	peak222697
peak140928	chr3:104696138-104696770	rs62258424:G:C	peak222748	chr3:104696177-104696693	rs62258424:G:C	1	peak222748
peak140940	chr3:105011585-105011889	rs9288796:G:A	peak222764	chr3:105011609-105011880	rs9288796:G:A	1	peak222764
peak140959	chr3:105406275-105406610	rs10933816:A:G	peak222788	chr3:105406323-105406595	rs6437587:C:T	0.996	peak222788
peak140979	chr3:105518106-105519194	rs6776462:G:C	peak222809	chr3:105518298-105518525	rs6776188:C:T	1	peak222809
peak141	chr1:1543252-1544218	rs7533:A:G	peak214	chr1:1543335-1544165	rs3766179:C:G	0.996	peak214
peak141027	chr3:105882365-105883314	rs71627856:A:T	peak222870	chr3:105882398-105883133	rs4894962:G:A	0.879	peak222870
peak141144	chr3:107641694-107642316	rs638702:C:T	peak223046	chr3:107641955-107642276	rs638702:C:T	1	peak223046
peak141146	chr3:107650777-107651215	rs614409:C:T	peak223048	chr3:107650870-107651132	rs614409:C:T	1	peak223048
peak141221	chr3:108406425-108407456	rs936266:C:T	peak223149	chr3:108406609-108407229	rs936266:C:T	1	peak223149
peak141286	chr3:109154945-109155382	rs4638978:C:T	peak223236	chr3:109155004-109155321	rs4638978:C:T	1	peak223236
peak141294	chr3:109254157-109255338	rs67542217:G:A	peak223252	chr3:109254761-109255157	rs4855705:T:C	0.971	peak223252
peak141351	chr3:110382022-110382466	rs1512680:G:T	peak223342	chr3:110382049-110382403	rs1512680:G:T	1	peak223342
peak141446	chr3:111712222-111712778	rs4502554:C:T	peak223486	chr3:111712309-111712707	rs4502554:C:T	1	peak223486
peak141454	chr3:111737332-111738116	rs56028731:T:C	peak223494	chr3:111737530-111738062	rs955381:T:C	1	peak223494
peak141473	chr3:111836984-111837579	rs4583615:A:G	peak223522	chr3:111837167-111837493	rs4383483:C:G	0.999	peak223522
peak141525	chr3:112293188-112294547	rs10934164:T:C	peak223600	chr3:112293353-112294353	rs10934164:T:C	1	peak223600
peak141610	chr3:113054338-113054952	rs12495569:G:A	peak223697	chr3:113054529-113054913	rs12495569:G:A	1	peak223697
peak14170	chr1:183078792-183079558	rs73051776:A:G	peak21615	chr1:183078964-183079417	rs34823124:TAGAC:T	1	peak21615
peak14171	chr1:183079949-183081117	rs79733088:T:C	peak21616	chr1:183080443-183080817	rs79733088:T:C	1	peak21616
peak141986	chr3:118682909-118683414	rs6769257:C:T	peak224245	chr3:118682921-118683341	rs6769257:C:T	1	peak224245
peak14206	chr1:183457438-183458049	rs4652802:A:G	peak21661	chr1:183457525-183457809	rs4652802:A:G	1	peak21661
peak14237	chr1:183697897-183698425	rs4507976:G:A	peak21703	chr1:183698053-183698388	rs6701811:G:A	0.892	peak21703
peak142507	chr3:123918761-123919894	rs2682253:T:C	peak225063	chr3:123919136-123919807	rs2682251:G:A	0.991	peak225063
peak142565	chr3:124520713-124521634	rs6781886:A:C	peak225158	chr3:124520972-124521441	rs6781886:A:C	1	peak225158
peak142607	chr3:124768826-124769160	rs6768588:A:G	peak225215	chr3:124768887-124769151	rs2291082:A:G	0.999	peak225215
peak142685	chr3:125200750-125201477	rs4679370:T:C	peak225324	chr3:125200787-125201283	rs4679370:T:C	1	peak225324
peak142687	chr3:125206859-125208512	rs11710930:A:T	peak225327	chr3:125207438-125207878	rs9833435:A:G	0.998	peak225326,peak225327
peak142711	chr3:125482283-125482837	rs9864395:T:G	peak225357	chr3:125482356-125482758	rs9864395:T:G	1	peak225357
peak142748	chr3:125990189-125991045	rs12636296:G:T	peak225412	chr3:125990205-125990997	rs12636296:G:T	1	peak225412
peak142836	chr3:126537049-126538379	rs6783962:T:G	peak225586	chr3:126538156-126538378	rs1873394:C:T	0.994	peak225585,peak225586
peak143072	chr3:128653677-128654192	rs4481171:C:T	peak226092	chr3:128653667-128653930	rs4481172:C:A	0.998	peak226092
peak143180	chr3:129343665-129344403	rs6788975:A:T	peak226255	chr3:129343728-129344306	rs6764649:G:A	0.997	peak226255
peak143321	chr3:130627057-130627784	rs9823913:A:G	peak226455	chr3:130627169-130627457	rs9823913:A:G	1	peak226455
peak143322	chr3:130635045-130635637	rs9849240:T:C	peak226456	chr3:130635323-130635630	rs11269759:GGAGGTTATCTCTT:G	0.999	peak226456
peak14340	chr1:184632470-184634320	rs10911622:C:T	peak21849	chr1:184632758-184633258	rs10911622:C:T	1	peak21849,peak21850
peak143527	chr3:133821778-133822527	rs6439443:T:C	peak226763	chr3:133821823-133822426	rs6439443:T:C	1	peak226763
peak143553	chr3:134060832-134061304	rs75111872:G:A	peak226828	chr3:134060896-134061229	rs75111872:G:A	1	peak226828
peak143736	chr3:136212820-136214053	rs687339:C:T	peak227183	chr3:136213072-136213733	rs687339:C:T	1	peak227183
peak143738	chr3:136235430-136236184	rs1153871:T:C	peak227185	chr3:136235515-136235942	rs1153871:T:C	1	peak227185
peak143781	chr3:136867600-136868089	rs34799319:G:A	peak227241	chr3:136867651-136867908	rs34799319:G:A	1	peak227241
peak143806	chr3:136957608-136958052	rs835632:A:T	peak227266	chr3:136957704-136958007	rs148967788:CTTCT:C	1	peak227266
peak143817	chr3:137081528-137082054	rs1351892:C:A	peak227285	chr3:137081756-137082054	rs1351892:C:A	1	peak227285
peak144187	chr3:141925736-141925979	rs1050190:G:T	peak227968	chr3:141925753-141926000	rs1050190:G:T	1	peak227968
peak144238	chr3:142588705-142589246	rs9846960:G:A	peak228042	chr3:142588760-142589041	rs9879995:A:C	0.921	peak228042
peak144351	chr3:143600779-143601175	rs1978913:A:G	peak228184	chr3:143600840-143601080	rs11712583:T:C	0.997	peak228184
peak144491	chr3:145807839-145808352	rs6440388:A:G	peak228388	chr3:145807999-145808314	rs7643638:C:T	0.999	peak228388
peak144574	chr3:146646234-146646601	rs6799360:A:G	peak228496	chr3:146646263-146646570	rs6799360:A:G	1	peak228496
peak144622	chr3:147705519-147706209	rs2319306:A:G	peak228568	chr3:147705608-147705967	rs2319306:A:G	1	peak228568
peak144665	chr3:148581893-148582622	rs2639366:A:G	peak228631	chr3:148581991-148582558	rs2639366:A:G	1	peak228631
peak144666	chr3:148585824-148586477	rs7640795:C:T	peak228632	chr3:148586053-148586388	rs11711899:G:A	0.999	peak228632
peak144679	chr3:148712197-148712701	rs7647324:G:A	peak228648	chr3:148712262-148712594	rs3772627:A:G	0.983	peak228648
peak144776	chr3:149386504-149387391	rs9812711:G:C	peak228786	chr3:149386623-149387327	rs9812711:G:C	1	peak228786
peak14482	chr1:186244862-186245224	rs660621:A:G	peak22023	chr1:186244895-186245179	rs662786:T:C	1	peak22023
peak145004	chr3:151300359-151300988	rs1873619:G:A	peak229093	chr3:151300590-151300885	rs1873619:G:A	1	peak229093
peak145039	chr3:151766332-151766839	rs12636169:T:A	peak229140	chr3:151766418-151766790	rs62276063:G:C	1	peak229140
peak145198	chr3:153268549-153270111	rs16822467:G:A	peak229333	chr3:153268607-153269308	rs16822467:G:A	1	peak229333
peak145235	chr3:153837209-153838194	rs1524537:G:A	peak229379	chr3:153837274-153837627	rs1524537:G:A	1	peak229379,peak229380
peak145308	chr3:155124724-155125770	rs6804570:C:T	peak229491	chr3:155124776-155125093	rs6804455:C:G	0.997	peak229491,peak229492
peak145379	chr3:156160463-156161014	rs3936002:A:G	peak229602	chr3:156160701-156160944	rs3936002:A:G	1	peak229602
peak145482	chr3:157093185-157093482	rs62274100:C:G	peak229735	chr3:157093218-157093447	rs62274100:C:G	1	peak229735
peak145610	chr3:159187106-159188280	rs17727250:G:T	peak229932	chr3:159187141-159188115	rs17727250:G:T	1	peak229932
peak145672	chr3:159836837-159837761	rs13088856:T:G	peak230013	chr3:159836957-159837302	rs13088856:T:G	1	peak230013
peak145698	chr3:160002254-160002632	rs4680536:A:G	peak230043	chr3:160002272-160002593	rs4680536:A:G	1	peak230043
peak145754	chr3:160617604-160618021	rs1920650:T:C	peak230131	chr3:160617614-160617987	rs1920650:T:C	1	peak230131
peak145763	chr3:160671284-160671629	rs10936210:G:A	peak230142	chr3:160671328-160671592	rs10936210:G:A	1	peak230142
peak145947	chr3:163582809-163583372	rs1599269:T:C	peak230382	chr3:163582988-163583304	rs10936357:A:G	0.998	peak230382
peak146229	chr3:168574306-168576085	rs4955609:G:A	peak230839	chr3:168575624-168576000	rs4955609:G:A	1	peak230839
peak146474	chr3:171323712-171324593	rs6444979:A:G	peak231165	chr3:171323958-171324426	rs6444979:A:G	1	peak231165
peak146616	chr3:172159919-172160555	rs9839226:G:A	peak231341	chr3:172160023-172160520	rs9839226:G:A	1	peak231341
peak146710	chr3:172691113-172692231	rs71629245:C:G	peak231492	chr3:172691338-172692170	rs71629245:C:G	1	peak231492
peak146846	chr3:175431074-175432215	rs7613835:G:A	peak231702	chr3:175431107-175431800	rs7613835:G:A	1	peak231702
peak146892	chr3:176908834-176909470	rs1488891:A:C	peak231792	chr3:176909088-176909439	rs4522781:C:T	0.999	peak231792
peak146999	chr3:177672292-177673944	rs62283317:T:G	peak231938	chr3:177672480-177672877	rs7651286:T:C	1	peak231938
peak147566	chr3:185316780-185318528	rs6782350:G:A	peak232775	chr3:185316987-185317463	rs9290817:A:G	0.997	peak232775
peak148137	chr3:189602504-189602953	rs17443756:A:G	peak233556	chr3:189602514-189602832	rs17443756:A:G	1	peak233556
peak148151	chr3:189862775-189863652	rs11924151:A:G	peak233578	chr3:189863048-189863428	rs11924151:A:G	1	peak233578
peak148210	chr3:190378297-190378974	rs4687141:T:C	peak233650	chr3:190378479-190378943	rs1946324:A:G	0.999	peak233650
peak148262	chr3:190790342-190790740	rs9873594:C:T	peak233724	chr3:190790406-190790699	rs7637080:T:G	0.998	peak233724
peak148297	chr3:191306943-191307970	rs5021498:G:A	peak233777	chr3:191307355-191307775	rs1542672:A:G	0.999	peak233777
peak148312	chr3:191369625-191370107	rs697905:G:A	peak233795	chr3:191369694-191369929	rs697905:G:A	1	peak233795
peak148428	chr3:193564040-193564353	rs281809:T:C	peak233950	chr3:193564061-193564328	rs281809:T:C	1	peak233950
peak148527	chr3:194191948-194192319	rs143707274:C:T	peak234088	chr3:194191956-194192225	rs139820145:C:T	0.996	peak234088
peak14857	chr1:193753031-193753976	rs6697603:A:G	peak22550	chr1:193753045-193753567	rs35309527:T:C	0.981	peak22550
peak148623	chr3:194870634-194872453	rs9855278:G:A	peak234255	chr3:194871999-194872332	rs9855278:G:A	1	peak234254,peak234255,peak234253
peak148636	chr3:194952893-194953545	rs823009:A:C	peak234268	chr3:194952977-194953333	rs823009:A:C	1	peak234268
peak148763	chr3:195849718-195850033	rs112058931:G:A	peak234448	chr3:195849743-195850004	rs112058931:G:A	1	peak234448
peak148811	chr3:196150478-196150897	rs4927880:T:C	peak234528	chr3:196150516-196150801	rs4927881:G:A	0.999	peak234528
peak148855	chr3:196528328-196529391	rs56264978:G:A	peak234586	chr3:196528582-196529136	rs7625068:C:T	0.98	peak234586
peak148956	chr3:197562504-197562794	rs2116295:A:T	peak234730	chr3:197562521-197562785	rs2116295:A:T	1	peak234730
peak14901	chr1:195044763-195045430	rs10754126:A:T	peak22621	chr1:195045108-195045389	rs10921741:G:A	0.998	peak22621
peak149038	chr4:602527-603024	rs73219276:G:A	peak234842	chr4:602607-602971	rs73219276:G:A	1	peak234842
peak149166	chr4:1511500-1512236	rs35598949:A:G	peak235112	chr4:1511615-1512099	rs6814795:A:C	0.965	peak235112
peak149167	chr4:1512713-1513721	rs4254839:T:G	peak235113	chr4:1512785-1513527	rs4254839:T:G	1	peak235113
peak149175	chr4:1580169-1580933	rs11248099:A:T	peak235141	chr4:1580187-1580877	rs11248099:A:T	1	peak235141
peak149191	chr4:1729641-1730103	rs798762:T:C	peak235189	chr4:1729747-1730070	rs798764:C:T	0.972	peak235189
peak149341	chr4:3041230-3042233	rs2857850:A:C	peak235493	chr4:3041249-3042206	rs2857851:C:G	1	peak235493
peak149653	chr4:6355059-6355734	rs68042636:T:C	peak236195	chr4:6355139-6355486	rs56363480:G:A	0.996	peak236195
peak149689	chr4:6695471-6696892	rs3822263:T:C	peak236287	chr4:6695608-6696504	rs3822263:T:C	1	peak236287
peak149758	chr4:7022156-7022719	rs67602077:A:G	peak236391	chr4:7022184-7022696	rs67602077:A:G	1	peak236391
peak149781	chr4:7159956-7160762	rs3901476:G:A	peak236433	chr4:7160027-7160315	rs3901476:G:A	1	peak236433,peak236434
peak149811	chr4:7336654-7337691	rs35301797:T:C	peak236490	chr4:7336692-7337584	rs9997896:T:C	0.973	peak236490
peak149827	chr4:7462251-7463213	rs10025851:T:C	peak236531	chr4:7462425-7463064	rs7693992:C:T	0.986	peak236531
peak149828	chr4:7463501-7464221	rs7653894:C:T	peak236532	chr4:7463786-7464202	rs7698267:G:A	0.999	peak236532
peak149833	chr4:7505951-7506754	rs57659586:C:G	peak236547	chr4:7506029-7506637	rs57659586:C:G	1	peak236547
peak150068	chr4:9603740-9605087	rs6839486:C:A	peak237010	chr4:9604010-9604480	rs6838885:C:T	0.999	peak237010
peak150069	chr4:9638030-9638605	rs6812634:G:T	peak237013	chr4:9638092-9638503	rs6812634:G:T	1	peak237013
peak150130	chr4:10121025-10122071	rs35523212:A:G	peak237138	chr4:10121616-10122015	rs35523212:A:G	1	peak237138,peak237137
peak150276	chr4:12514515-12516041	rs1825098:G:C	peak237351	chr4:12514866-12515989	rs1825098:G:C	1	peak237351
peak150320	chr4:13164595-13165393	rs72616167:G:C	peak237413	chr4:13164772-13165193	rs72616167:G:C	1	peak237413
peak150363	chr4:13876765-13877714	rs28678588:C:T	peak237494	chr4:13876960-13877465	rs10939520:C:T	0.997	peak237494
peak150398	chr4:14608580-14609803	rs4473649:C:T	peak237547	chr4:14608665-14608977	rs9942233:C:T	0.998	peak237547,peak237548
peak150452	chr4:15130924-15132062	rs1455206:G:C	peak237621	chr4:15131535-15131914	rs1455206:G:C	1	peak237621
peak150864	chr4:22237837-22239064	rs60980377:T:G	peak238280	chr4:22237918-22238711	rs73243022:T:G	0.999	peak238280
peak15091	chr1:197335299-197336260	rs10922198:C:G	peak22868	chr1:197335666-197336077	rs10922198:C:G	1	peak22868
peak150917	chr4:22712237-22714568	rs1963996:A:G	peak238373	chr4:22713913-22714501	rs1963996:A:G	1	peak238373
peak151000	chr4:23863690-23865254	rs10213440:T:C	peak238492	chr4:23864479-23865078	rs10213426:T:C	0.998	peak238492
peak151024	chr4:24055699-24056031	rs10489104:C:T	peak238527	chr4:24055720-24055985	rs584374:T:C	0.969	peak238527
peak151054	chr4:24278660-24279030	rs1877095:T:C	peak238567	chr4:24278735-24279004	rs1877095:T:C	1	peak238567
peak151215	chr4:25922355-25923407	rs2168523:C:T	peak238814	chr4:25922965-25923357	rs2168523:C:T	1	peak238814
peak151232	chr4:26021936-26022898	rs871431:T:G	peak238836	chr4:26022137-26022851	rs871431:T:G	1	peak238836
peak151233	chr4:26024085-26024502	rs1567649:G:A	peak238837	chr4:26024115-26024437	rs1567649:G:A	1	peak238837
peak151333	chr4:27043221-27043991	rs16878720:C:T	peak238974	chr4:27043235-27043906	rs16878720:C:T	1	peak238974
peak151334	chr4:27046684-27047203	rs7676191:C:T	peak238975	chr4:27046707-27047169	rs7676191:C:T	1	peak238975
peak151370	chr4:27791401-27792663	rs12640417:T:G	peak239030	chr4:27791641-27792145	rs12640417:T:G	1	peak239030
peak151495	chr4:31996175-31997588	rs10016376:G:A	peak239226	chr4:31996257-31996929	rs10016376:G:A	1	peak239226,peak239227
peak151620	chr4:35125948-35126805	rs6825481:C:A	peak239409	chr4:35125963-35126618	rs10001135:T:G	0.994	peak239409
peak151750	chr4:37467325-37468398	rs1351302:G:A	peak239586	chr4:37467723-37468263	rs1351302:G:A	1	peak239586
peak151804	chr4:37802032-37802552	rs34274238:T:C	peak239659	chr4:37802074-37802454	rs60192185:G:A	0.992	peak239659
peak151849	chr4:38069085-38069751	rs80335740:C:T	peak239722	chr4:38069266-38069600	rs80335740:C:T	1	peak239722
peak151975	chr4:38930009-38930984	rs7666822:C:A	peak239893	chr4:38930233-38930658	rs7666822:C:A	1	peak239893,peak239894
peak151990	chr4:39024975-39026063	rs2711972:G:C	peak239919	chr4:39025072-39025407	rs2711972:G:C	1	peak239920,peak239919
peak152039	chr4:39450556-39451099	rs2687968:A:C	peak239993	chr4:39450609-39451051	rs2608827:T:G	0.999	peak239993
peak152069	chr4:39642993-39643486	rs7700219:G:C	peak240040	chr4:39643037-39643439	chr4:39644126:TA:T:TA:T	0.996	peak240040
peak152158	chr4:40404109-40405780	rs11731024:A:G	peak240154	chr4:40405260-40405543	rs11731024:A:G	1	peak240154
peak152210	chr4:40607046-40607735	rs6837415:C:T	peak240220	chr4:40607245-40607609	rs6837415:C:T	1	peak240220
peak152318	chr4:41358367-41359335	rs61538223:T:C	peak240360	chr4:41358585-41359025	rs61615433:C:G	1	peak240360
peak152512	chr4:44738679-44738939	rs2029557:C:T	peak240645	chr4:44738689-44738939	rs2029557:C:T	1	peak240645
peak152592	chr4:47010357-47011690	rs3934675:G:A	peak240780	chr4:47010938-47011489	rs3934674:A:G	0.999	peak240780
peak152652	chr4:48031893-48033262	rs56001502:C:T	peak240858	chr4:48032737-48033121	rs56001502:C:T	1	peak240858
peak152675	chr4:48173101-48173920	rs61326763:C:T	peak240880	chr4:48173444-48173895	rs61326763:C:T	1	peak240880
peak152972	chr4:54149314-54149890	rs6811249:G:C	peak241357	chr4:54149437-54149797	rs6811249:G:C	1	peak241357
peak152974	chr4:54176092-54176679	rs6821576:T:C	peak241360	chr4:54176245-54176554	rs6554156:T:C	0.995	peak241360
peak15306	chr1:199753347-199753974	rs2435215:A:G	peak23104	chr1:199753475-199753912	rs2435215:A:G	1	peak23104
peak153160	chr4:56701106-56701452	rs744904:G:A	peak241633	chr4:56701119-56701445	rs2412753:G:T	0.992	peak241633
peak153227	chr4:57633245-57634107	rs62312854:A:G	peak241733	chr4:57633302-57633983	rs1019628:A:G	0.999	peak241733
peak153339	chr4:61540948-61541857	rs867711:C:G	peak241941	chr4:61541540-61541818	rs867711:C:G	1	peak241941
peak153348	chr4:61799517-61800571	rs4493573:G:A	peak241957	chr4:61799856-61800112	rs4493573:G:A	1	peak241957
peak153448	chr4:65013783-65014811	rs1155608:A:G	peak242132	chr4:65013901-65014589	rs1988493:T:G	0.997	peak242132
peak153605	chr4:68748267-68749221	rs4694288:A:C	peak242388	chr4:68748410-68748769	rs4694288:A:C	1	peak242388
peak153701	chr4:69525630-69526268	rs55976904:G:A	peak242522	chr4:69525880-69526179	rs55976904:G:A	1	peak242522
peak153709	chr4:69549063-69549402	rs6850688:T:G	peak242531	chr4:69549064-69549361	rs6850258:T:C	0.999	peak242531
peak153715	chr4:69599714-69600497	rs10023782:A:G	peak242544	chr4:69600067-69600409	rs10023782:A:G	1	peak242544
peak153756	chr4:70182390-70184006	rs777390:C:T	peak242596	chr4:70182568-70183270	rs777390:C:T	1	peak242596,peak242597
peak154049	chr4:73665626-73666284	rs62314280:G:T	peak243006	chr4:73665817-73666263	rs62314280:G:T	1	peak243006
peak154323	chr4:76546248-76548157	rs10020050:C:T	peak243374	chr4:76546276-76546518	rs10020050:C:T	1	peak243374
peak154343	chr4:76691735-76692883	rs67732701:T:C	peak243416	chr4:76691807-76692119	rs67732701:T:C	1	peak243416,peak243417
peak154372	chr4:76867374-76868857	rs4859468:G:A	peak243461	chr4:76867830-76868740	rs6838813:A:T	0.968	peak243461
peak154378	chr4:76942971-76943568	rs2036133:G:C	peak243469	chr4:76943155-76943521	rs2036133:G:C	1	peak243469
peak154742	chr4:81722631-81725458	rs12500101:A:G	peak243985	chr4:81723066-81723411	rs12500101:A:G	1	peak243985
peak154766	chr4:81921639-81922370	rs4693011:T:C	peak244020	chr4:81921711-81922070	rs4693011:T:C	1	peak244020
peak15482	chr1:201184556-201185403	rs831759:C:T	peak23372	chr1:201184822-201185304	rs831760:C:G	0.997	peak23372
peak154830	chr4:82739135-82740034	rs1464954:C:T	peak244111	chr4:82739271-82739725	rs1464953:T:C	0.998	peak244111
peak154926	chr4:83605816-83606378	rs1052473:A:G	peak244227	chr4:83605933-83606290	rs1521531:T:C	0.94	peak244227
peak155038	chr4:85669194-85669574	rs62315287:G:T	peak244378	chr4:85669252-85669515	rs34837792:G:A	1	peak244378
peak155066	chr4:85882337-85883082	rs71603467:G:A	peak244411	chr4:85882391-85883040	rs71603467:G:A	1	peak244411
peak15511	chr1:201456349-201457277	rs11586517:G:T	peak23445	chr1:201456882-201457222	rs11586517:G:T	1	peak23445
peak15515	chr1:201480238-201481032	rs10429904:C:G	peak23450	chr1:201480328-201481015	rs10429904:C:G	1	peak23450
peak155165	chr4:87072508-87072927	rs1841265:G:A	peak244537	chr4:87072547-87072925	rs1841265:G:A	1	peak244537
peak155183	chr4:87201897-87202175	rs62308861:G:A	peak244563	chr4:87201909-87202168	rs62308861:G:A	1	peak244563
peak155206	chr4:87353499-87354677	rs11721653:A:G	peak244593	chr4:87353538-87353824	rs12505515:T:A	0.991	peak244593
peak155258	chr4:87864366-87864687	rs34044378:T:C	peak244660	chr4:87864414-87864674	rs34782958:T:C	0.934	peak244660
peak15536	chr1:201570453-201571577	rs483763:T:C	peak23474	chr1:201570753-201571357	rs79063362:A:C	0.902	peak23474
peak155473	chr4:89992795-89993112	rs993331:A:G	peak244934	chr4:89992841-89993090	rs35763285:T:C	0.998	peak244934
peak155476	chr4:89999466-89999899	rs11940898:T:C	peak244937	chr4:89999542-89999875	rs11097241:C:T	0.919	peak244937
peak15566	chr1:201842351-201842949	rs2820316:C:T	peak23526	chr1:201842467-201842883	rs2820316:C:T	1	peak23526
peak155838	chr4:98226199-98227725	rs4699617:A:G	peak245515	chr4:98226958-98227343	rs4699617:A:G	1	peak245514,peak245515
peak155889	chr4:98862273-98862858	rs2120377:A:G	peak245585	chr4:98862388-98862707	rs4699684:G:A	0.913	peak245585
peak156055	chr4:100631353-100632542	rs6834154:C:G	peak245838	chr4:100631573-100631897	rs6834154:C:G	1	peak245838,peak245839
peak156206	chr4:102631647-102632059	rs1054029:G:A	peak246046	chr4:102631684-102632020	rs1054037:C:T	1	peak246046
peak156207	chr4:102633103-102633637	rs12498722:C:T	peak246047	chr4:102633156-102633494	rs5026476:A:C	0.998	peak246047
peak156324	chr4:104643853-104644163	rs512618:C:A	peak246237	chr4:104643859-104644123	rs512618:C:A	1	peak246237
peak156368	chr4:105174011-105174819	rs72665924:A:C	peak246299	chr4:105174533-105174795	rs72665924:A:C	1	peak246299
peak156406	chr4:105631770-105632509	rs1447093:G:C	peak246353	chr4:105631876-105632312	rs1447093:G:C	1	peak246353
peak156486	chr4:107353923-107354724	rs1502766:T:C	peak246488	chr4:107354338-107354631	rs9999189:C:T	1	peak246488
peak156501	chr4:107692866-107693514	rs62313396:G:A	peak246520	chr4:107693145-107693449	rs17618761:G:A	0.999	peak246520
peak156582	chr4:108571038-108571645	rs12642515:G:A	peak246645	chr4:108571085-108571499	rs12642463:C:T	0.999	peak246645
peak1566	chr1:15715738-15716066	rs12745403:C:T	peak3050	chr1:15715768-15716057	rs12745403:C:T	1	peak3050
peak156733	chr4:110130632-110131343	rs17539673:T:A	peak246859	chr4:110130980-110131315	rs34949240:C:T	0.995	peak246859
peak156747	chr4:110207229-110207819	rs5022521:C:T	peak246880	chr4:110207309-110207569	rs5022521:C:T	1	peak246880
peak156749	chr4:110210097-110211595	rs35318168:T:C	peak246883	chr4:110210411-110211571	rs35318168:T:C	1	peak246883
peak156778	chr4:110503203-110504609	rs6844746:A:G	peak246927	chr4:110503588-110504505	rs6844746:A:G	1	peak246927
peak156946	chr4:113433688-113434589	rs2882987:C:G	peak247161	chr4:113433976-113434542	rs2882987:C:G	1	peak247161
peak156957	chr4:113499184-113499587	rs6843759:C:G	peak247179	chr4:113499219-113499542	rs6843759:C:G	1	peak247179
peak157005	chr4:113849616-113850205	rs6834503:T:C	peak247248	chr4:113849751-113850163	rs6834503:T:C	1	peak247248
peak15722	chr1:203244618-203245230	rs949478:G:C	peak23777	chr1:203244763-203245212	rs6695623:G:A	0.997	peak23777
peak157222	chr4:118729189-118730264	rs34508500:T:C	peak247575	chr4:118729943-118730192	rs6857285:G:C	0.998	peak247575
peak157250	chr4:118850203-118851469	rs1365550:C:T	peak247613	chr4:118850371-118851051	rs1365551:A:C	1	peak247613
peak157263	chr4:118940839-118942885	rs10518317:G:C	peak247630	chr4:118941153-118942162	rs10518317:G:C	1	peak247630,peak247631
peak157288	chr4:119188764-119190050	rs17839089:A:G	peak247676	chr4:119189712-119189964	rs17839089:A:G	1	peak247676
peak157310	chr4:119437479-119437879	rs67265404:C:T	peak247704	chr4:119437546-119437813	rs4001305:G:T	0.996	peak247704
peak157328	chr4:119706856-119708118	rs2583616:G:A	peak247729	chr4:119707285-119707723	rs2714961:T:C	1	peak247729
peak157369	chr4:120829097-120829952	rs1349347:T:G	peak247791	chr4:120829368-120829848	rs1376099:G:C	0.999	peak247791
peak157442	chr4:121691381-121691828	rs1383232:T:C	peak247888	chr4:121691438-121691746	rs12649582:A:G	0.994	peak247888
peak157604	chr4:123606864-123607596	rs752500:A:G	peak248093	chr4:123607016-123607417	rs752500:A:G	1	peak248093
peak157677	chr4:124555928-124556282	rs13108726:C:T	peak248195	chr4:124556014-124556267	rs13108726:C:T	1	peak248195
peak157918	chr4:128957903-128958705	rs921377:G:A	peak248576	chr4:128958224-128958572	rs921375:C:G	0.999	peak248576
peak157974	chr4:130336469-130337268	rs1509448:A:G	peak248679	chr4:130336630-130336927	rs6534785:T:C	0.999	peak248679
peak158000	chr4:131087065-131087643	rs7692456:C:A	peak248722	chr4:131087109-131087354	rs7692456:C:A	1	peak248722
peak15808	chr1:203860253-203862201	rs4951275:G:A	peak23906	chr1:203860307-203860675	rs12141036:C:T	0.978	peak23906
peak158166	chr4:135735610-135736055	rs11736828:G:T	peak248972	chr4:135735632-135736021	rs11736828:G:T	1	peak248972
peak158167	chr4:135739256-135740233	rs7655183:A:G	peak248973	chr4:135739399-135739768	rs7654579:C:T	1	peak248973,peak248974
peak158293	chr4:138591856-138592224	rs1450440:G:A	peak249169	chr4:138591910-138592180	rs4863563:C:A	0.996	peak249169
peak158380	chr4:139481191-139481945	rs61313984:T:C	peak249285	chr4:139481211-139481883	rs61313984:T:C	1	peak249285
peak158403	chr4:139609661-139610039	rs34957786:C:T	peak249324	chr4:139609683-139609924	rs34006853:C:CA	0.944	peak249324
peak158407	chr4:139628201-139628920	rs706344:A:G	peak249328	chr4:139628227-139628733	rs706344:A:G	1	peak249328
peak158616	chr4:141144243-141144555	rs2636767:A:G	peak249600	chr4:141144271-141144550	rs2636767:A:G	1	peak249600
peak158795	chr4:143558759-143560137	rs17690441:C:A	peak249839	chr4:143558866-143560061	rs17690441:C:A	1	peak249839
peak158885	chr4:145339102-145339778	rs7668650:T:C	peak249967	chr4:145339130-145339679	rs7668650:T:C	1	peak249967
peak159112	chr4:148058407-148058691	rs7697204:C:T	peak250290	chr4:148058407-148058643	rs34690971:A:AT	0.958	peak250290
peak159113	chr4:148059616-148061020	rs10013413:C:T	peak250291	chr4:148059647-148060007	rs10027275:G:C	0.961	peak250291,peak250292
peak159510	chr4:152935628-152937423	rs4696365:T:A	peak250892	chr4:152935686-152937285	rs4696365:T:A	1	peak250892
peak159546	chr4:153269411-153270769	rs41280463:G:A	peak250953	chr4:153269630-153270149	rs41280463:G:A	1	peak250954,peak250953
peak159645	chr4:154119153-154119729	rs7685452:A:T	peak251096	chr4:154119367-154119652	rs4696530:G:C	0.993	peak251096
peak159737	chr4:155494042-155494661	rs717695:C:A	peak251244	chr4:155494122-155494592	rs717695:C:A	1	peak251244
peak159811	chr4:156168931-156169613	rs4286588:G:A	peak251343	chr4:156168969-156169458	rs4286588:G:A	1	peak251343
peak159815	chr4:156191188-156191782	rs2341218:A:G	peak251346	chr4:156191395-156191755	rs57439753:G:T	0.999	peak251346
peak159825	chr4:156378103-156378808	rs41518444:C:G	peak251360	chr4:156378145-156378431	rs41518444:C:G	1	peak251360
peak15986	chr1:205267074-205267688	rs1768587:C:T	peak24192	chr1:205267153-205267592	rs7367930:A:G	0.999	peak24192
peak160030	chr4:158956131-158956798	rs7661919:G:A	peak251647	chr4:158956276-158956705	rs6844996:T:C	0.967	peak251647
peak160162	chr4:160489327-160490371	rs1595665:T:C	peak251827	chr4:160489505-160490017	rs1595665:T:C	1	peak251827
peak160271	chr4:163180160-163180528	rs1479090:T:A	peak251990	chr4:163180191-163180481	rs1479090:T:A	1	peak251990
peak16028	chr1:205492216-205492617	rs1041309:T:C	peak24244	chr1:205492235-205492590	rs1041309:T:C	1	peak24244
peak160289	chr4:163404060-163405066	rs1441718:A:G	peak252017	chr4:163404107-163404416	rs1441718:A:G	1	peak252017,peak252018
peak160418	chr4:165298725-165299081	rs56235876:T:C	peak252197	chr4:165298734-165299007	rs56235876:T:C	1	peak252197
peak160429	chr4:165355799-165356352	rs72701645:G:A	peak252220	chr4:165356021-165356301	rs72701645:G:A	1	peak252220
peak16045	chr1:205605858-205606424	rs34008697:A:G	peak24269	chr1:205605912-205606390	rs34008697:A:G	1	peak24269
peak160542	chr4:167622560-167623634	rs10007179:C:A	peak252373	chr4:167622735-167623477	rs1518182:T:C	0.999	peak252373
peak160708	chr4:169309246-169310051	rs55909907:C:T	peak252616	chr4:169309311-169309877	rs55909907:C:T	1	peak252616
peak160769	chr4:170037337-170038100	rs7657455:C:G	peak252711	chr4:170037512-170037863	rs7657455:C:G	1	peak252711
peak160867	chr4:172725553-172726671	rs11132960:C:T	peak252857	chr4:172725687-172726496	rs70944417:G:GCCAGTCC	0.989	peak252857
peak160995	chr4:174461472-174462363	rs2195039:A:G	peak253049	chr4:174461494-174462179	rs2195039:A:G	1	peak253049
peak161153	chr4:177265764-177266423	rs17725320:A:G	peak253277	chr4:177265801-177266065	rs17725320:A:G	1	peak253277
peak161204	chr4:178395866-178396217	rs1510630:C:T	peak253360	chr4:178395869-178396132	rs1510630:C:T	1	peak253360
peak161363	chr4:182809766-182810093	rs17267298:T:C	peak253627	chr4:182809784-182810061	rs62336291:T:C	0.999	peak253627
peak161445	chr4:183437947-183438395	rs4440266:G:A	peak253767	chr4:183438003-183438310	rs4440266:G:A	1	peak253767
peak161507	chr4:184066406-184067708	rs4862298:C:T	peak253866	chr4:184066692-184067551	rs4862298:C:T	1	peak253866
peak161509	chr4:184100318-184100617	rs17679120:G:A	peak253870	chr4:184100336-184100608	rs12499260:C:T	0.916	peak253870
peak161538	chr4:184329670-184330412	rs13149699:A:G	peak253921	chr4:184330033-184330352	rs13149699:A:G	1	peak253921
peak161598	chr4:184668375-184668924	rs55635512:G:T	peak254001	chr4:184668553-184668826	rs10015218:T:C	0.998	peak254001
peak161655	chr4:184937104-184938037	rs6815164:T:G	peak254083	chr4:184937431-184937743	rs10446837:A:G	1	peak254083
peak161718	chr4:185456053-185456475	rs4862533:T:A	peak254170	chr4:185456214-185456458	rs11307246:AC:A	0.999	peak254170
peak161787	chr4:185781652-185782945	rs60131767:G:A	peak254273	chr4:185781897-185782159	rs61590602:GGAGA:G	0.997	peak254273,peak254274
peak161813	chr4:185925755-185926408	rs11723991:A:C	peak254312	chr4:185925893-185926302	rs11723991:A:C	1	peak254312
peak161855	chr4:186172593-186172917	rs4241814:G:T	peak254361	chr4:186172622-186172906	rs4241814:G:T	1	peak254361
peak161925	chr4:186702345-186702812	rs327070:G:T	peak254480	chr4:186702366-186702772	rs950113:A:C	0.849	peak254480
peak161993	chr4:187941407-187941885	rs11943016:T:C	peak254611	chr4:187941522-187941799	rs11943016:T:C	1	peak254611
peak162445	chr5:1633217-1634591	rs111277130:C:T	peak255327	chr5:1633372-1634517	rs180709408:C:G	0.842	peak255327
peak162511	chr5:2183767-2184579	rs11741534:C:T	peak255500	chr5:2184004-2184314	rs13172851:C:T	0.931	peak255500
peak16263	chr1:207002527-207003189	rs2629647:A:G	peak24563	chr1:207002687-207003152	rs2629647:A:G	1	peak24563
peak162760	chr5:5135713-5136780	rs7720806:T:C	peak256155	chr5:5135940-5136627	rs7720806:T:C	1	peak256155
peak162773	chr5:5297874-5299094	rs6555347:A:G	peak256180	chr5:5298825-5299060	rs6555347:A:G	1	peak256179,peak256180
peak162782	chr5:5360660-5361652	rs10059715:A:G	peak256200	chr5:5361030-5361560	rs10052207:C:G	0.995	peak256200
peak16286	chr1:207118901-207119419	rs9943268:T:G	peak24602	chr1:207119134-207119429	rs9943268:T:G	1	peak24602
peak162888	chr5:6584725-6585077	rs79368141:G:A	peak256447	chr5:6584763-6585044	rs10539189:CGAGG:C	0.994	peak256447
peak162896	chr5:6598280-6598708	rs11743743:C:A	peak256455	chr5:6598353-6598655	rs11743743:C:A	1	peak256455
peak162897	chr5:6603327-6604178	rs11748532:C:T	peak256456	chr5:6603477-6604096	rs11748532:C:T	1	peak256456
peak162900	chr5:6611465-6612573	rs3733776:C:A	peak256459	chr5:6611927-6612305	rs3733775:A:G	0.995	peak256459
peak162918	chr5:6731554-6732175	rs1006148:T:C	peak256493	chr5:6731560-6731776	rs1006148:T:C	1	peak256493,peak256494
peak162940	chr5:6872441-6873949	rs275424:A:G	peak256534	chr5:6872497-6873756	rs275424:A:G	1	peak256534
peak16301	chr1:207239910-207241970	rs6673890:C:T	peak24626	chr1:207240012-207240256	rs76258276:G:A	0.999	peak24626
peak163103	chr5:9376497-9377243	rs194264:C:T	peak256853	chr5:9376682-9377156	rs194264:C:T	1	peak256853
peak163124	chr5:9528877-9529595	rs455538:C:G	peak256885	chr5:9528958-9529580	rs466158:G:T	0.998	peak256885
peak163128	chr5:9545772-9546916	rs55830667:G:A	peak256888	chr5:9545772-9546808	rs55830667:G:A	1	peak256888
peak163130	chr5:9558332-9559011	rs16883147:C:T	peak256890	chr5:9558368-9558853	rs16883147:C:T	1	peak256890
peak163180	chr5:10275807-10276587	rs3843011:G:C	peak257013	chr5:10275951-10276369	rs3843011:G:C	1	peak257013
peak163345	chr5:11732793-11734748	rs12652861:A:T	peak257299	chr5:11732985-11734206	rs12652861:A:T	1	peak257299,peak257300
peak163429	chr5:13378141-13378704	rs6554786:C:A	peak257433	chr5:13378139-13378632	rs6554786:C:A	1	peak257433
peak16343	chr1:207807441-207808291	rs761276:A:G	peak24683	chr1:207807779-207808155	rs2745972:T:C	0.991	peak24683
peak163758	chr5:16626820-16627258	rs181941:T:C	peak257985	chr5:16626884-16627225	rs257176:G:C	0.999	peak257985
peak163921	chr5:18465884-18466619	rs77372832:T:G	peak258209	chr5:18466133-18466447	rs6885334:C:A	1	peak258209
peak164122	chr5:23996550-23997301	rs10942018:C:G	peak258459	chr5:23997058-23997293	rs10942018:C:G	1	peak258458,peak258459
peak164165	chr5:25190478-25191051	rs112758294:G:A	peak258529	chr5:25190540-25190977	rs112758294:G:A	1	peak258529
peak164201	chr5:25978792-25979472	rs9885150:A:T	peak258593	chr5:25979161-25979421	rs9885150:A:T	1	peak258593
peak164354	chr5:30105785-30107469	rs4395645:C:G	peak258827	chr5:30106447-30107026	rs13172518:C:T	0.999	peak258827
peak164406	chr5:31268763-31269050	rs10940943:A:C	peak258908	chr5:31268760-31269042	rs11957560:T:C	0.995	peak258908
peak164465	chr5:32067775-32068676	rs12109819:C:T	peak259017	chr5:32067831-32068217	rs12109819:C:T	1	peak259017,peak259018
peak164594	chr5:33223465-33224376	rs6450965:C:T	peak259214	chr5:33223606-33223923	rs6450965:C:T	1	peak259214,peak259215
peak164606	chr5:33304613-33304903	rs72735147:A:C	peak259229	chr5:33304636-33304855	rs72735147:A:C	1	peak259229
peak164647	chr5:33808605-33809063	rs1445913:C:T	peak259297	chr5:33808788-33809027	rs1445913:C:T	1	peak259297
peak164695	chr5:34510867-34512420	rs6879561:C:T	peak259380	chr5:34510992-34511451	rs6879561:C:T	1	peak259380
peak164701	chr5:34537822-34538516	rs10040197:C:A	peak259390	chr5:34537980-34538326	rs10040197:C:A	1	peak259390
peak164720	chr5:34699710-34700306	rs6881866:A:T	peak259422	chr5:34699791-34700106	rs6881866:A:T	1	peak259422
peak164752	chr5:35023506-35024375	rs13155120:G:A	peak259469	chr5:35023608-35024278	rs67542136:G:A	0.929	peak259469
peak164792	chr5:35248814-35249687	rs7720958:A:G	peak259522	chr5:35249163-35249634	rs7720958:A:G	1	peak259522
peak164821	chr5:35815239-35816072	rs35081631:G:C	peak259562	chr5:35815604-35815917	rs35081631:G:C	1	peak259562
peak16486	chr1:209590369-209590859	rs713074:A:G	peak24909	chr1:209590489-209590777	rs713074:A:G	1	peak24909
peak165131	chr5:39257532-39258415	rs2897020:T:C	peak259998	chr5:39257564-39258234	rs6896829:A:G	0.998	peak259998
peak165268	chr5:40547636-40549132	rs73076472:T:C	peak260158	chr5:40547847-40548372	rs73076471:G:A	1	peak260158
peak165315	chr5:41000009-41000333	rs2167229:G:A	peak260226	chr5:41000023-41000325	rs1001420:G:A	0.999	peak260226
peak165320	chr5:41012072-41012881	rs6876879:A:G	peak260231	chr5:41012245-41012718	rs6876879:A:G	1	peak260231
peak1656	chr1:16184205-16184936	rs36086195:C:T	peak3180	chr1:16184237-16184873	rs10907282:A:G	0.826	peak3180
peak165601	chr5:44149377-44150944	rs4866869:T:G	peak260665	chr5:44150125-44150645	rs4866869:T:G	1	peak260665
peak165791	chr5:52731075-52732134	rs3096166:C:T	peak260916	chr5:52731590-52731977	rs3096166:C:T	1	peak260916
peak165834	chr5:52893097-52893516	rs1110350:A:G	peak260968	chr5:52893125-52893414	rs1110350:A:G	1	peak260968
peak165877	chr5:53335118-53335651	rs1423422:A:G	peak261028	chr5:53335121-53335388	rs1423422:A:G	1	peak261028
peak165927	chr5:54054812-54055750	rs156839:A:G	peak261102	chr5:54055147-54055522	rs156837:C:T	0.998	peak261102
peak166013	chr5:54702237-54703926	rs72757405:A:G	peak261210	chr5:54702434-54703793	rs72757405:A:G	1	peak261210
peak166020	chr5:54752860-54753547	rs1867687:A:G	peak261219	chr5:54753124-54753414	rs1867687:A:G	1	peak261219
peak166073	chr5:55232282-55234667	rs151202:G:A	peak261283	chr5:55232604-55234024	rs151202:G:A	1	peak261283
peak166186	chr5:56078369-56079400	rs16884766:T:G	peak261443	chr5:56078772-56079316	rs16884766:T:G	1	peak261443
peak166286	chr5:56917398-56918657	rs1466010:A:G	peak261578	chr5:56917482-56918494	rs1466007:A:C	0.998	peak261578
peak166318	chr5:57298196-57299485	rs13176773:G:T	peak261617	chr5:57298698-57299433	rs13176773:G:T	1	peak261617
peak166356	chr5:57834498-57835500	rs77133779:G:T	peak261674	chr5:57834811-57835455	rs77133779:G:T	1	peak261674
peak166377	chr5:58191435-58191820	rs10940601:C:T	peak261699	chr5:58191497-58191797	rs10940600:T:A	0.996	peak261699
peak166433	chr5:58794896-58795980	rs10805510:A:G	peak261767	chr5:58795356-58795786	rs10940626:T:A	0.999	peak261767
peak166520	chr5:59729369-59729712	rs7719147:T:G	peak261881	chr5:59729418-59729703	rs6877662:G:A	0.999	peak261881
peak166521	chr5:59729865-59730428	rs7719147:T:G	peak261882	chr5:59729914-59730280	rs7719147:T:G	1	peak261882
peak166874	chr5:65113940-65114680	rs10035130:A:G	peak262423	chr5:65114193-65114582	rs10035191:A:T	0.808	peak262423
peak16688	chr1:211648928-211649332	rs12741252:G:C	peak25193	chr1:211649013-211649298	rs12741252:G:C	1	peak25193
peak166991	chr5:66864374-66864952	rs41185:T:C	peak262610	chr5:66864513-66864862	rs36155:T:A	1	peak262610
peak166997	chr5:66891211-66891945	rs461702:A:G	peak262619	chr5:66891243-66891845	rs258083:T:C	0.999	peak262619
peak167103	chr5:67896375-67898518	rs35558461:G:A	peak262760	chr5:67896704-67896931	rs35558461:G:A	1	peak262760,peak262761,peak262762
peak16720	chr1:211894334-211894649	rs12126358:G:A	peak25258	chr1:211894353-211894610	rs12126358:G:A	1	peak25258
peak167315	chr5:71694948-71695542	rs11957557:C:T	peak263038	chr5:71695055-71695480	rs11957557:C:T	1	peak263038
peak167320	chr5:71778743-71779067	rs10061615:A:C	peak263046	chr5:71778750-71778989	rs12517242:A:G	1	peak263046
peak167581	chr5:74916473-74917371	rs6888163:A:G	peak263429	chr5:74916528-74917338	rs58284056:T:C	0.99	peak263429
peak167590	chr5:74957887-74958280	rs6884528:A:G	peak263438	chr5:74957938-74958230	rs6884528:A:G	1	peak263438
peak167653	chr5:76175811-76176389	rs34101768:G:A	peak263526	chr5:76175904-76176336	rs34101768:G:A	1	peak263526
peak167741	chr5:76755761-76757024	rs6896766:G:C	peak263644	chr5:76756072-76756642	rs6896766:G:C	1	peak263644,peak263645
peak167827	chr5:77645209-77646098	rs144792976:G:C	peak263761	chr5:77645444-77646007	rs144792976:G:C	1	peak263761
peak167833	chr5:77775358-77776799	rs254415:G:T	peak263770	chr5:77775415-77776659	rs254416:C:T	0.964	peak263770
peak168091	chr5:80668029-80669088	rs2081853:G:T	peak264125	chr5:80668039-80669067	rs2081853:G:T	1	peak264125
peak168188	chr5:81783471-81783738	rs461802:A:G	peak264260	chr5:81783478-81783730	rs461802:A:G	1	peak264260
peak168212	chr5:82106206-82107125	rs324911:T:A	peak264292	chr5:82106256-82106572	rs12515069:A:G	0.995	peak264292
peak168241	chr5:82365642-82366505	rs36038042:C:T	peak264327	chr5:82365680-82366391	rs36038042:C:T	1	peak264327
peak168826	chr5:92567715-92568885	rs6893563:T:C	peak265147	chr5:92567874-92568341	rs6893563:T:C	1	peak265147,peak265148
peak169142	chr5:96322179-96322620	rs17384294:C:T	peak265598	chr5:96322235-96322568	rs17384294:C:T	1	peak265598
peak169223	chr5:96957166-96957667	rs4360063:A:G	peak265702	chr5:96957194-96957487	rs7716222:C:A	0.999	peak265702
peak169329	chr5:99045691-99046447	rs6885458:G:A	peak265871	chr5:99045953-99046200	rs6885458:G:A	1	peak265871
peak169445	chr5:102099691-102100376	rs899044:G:A	peak266043	chr5:102099820-102100292	rs899044:G:A	1	peak266043
peak169554	chr5:103691754-103692164	rs665487:T:C	peak266181	chr5:103691822-103692082	rs665487:T:C	1	peak266181
peak169563	chr5:103989820-103991122	rs319130:G:C	peak266197	chr5:103990114-103990440	rs319130:G:C	1	peak266197
peak16965	chr1:214224536-214225373	rs7544104:T:C	peak25629	chr1:214224579-214225337	rs7530187:C:T	0.998	peak25629
peak169685	chr5:107556882-107557727	rs352605:C:T	peak266384	chr5:107557026-107557677	rs352605:C:T	1	peak266384
peak169757	chr5:109214866-109215999	rs6882037:C:T	peak266509	chr5:109215057-109215437	rs13181049:G:T	0.978	peak266509,peak266510
peak16981	chr1:214362092-214362916	rs3002297:A:G	peak25652	chr1:214362172-214362827	rs3002297:A:G	1	peak25652
peak169865	chr5:110057976-110058729	rs1455547:C:T	peak266655	chr5:110058133-110058554	rs1455546:C:T	0.995	peak266655
peak169873	chr5:110106638-110108064	rs11738137:A:G	peak266668	chr5:110107646-110107896	rs11738137:A:G	1	peak266667,peak266668
peak170036	chr5:112338372-112339398	rs2042884:A:G	peak266921	chr5:112338571-112339341	rs7720180:A:G	0.995	peak266921
peak170052	chr5:112492188-112492799	rs341325:A:G	peak266941	chr5:112492345-112492681	rs341318:G:A	0.999	peak266941
peak170124	chr5:113118788-113120032	rs4078252:C:T	peak267048	chr5:113118848-113119907	rs4078252:C:T	1	peak267048
peak170239	chr5:114407647-114408278	rs2125146:C:A	peak267231	chr5:114407730-114408188	rs2125146:C:A	1	peak267231
peak170345	chr5:115647860-115648678	rs7723429:C:G	peak267382	chr5:115648050-115648494	rs7723429:C:G	1	peak267382
peak170347	chr5:115656040-115656728	rs10478241:T:A	peak267384	chr5:115656095-115656311	rs10038964:G:A	0.999	peak267384
peak170348	chr5:115656990-115658174	rs3984989:A:G	peak267386	chr5:115657135-115657719	rs3984989:A:G	1	peak267386
peak170355	chr5:115735062-115736315	rs11948228:G:A	peak267397	chr5:115735078-115735492	rs6863733:T:C	0.997	peak267397
peak170361	chr5:115785121-115785939	rs12516716:C:T	peak267408	chr5:115785473-115785838	rs12516736:G:C	0.988	peak267408
peak170550	chr5:118675156-118675806	rs12520595:C:T	peak267664	chr5:118675274-118675617	rs2376685:C:T	0.999	peak267664
peak170598	chr5:119355217-119357230	rs3797341:T:C	peak267744	chr5:119356705-119357048	rs3797341:T:C	1	peak267744,peak267743
peak170764	chr5:122492566-122493668	rs6865644:C:T	peak267996	chr5:122492736-122493039	rs62381706:A:T	0.992	peak267996
peak171000	chr5:125209589-125210151	rs1439570:A:G	peak268318	chr5:125209640-125210003	rs41357845:G:A	0.991	peak268318
peak171036	chr5:126001819-126003042	rs6859472:C:T	peak268375	chr5:126002203-126002968	rs6859472:C:T	1	peak268375
peak171467	chr5:132434709-132435620	rs28655019:C:A	peak269037	chr5:132434794-132435340	rs11741543:G:T	1	peak269037
peak171548	chr5:133017876-133018315	rs11242131:C:T	peak269153	chr5:133017925-133018218	rs11242131:C:T	1	peak269153
peak171574	chr5:133287530-133287825	rs7724443:A:G	peak269198	chr5:133287563-133287804	rs7707141:T:C	0.989	peak269198
peak171902	chr5:136082144-136082799	rs28595855:C:A	peak269812	chr5:136082372-136082775	rs28595855:C:A	1	peak269812
peak171966	chr5:137304158-137304858	rs916850:A:T	peak269959	chr5:137304193-137304533	rs916850:A:T	1	peak269959
peak171969	chr5:137348741-137349289	rs7714656:T:C	peak269965	chr5:137348806-137349221	rs2522215:G:A	0.997	peak269965
peak172374	chr5:141174644-141175274	rs2907329:C:G	peak270589	chr5:141174715-141175153	rs2907329:C:G	1	peak270589
peak172541	chr5:142441683-142441976	rs13356633:C:T	peak270839	chr5:142441706-142441952	rs11956248:T:G	0.99	peak270839
peak172773	chr5:143749416-143750285	rs17100771:T:C	peak271153	chr5:143749904-143750253	rs17100771:T:C	1	peak271153
peak172826	chr5:145463569-145464607	rs3113633:A:T	peak271239	chr5:145463668-145463973	rs3113633:A:T	1	peak271239,peak271240
peak17302	chr1:219757895-219758328	rs4846587:T:C	peak26125	chr1:219757937-219758285	rs6670408:G:A	1	peak26125
peak173109	chr5:148978902-148979713	rs6872172:G:C	peak271633	chr5:148979077-148979587	rs6872701:C:G	1	peak271633
peak173248	chr5:149671514-149672139	rs55978410:G:A	peak271838	chr5:149671566-149672098	rs55978410:G:A	1	peak271838
peak173446	chr5:151022501-151024065	rs4958872:C:T	peak272131	chr5:151023065-151024011	rs4958872:C:T	1	peak272131
peak173500	chr5:151239265-151239763	rs72794132:C:T	peak272200	chr5:151239294-151239603	rs72794132:C:T	1	peak272200
peak173505	chr5:151298062-151298997	rs6898671:T:A	peak272209	chr5:151298091-151298779	rs6898671:T:A	1	peak272209
peak173664	chr5:154058539-154059985	rs816024:G:A	peak272477	chr5:154058994-154059467	rs816025:A:G	0.963	peak272477
peak17373	chr1:220702801-220703124	rs405196:A:G	peak26235	chr1:220702820-220703071	rs379218:C:T	0.999	peak26235
peak173796	chr5:155268770-155269268	rs12514142:T:G	peak272693	chr5:155268797-155269323	rs12514142:T:G	1	peak272693
peak173844	chr5:156198982-156199517	rs4704992:C:A	peak272757	chr5:156199095-156199377	rs4704786:G:A	1	peak272757
peak173845	chr5:156200969-156202248	rs62380744:A:G	peak272758	chr5:156200986-156201298	rs12188348:A:C	0.999	peak272758,peak272759
peak173858	chr5:156411136-156412359	rs2036557:C:T	peak272779	chr5:156411227-156411802	rs2036557:C:T	1	peak272779,peak272780
peak17386	chr1:220751711-220752012	rs443071:C:G	peak26251	chr1:220751753-220752003	rs393585:G:T	0.995	peak26251
peak174146	chr5:159402147-159402813	rs12188300:A:T	peak273159	chr5:159402246-159402577	rs12188300:A:T	1	peak273159
peak174201	chr5:159933841-159934956	rs34235993:T:C	peak273243	chr5:159933966-159934838	rs35049562:C:T	0.996	peak273243
peak174375	chr5:163281232-163282147	rs2964379:C:T	peak273508	chr5:163281437-163281920	rs2964378:C:G	0.999	peak273508
peak174399	chr5:163473675-163474010	rs11955217:G:A	peak273538	chr5:163473726-163473959	rs11955217:G:A	1	peak273538
peak174405	chr5:163509234-163509616	rs1472376:A:G	peak273545	chr5:163509318-163509578	rs1472376:A:G	1	peak273545
peak174556	chr5:167378360-167379854	rs7726117:A:C	peak273749	chr5:167378942-167379686	rs7726117:A:C	1	peak273749
peak174558	chr5:167389611-167390110	rs28555227:A:G	peak273752	chr5:167389642-167389891	rs28555227:A:G	1	peak273752
peak174559	chr5:167398803-167399507	rs1895265:A:C	peak273753	chr5:167399135-167399428	rs1895265:A:C	1	peak273753
peak174715	chr5:169139625-169140767	rs7700596:G:A	peak274052	chr5:169139718-169140129	rs7700596:G:A	1	peak274052,peak274053
peak17495	chr1:221675561-221676784	rs12755319:G:A	peak26390	chr1:221675936-221676469	rs12755319:G:A	1	peak26390
peak175091	chr5:172788536-172790075	rs745023:C:T	peak274662	chr5:172788746-172789656	rs745023:C:T	1	peak274662,peak274663
peak175126	chr5:172897484-172898124	rs472959:G:A	peak274708	chr5:172897660-172898082	rs472959:G:A	1	peak274708
peak175196	chr5:173498867-173500445	rs13160187:C:T	peak274830	chr5:173499076-173499929	rs13180601:T:C	0.995	peak274830,peak274831
peak17523	chr1:221845743-221846590	rs6673674:T:C	peak26429	chr1:221845839-221846478	rs6673674:T:C	1	peak26429
peak175252	chr5:173860415-173861058	rs875741:G:A	peak274910	chr5:173860556-173861008	rs875742:G:A	0.999	peak274910
peak17526	chr1:221937384-221938245	rs2800853:T:C	peak26435	chr1:221937499-221937907	rs2800853:T:C	1	peak26435
peak175310	chr5:174608441-174609589	rs6866646:G:A	peak275016	chr5:174608611-174609084	rs2029477:C:G	0.998	peak275016
peak175442	chr5:176519766-176520577	rs11740771:T:G	peak275243	chr5:176519868-176520474	rs11740771:T:G	1	peak275243
peak17550	chr1:222093541-222094058	rs7542307:C:T	peak26467	chr1:222093594-222094003	rs7542307:C:T	1	peak26467
peak175648	chr5:178585375-178585841	rs262042:A:G	peak275630	chr5:178585551-178585812	rs262042:A:G	1	peak275630
peak175726	chr5:179558958-179560204	rs7703730:C:A	peak275829	chr5:179559366-179560161	rs6896940:G:C	0.99	peak275829,peak275828
peak17575	chr1:222529742-222530650	rs1487525:A:G	peak26504	chr1:222529992-222530384	rs4846760:C:T	0.967	peak26504
peak175814	chr5:180177201-180177942	rs7701001:G:A	peak275972	chr5:180177282-180177762	rs744251:C:G	0.993	peak275972
peak176205	chr6:3022864-3024389	rs13193229:T:A	peak276708	chr6:3023702-3024366	rs13193229:T:A	1	peak276708
peak176241	chr6:3264152-3265007	rs13193012:T:C	peak276761	chr6:3264337-3264722	rs4324814:C:G	0.997	peak276761
peak176257	chr6:3340017-3341206	rs6925949:G:A	peak276792	chr6:3340269-3341155	rs7762227:G:C	0.967	peak276792
peak176270	chr6:3380227-3381316	rs4959236:A:G	peak276808	chr6:3380461-3381163	rs4959236:A:G	1	peak276808
peak176337	chr6:3839192-3839647	rs9503752:T:A	peak276929	chr6:3839223-3839587	rs9503752:T:A	1	peak276929
peak176511	chr6:5740834-5741990	rs72821914:A:G	peak277202	chr6:5741385-5741784	rs72821914:A:G	1	peak277202
peak176579	chr6:6658893-6659218	rs7776213:C:G	peak277310	chr6:6658890-6659116	rs7775878:C:G	0.846	peak277310
peak17662	chr1:223303331-223303777	rs2203763:A:G	peak26627	chr1:223303398-223303674	rs2203763:A:G	1	peak26627
peak176623	chr6:6856391-6857814	rs7761356:C:T	peak277365	chr6:6856458-6857633	rs7761356:C:T	1	peak277365
peak176721	chr6:7439140-7439812	rs4959438:T:C	peak277505	chr6:7439273-7439489	rs56029523:G:A	0.984	peak277505
peak176742	chr6:7699071-7699806	rs911748:A:T	peak277537	chr6:7699127-7699781	rs6597281:C:A	0.998	peak277537
peak176783	chr6:8110735-8111386	rs9379166:T:C	peak277587	chr6:8110801-8111132	rs9379166:T:C	1	peak277587
peak176997	chr6:11675731-11676053	rs6917101:A:G	peak277911	chr6:11675758-11676014	rs6936345:G:A	1	peak277911
peak177172	chr6:13452756-13453414	rs2841561:C:T	peak278162	chr6:13452809-13453094	rs2841561:C:T	1	peak278162,peak278163
peak177173	chr6:13453840-13454208	rs2841562:C:T	peak278164	chr6:13453885-13454210	rs2841563:C:T	0.999	peak278164
peak177174	chr6:13454420-13455319	rs2841563:C:T	peak278165	chr6:13454578-13455285	rs2841563:C:T	1	peak278165
peak177185	chr6:13511788-13513117	rs2841535:G:A	peak278181	chr6:13511900-13512568	rs2841535:G:A	1	peak278181
peak177234	chr6:14070400-14070852	rs9396470:A:G	peak278252	chr6:14070483-14070787	rs10484345:G:A	0.935	peak278252
peak177447	chr6:15997607-15998247	rs6917224:G:A	peak278538	chr6:15997737-15998226	rs6917224:G:A	1	peak278538
peak177535	chr6:16716418-16716837	rs1150627:A:G	peak278662	chr6:16716483-16716811	rs756779:T:C	0.999	peak278662
peak177580	chr6:17002174-17002448	rs9464977:G:A	peak278714	chr6:17002193-17002430	rs9464977:G:A	1	peak278714
peak177619	chr6:17580084-17581296	rs9371002:G:A	peak278766	chr6:17580438-17581108	rs9371002:G:A	1	peak278766
peak177696	chr6:18327663-18328023	rs17680656:T:C	peak278866	chr6:18327713-18327969	rs17680656:T:C	1	peak278866
peak177788	chr6:20126146-20126674	rs71560117:A:G	peak278997	chr6:20126161-20126430	rs71560117:A:G	1	peak278997
peak177791	chr6:20130313-20131450	rs7772589:T:C	peak279001	chr6:20130458-20131265	rs7752499:C:T	0.9	peak279001
peak177886	chr6:21164808-21165356	rs7776158:G:A	peak279134	chr6:21164968-21165250	rs6916053:T:G	0.989	peak279134
peak178203	chr6:25881686-25882589	rs531750:C:G	peak279601	chr6:25881938-25882572	rs531750:C:G	1	peak279601
peak178409	chr6:28443018-28443720	rs2531803:T:G	peak279872	chr6:28443179-28443686	rs2531803:T:G	1	peak279872
peak178491	chr6:29702365-29703044	rs4711196:G:T	peak280001	chr6:29702531-29702880	rs4711196:G:T	1	peak280001
peak178494	chr6:29722920-29724479	rs1362125:T:A	peak280004	chr6:29722977-29724405	rs2072895:C:G	0.996	peak280004
peak178513	chr6:29967131-29967983	rs9260756:C:T	peak280043	chr6:29967491-29967830	rs9260759:C:T	0.998	peak280043
peak178553	chr6:30453418-30454135	rs9468774:A:G	peak280113	chr6:30453605-30454003	rs9295886:C:T	0.999	peak280113
peak178614	chr6:30787896-30788364	rs16897899:C:A	peak280190	chr6:30787971-30788324	rs13197105:A:G	0.998	peak280190
peak178626	chr6:30845102-30845844	rs2517577:C:A	peak280207	chr6:30845166-30845655	rs2517577:C:A	1	peak280207
peak178654	chr6:31149285-31150696	rs9263766:G:A	peak280266	chr6:31149716-31150288	rs9263766:G:A	1	peak280266,peak280267
peak178658	chr6:31185448-31187160	rs17197375:C:T	peak280274	chr6:31185808-31186795	rs11970124:G:A	1	peak280274
peak178663	chr6:31209183-31209507	rs3132506:T:C	peak280280	chr6:31209219-31209459	rs3130511:C:T	0.851	peak280280
peak178668	chr6:31307717-31308993	rs9717841:C:T	peak280287	chr6:31307972-31308832	rs9717841:C:T	1	peak280287
peak178673	chr6:31374173-31374465	rs9266510:T:C	peak280291	chr6:31374173-31374449	rs9266510:T:C	1	peak280291
peak178837	chr6:32668205-32668725	rs3134996:A:T	peak280535	chr6:32668282-32668712	rs3134998:T:C	1	peak280535
peak178852	chr6:32861118-32861803	rs9276818:T:G	peak280555	chr6:32861136-32861685	rs9276818:T:G	1	peak280555
peak178877	chr6:33053009-33053875	rs3130587:A:G	peak280589	chr6:33053197-33053742	rs3128953:A:G	0.999	peak280589
peak178956	chr6:33702403-33702718	rs6938056:C:T	peak280711	chr6:33702430-33702694	rs11317348:TA:T	0.987	peak280711
peak178962	chr6:33727905-33728822	rs13204162:C:T	peak280723	chr6:33727973-33728448	rs13204162:C:T	1	peak280723,peak280724
peak178963	chr6:33731765-33732599	rs4713671:T:C	peak280725	chr6:33732041-33732362	rs4713670:T:C	1	peak280725
peak179344	chr6:36734904-36736202	rs236448:A:C	peak281365	chr6:36735031-36736120	rs236448:A:C	1	peak281365
peak179366	chr6:36907764-36908295	rs4475317:A:G	peak281402	chr6:36907826-36908213	rs4475317:A:G	1	peak281402
peak179377	chr6:36997957-36999332	rs13217627:G:A	peak281423	chr6:36998068-36998882	rs13217627:G:A	1	peak281423,peak281424
peak179392	chr6:37070480-37070780	rs913499:A:G	peak281441	chr6:37070504-37070767	rs913499:A:G	1	peak281441
peak179578	chr6:38876458-38876852	rs9366982:T:C	peak281713	chr6:38876513-38876781	rs35899767:GT:G	0.99	peak281713
peak179678	chr6:39972468-39973451	rs2475807:T:A	peak281874	chr6:39972731-39973068	rs2475807:T:A	1	peak281874,peak281875
peak179756	chr6:41100804-41101211	rs62396300:G:C	peak282057	chr6:41100855-41101235	rs72856260:G:T	0.968	peak282057
peak179866	chr6:42200001-42200458	rs2180174:T:C	peak282248	chr6:42200104-42200419	rs2180172:T:C	0.999	peak282248
peak179994	chr6:43436223-43437256	rs9349256:G:A	peak282431	chr6:43436489-43436930	rs9349256:G:A	1	peak282431
peak180001	chr6:43497468-43497767	rs79769045:C:T	peak282444	chr6:43497479-43497774	rs79769045:C:T	1	peak282444
peak180046	chr6:43833184-43834057	rs12660375:C:T	peak282505	chr6:43833752-43834040	rs62401198:C:T	0.898	peak282505
peak180069	chr6:43934918-43935549	rs1326141:G:A	peak282539	chr6:43934976-43935324	rs1326141:G:A	1	peak282539
peak180198	chr6:44820005-44820784	rs12209944:G:C	peak282735	chr6:44820375-44820723	rs12209944:G:C	1	peak282735
peak180213	chr6:45191323-45192326	rs6920046:A:C	peak282750	chr6:45191429-45191725	rs6919873:A:G	0.999	peak282750
peak180282	chr6:46217484-46218404	rs4530856:A:C	peak282862	chr6:46217646-46218100	rs4530856:A:C	1	peak282862
peak180295	chr6:46357549-46358531	rs7770495:T:G	peak282879	chr6:46357594-46357946	rs7770495:T:G	1	peak282879,peak282880
peak1804	chr1:17236888-17237721	rs2977306:T:C	peak3388	chr1:17237015-17237702	rs2977306:T:C	1	peak3388
peak18043	chr1:227268706-227269394	rs2063661:A:G	peak27223	chr1:227268797-227269353	rs2063661:A:G	1	peak27223
peak180453	chr6:48048319-48048837	rs332558:T:A	peak283099	chr6:48048491-48048763	rs332558:T:A	1	peak283099
peak180523	chr6:49569799-49571229	rs9395512:C:T	peak283207	chr6:49569838-49570166	rs9369908:G:A	1	peak283207,peak283208
peak180551	chr6:50118353-50118829	rs1340843:A:G	peak283249	chr6:50118382-50118796	rs41402445:G:A	0.941	peak283249
peak18059	chr1:227447392-227448128	rs6682883:G:A	peak27243	chr1:227447542-227448035	rs6682883:G:A	1	peak27243
peak180628	chr6:51743824-51744570	rs1507911:G:A	peak283379	chr6:51743961-51744474	rs3061729:A:ATT	0.999	peak283379
peak180632	chr6:51787940-51788867	rs2182504:C:G	peak283386	chr6:51788108-51788496	rs1326562:T:G	1	peak283386
peak180639	chr6:51887866-51888236	rs1321514:C:T	peak283395	chr6:51887925-51888193	rs1321514:C:T	1	peak283395
peak180643	chr6:51972450-51973165	rs9367468:C:T	peak283403	chr6:51972590-51973044	rs9296668:A:G	0.998	peak283403
peak180820	chr6:53425210-53425971	rs6919860:C:G	peak283649	chr6:53425340-53425701	rs6919860:C:G	1	peak283649
peak180829	chr6:53464494-53466293	rs593532:T:C	peak283659	chr6:53464562-53465535	rs593532:T:C	1	peak283659,peak283660
peak180849	chr6:53584681-53585180	rs1317778:C:G	peak283697	chr6:53584791-53585098	rs1317778:C:G	1	peak283697
peak180863	chr6:53643207-53644050	rs6925489:C:T	peak283715	chr6:53643384-53644038	rs6925850:A:G	0.987	peak283715
peak180864	chr6:53645449-53646149	rs4715409:C:T	peak283716	chr6:53645476-53645813	rs7739121:A:C	0.994	peak283716
peak180867	chr6:53665436-53666564	rs77374381:A:G	peak283720	chr6:53666317-53666552	rs77374381:A:G	1	peak283720,peak283719
peak180868	chr6:53673045-53674002	rs73741365:C:T	peak283722	chr6:53673132-53673761	rs73741365:C:T	1	peak283722
peak18089	chr1:227887041-227888181	rs4233230:G:T	peak27300	chr1:227887128-227888091	rs4233230:G:T	1	peak27300
peak180909	chr6:54074505-54075252	rs9370261:C:T	peak283783	chr6:54074624-54075230	rs9370261:C:T	1	peak283783
peak180936	chr6:54621048-54621653	rs10447377:G:T	peak283828	chr6:54621331-54621619	rs10447377:G:T	1	peak283828
peak181021	chr6:56408883-56409399	rs9349821:T:A	peak283951	chr6:56408883-56409332	rs9942454:C:T	1	peak283951
peak181234	chr6:60687068-60687654	rs4131718:T:G	peak284141	chr6:60687106-60687477	rs4131718:T:G	1	peak284141
peak181339	chr6:63426609-63427680	rs1723535:A:G	peak284288	chr6:63426749-63427378	rs1723535:A:G	1	peak284288
peak181441	chr6:64672100-64672969	rs12203072:C:T	peak284443	chr6:64672162-64672439	rs12203072:C:T	1	peak284443
peak181629	chr6:70119066-70120105	rs6455355:A:G	peak284743	chr6:70119218-70119993	rs6455355:A:G	1	peak284743
peak181681	chr6:70966925-70967618	rs1111994:T:C	peak284827	chr6:70967087-70967442	rs1111994:T:C	1	peak284827
peak18172	chr1:228646632-228648540	rs35724040:A:T	peak27460	chr1:228646655-228648473	rs6426507:A:T	0.95	peak27460
peak181761	chr6:72218138-72218465	rs72939725:C:T	peak284955	chr6:72218192-72218451	rs72939725:C:T	1	peak284955
peak181789	chr6:72864942-72865939	rs2840795:A:G	peak284986	chr6:72865501-72865817	rs2840795:A:G	1	peak284986
peak181841	chr6:73609401-73609758	rs1741894:G:A	peak285076	chr6:73609457-73609746	rs1691341:A:G	1	peak285076
peak181984	chr6:75673262-75674555	rs72886879:C:G	peak285287	chr6:75673865-75674385	rs72886878:T:C	1	peak285287
peak18199	chr1:228830075-228831527	rs4600015:C:T	peak27502	chr1:228830127-228830924	rs2639760:A:G	0.999	peak27502,peak27503
peak182050	chr6:76942018-76943190	rs9361175:G:T	peak285389	chr6:76942172-76942867	rs9361175:G:T	1	peak285389
peak182128	chr6:78526098-78526787	rs11961886:G:C	peak285524	chr6:78526425-78526762	rs11961886:G:C	1	peak285524
peak182186	chr6:79614703-79615326	rs2812683:T:C	peak285627	chr6:79614911-79615242	rs10081125:G:C	0.991	peak285627
peak182221	chr6:79872337-79872635	rs346315:C:T	peak285670	chr6:79872353-79872613	rs346316:C:T	0.997	peak285670
peak182232	chr6:80020036-80021366	rs239576:G:A	peak285686	chr6:80020407-80021079	rs239577:A:G	0.872	peak285686
peak182273	chr6:80573249-80574008	rs4315973:T:C	peak285751	chr6:80573624-80573905	rs4315973:T:C	1	peak285751
peak182285	chr6:81120019-81121090	rs7742649:A:G	peak285782	chr6:81120299-81120731	rs7742061:C:T	1	peak285782
peak182366	chr6:82015552-82016142	rs7741179:T:C	peak285888	chr6:82015691-82016021	rs7741179:T:C	1	peak285888
peak182421	chr6:83183294-83184158	rs643160:G:A	peak285979	chr6:83183462-83184116	rs524068:A:C	0.999	peak285979
peak182438	chr6:83413045-83413435	rs13193879:T:C	peak286002	chr6:83413120-83413415	rs13193879:T:C	1	peak286002
peak182458	chr6:83590336-83590968	rs2324447:C:T	peak286028	chr6:83590489-83590784	rs2324447:C:T	1	peak286028
peak18250	chr1:229117552-229118455	rs2318322:T:A	peak27562	chr1:229117567-229118367	rs2318322:T:A	1	peak27562
peak18251	chr1:229121651-229122239	rs7553250:G:A	peak27563	chr1:229121898-229122184	rs34726851:ATTG:A	0.994	peak27563
peak182550	chr6:84908553-84908855	rs62420746:G:A	peak286161	chr6:84908566-84908819	rs62420746:G:A	1	peak286161
peak182579	chr6:85389134-85389803	rs532366:C:T	peak286209	chr6:85389315-85389759	rs493641:T:C	0.996	peak286209
peak182609	chr6:85623202-85623537	rs12205013:C:T	peak286251	chr6:85623244-85623472	rs12205013:C:T	1	peak286251
peak182743	chr6:87755641-87756429	rs7754587:A:T	peak286458	chr6:87755699-87756212	rs4707400:C:G	1	peak286458
peak182927	chr6:89951542-89952333	rs2236181:T:C	peak286734	chr6:89951609-89952111	rs2236181:T:C	1	peak286734
peak182985	chr6:90386854-90387568	rs1349431:T:G	peak286830	chr6:90387005-90387350	rs1349431:T:G	1	peak286830
peak183046	chr6:91606030-91606866	rs2039501:A:G	peak286924	chr6:91606243-91606769	rs2039501:A:G	1	peak286924
peak183138	chr6:94547965-94548644	rs2208173:A:G	peak287062	chr6:94548275-94548529	rs2208173:A:G	1	peak287062
peak183160	chr6:95543658-95546017	rs62417787:C:T	peak287136	chr6:95544451-95545641	rs62417787:C:T	1	peak287136,peak287137
peak183304	chr6:98870897-98871525	rs9388788:T:C	peak287335	chr6:98870939-98871475	rs9375713:A:G	1	peak287335
peak183313	chr6:99032148-99032896	rs926866:G:C	peak287348	chr6:99032196-99032731	rs926866:G:C	1	peak287348
peak183348	chr6:99514840-99516435	rs2209156:C:G	peak287388	chr6:99514899-99516206	rs2209156:C:G	1	peak287388
peak183562	chr6:104228210-104228501	rs2494109:C:T	peak287726	chr6:104228259-104228484	rs2494109:C:T	1	peak287726
peak183772	chr6:106771948-106773077	rs3127634:G:C	peak288014	chr6:106772302-106772839	rs3127634:G:C	1	peak288014
peak184002	chr6:108971071-108972153	rs12213775:C:A	peak288353	chr6:108971152-108971847	rs4992383:C:A	0.997	peak288353,peak288354
peak184048	chr6:109395446-109395740	rs12524273:T:C	peak288415	chr6:109395460-109395731	rs12524273:T:C	1	peak288415
peak184150	chr6:110883274-110883822	rs1279592:A:T	peak288571	chr6:110883517-110883775	rs1279591:T:C	0.992	peak288571
peak184242	chr6:111585457-111586040	rs1883136:C:A	peak288686	chr6:111585622-111585990	rs1883136:C:A	1	peak288686
peak184351	chr6:112198590-112199196	rs4945898:T:C	peak288834	chr6:112198653-112199175	rs4945898:T:C	1	peak288834
peak184414	chr6:113306358-113307082	rs59901483:G:A	peak288918	chr6:113306574-113306950	rs3851194:T:C	0.977	peak288918
peak184439	chr6:113574161-113574754	rs12204459:C:T	peak288950	chr6:113574200-113574555	rs12204459:C:T	1	peak288950
peak184468	chr6:113736796-113737762	rs7747859:A:G	peak288979	chr6:113736988-113737520	rs7747859:A:G	1	peak288979
peak184570	chr6:115766790-115767526	rs10872138:A:T	peak289131	chr6:115766841-115767518	rs10872138:A:T	1	peak289131
peak184630	chr6:116299610-116300023	rs10456906:C:A	peak289215	chr6:116299721-116299997	rs10456906:C:A	1	peak289215
peak184633	chr6:116306833-116308376	rs115283081:A:G	peak289218	chr6:116307022-116307419	rs115283081:A:G	1	peak289218
peak184676	chr6:116515168-116515493	rs881864:T:C	peak289265	chr6:116515182-116515450	rs881864:T:C	1	peak289265
peak184869	chr6:118993411-118994340	rs9401113:T:G	peak289548	chr6:118993438-118994295	rs57100274:T:C	1	peak289548
peak184871	chr6:119034692-119035877	rs9387629:T:C	peak289551	chr6:119034855-119035325	rs9387629:T:C	1	peak289551,peak289552
peak184876	chr6:119096048-119096376	rs9374779:T:A	peak289560	chr6:119096082-119096351	rs9374779:T:A	1	peak289560
peak184939	chr6:119501735-119502541	rs6913419:C:G	peak289655	chr6:119501770-119502451	rs6913419:C:G	1	peak289655
peak18497	chr1:231349658-231350144	rs2250749:C:G	peak27985	chr1:231349822-231350096	rs2250749:C:G	1	peak27985
peak185215	chr6:125058385-125058909	rs503819:C:T	peak290044	chr6:125058633-125058893	rs503819:C:T	1	peak290044
peak185222	chr6:125164681-125165069	rs566358:C:T	peak290055	chr6:125164742-125165030	rs566358:C:T	1	peak290055
peak185227	chr6:125184147-125184648	rs3799765:T:C	peak290060	chr6:125184349-125184612	rs62432189:A:C	1	peak290060
peak185305	chr6:125844826-125845926	rs6922416:C:T	peak290165	chr6:125845541-125845849	rs6922416:C:T	1	peak290165
peak185555	chr6:129475461-129476449	rs7741996:C:T	peak290527	chr6:129475534-129476227	rs10534364:GCTGA:G	0.941	peak290527
peak185825	chr6:131992592-131993022	rs233921:C:T	peak290877	chr6:131992638-131992954	rs233921:C:T	1	peak290877
peak185872	chr6:132606953-132608528	rs75339567:T:C	peak290938	chr6:132607603-132608187	rs75339567:T:C	1	peak290938
peak185895	chr6:132733830-132734172	rs6942306:C:A	peak290968	chr6:132733866-132734130	rs6942306:C:A	1	peak290968
peak186037	chr6:134380305-134380840	rs9399094:A:G	peak291162	chr6:134380336-134380752	rs9399094:A:G	1	peak291162
peak186108	chr6:134881929-134883309	rs9389237:T:C	peak291252	chr6:134881949-134882771	rs9389237:T:C	1	peak291252
peak18614	chr1:232634164-232634494	rs10910583:T:C	peak28166	chr1:232634211-232634455	rs10910583:T:C	1	peak28166
peak186380	chr6:137377092-137378400	rs999553:G:A	peak291609	chr6:137377326-137377960	rs999553:G:A	1	peak291609,peak291610
peak186387	chr6:137465410-137466130	rs13205934:C:T	peak291618	chr6:137465452-137465992	rs13205934:C:T	1	peak291618
peak186475	chr6:138267927-138268813	rs203147:G:A	peak291734	chr6:138267973-138268333	rs203147:G:A	1	peak291734,peak291735
peak186707	chr6:139973742-139974550	rs1361248:A:G	peak292026	chr6:139973985-139974329	rs1361248:A:G	1	peak292026
peak186999	chr6:143595386-143595999	rs9386039:A:T	peak292442	chr6:143595714-143595985	rs9386039:A:T	1	peak292442
peak187135	chr6:144696002-144697129	rs1534440:G:A	peak292609	chr6:144696047-144696286	rs1534440:G:A	1	peak292609
peak187174	chr6:145076085-145076979	rs501684:G:T	peak292655	chr6:145076138-145076736	rs608041:A:G	0.839	peak292655
peak187266	chr6:146868332-146869323	rs9390434:T:C	peak292793	chr6:146868662-146869206	rs9390434:T:C	1	peak292793
peak187308	chr6:147588472-147588851	rs9377060:G:A	peak292862	chr6:147588495-147588820	rs56347816:T:G	0.956	peak292862
peak18734	chr1:234262397-234263170	rs12407945:C:T	peak28352	chr1:234262585-234263102	rs12407945:C:T	1	peak28352
peak187362	chr6:148381256-148381982	rs55857426:A:C	peak292933	chr6:148381551-148381880	rs55857426:A:C	1	peak292933
peak187384	chr6:148451582-148452091	rs7341203:C:T	peak292964	chr6:148451740-148452067	rs9377136:G:A	0.862	peak292964
peak18739	chr1:234314968-234315633	rs611676:A:G	peak28358	chr1:234315204-234315586	rs611676:A:G	1	peak28358
peak18740	chr1:234320545-234321185	rs594646:T:A	peak28360	chr1:234320603-234320915	rs474208:A:G	0.995	peak28360
peak187409	chr6:148593052-148594180	rs62434593:A:G	peak293001	chr6:148593080-148593575	rs62434593:A:G	1	peak293001
peak187457	chr6:149169039-149171315	rs4243487:T:C	peak293079	chr6:149169838-149170423	rs4243488:G:A	0.992	peak293079,peak293080
peak187528	chr6:149767343-149768401	rs62441303:A:G	peak293166	chr6:149767576-149768076	rs62441303:A:G	1	peak293166
peak187587	chr6:150376992-150378058	rs7772485:G:A	peak293277	chr6:150377170-150377623	rs1339109:C:A	0.993	peak293277
peak187622	chr6:150592377-150593056	rs9372079:T:C	peak293324	chr6:150592576-150593036	rs6939290:T:G	0.993	peak293324
peak187696	chr6:151066989-151068946	rs10457869:C:T	peak293416	chr6:151067102-151068623	rs12211869:G:T	0.861	peak293416
peak187747	chr6:151493437-151495054	rs2859824:C:A	peak293495	chr6:151493658-151494928	rs2859823:G:A	1	peak293495
peak187776	chr6:151679014-151679555	rs6905582:G:A	peak293532	chr6:151679146-151679517	rs6905582:G:A	1	peak293532
peak18782	chr1:234599070-234599360	rs111315083:T:G	peak28410	chr1:234599140-234599357	rs10910476:C:T	0.856	peak28410
peak187847	chr6:152313807-152315054	rs9371583:T:C	peak293642	chr6:152314240-152314939	rs9371248:A:G	0.999	peak293642
peak187855	chr6:152380190-152381937	rs214959:G:A	peak293650	chr6:152380973-152381865	rs214959:G:A	1	peak293650
peak187867	chr6:152624976-152625616	rs1631457:C:T	peak293662	chr6:152625205-152625511	rs1631457:C:T	1	peak293662
peak188086	chr6:155141933-155143807	rs6907183:G:A	peak293973	chr6:155142920-155143198	rs9384290:A:T	0.995	peak293973,peak293974
peak188122	chr6:155693606-155694851	rs1553118:T:C	peak294032	chr6:155693704-155694612	rs1553118:T:C	1	peak294032
peak188573	chr6:159311248-159312053	rs34147307:G:A	peak294711	chr6:159311568-159311944	rs34147307:G:A	1	peak294711
peak188681	chr6:160139570-160140161	rs628031:A:G	peak294902	chr6:160139592-160140069	rs628031:A:G	1	peak294902
peak188713	chr6:160386604-160387558	rs420038:C:T	peak294949	chr6:160386668-160387443	rs420038:C:T	1	peak294949
peak188906	chr6:162626642-162627774	rs2846517:C:T	peak295278	chr6:162627377-162627698	rs2849509:T:C	0.997	peak295278
peak188946	chr6:163264261-163265218	rs12526405:G:A	peak295362	chr6:163264291-163265029	rs13209061:T:C	0.927	peak295362
peak18898	chr1:235297433-235297990	rs11581314:C:T	peak28583	chr1:235297521-235297845	rs11581782:C:T	0.999	peak28583
peak189008	chr6:163598988-163600221	rs9346964:G:A	peak295443	chr6:163599051-163599527	rs9346964:G:A	1	peak295443,peak295444
peak189013	chr6:163678952-163680209	rs2104232:A:G	peak295462	chr6:163678987-163679580	rs7757830:A:C	0.896	peak295462,peak295463
peak189049	chr6:164039821-164040556	rs689056:T:C	peak295532	chr6:164039886-164040401	rs34024328:TA:T	0.832	peak295532
peak189189	chr6:166253883-166254247	rs4709108:G:T	peak295801	chr6:166253921-166254180	rs4709108:G:T	1	peak295801
peak189271	chr6:166766792-166767906	rs9457203:T:C	peak295946	chr6:166766814-166767126	rs9457203:T:C	1	peak295946,peak295947,peak295948
peak189273	chr6:166782358-166783004	rs845642:G:A	peak295951	chr6:166782464-166782916	rs845642:G:A	1	peak295951
peak189329	chr6:167301797-167302560	rs2981973:C:T	peak296053	chr6:167302133-167302415	rs2981973:C:T	1	peak296053
peak189686	chr6:170369271-170369826	rs66805711:T:A	peak296892	chr6:170369472-170369752	rs9460126:A:C	0.845	peak296892
peak189691	chr6:170398727-170399288	rs10946259:T:C	peak296899	chr6:170398812-170399134	rs10946259:T:C	1	peak296899
peak18970	chr1:236011573-236012473	rs2031486:T:C	peak28687	chr1:236011623-236012316	rs2031486:T:C	1	peak28687
peak189729	chr7:118926-120980	rs4244217:G:A	peak296957	chr7:120646-120947	rs4244214:T:A	0.997	peak296957
peak189743	chr7:214353-215252	rs34407775:C:T	peak296984	chr7:214405-215156	rs34407775:C:T	1	peak296984
peak189744	chr7:218050-219097	rs73040196:G:A	peak296985	chr7:218313-218865	rs73040196:G:A	1	peak296985
peak189825	chr7:732020-732828	rs4072597:G:A	peak297164	chr7:732118-732587	rs4072597:G:A	1	peak297164
peak189858	chr7:909382-910469	rs2885735:A:G	peak297230	chr7:909414-910363	rs2885735:A:G	1	peak297230
peak189907	chr7:1169298-1170401	rs10252404:C:A	peak297307	chr7:1169501-1170231	rs10252404:C:A	1	peak297307
peak189945	chr7:1555083-1556617	rs6463928:A:G	peak297441	chr7:1555276-1556610	rs6463928:A:G	1	peak297441
peak189972	chr7:1811536-1813116	rs4385369:G:A	peak297511	chr7:1811918-1812678	rs4385369:G:A	1	peak297511
peak19012	chr1:236288137-236288468	rs557205:C:A	peak28746	chr1:236288175-236288457	rs557205:C:A	1	peak28746
peak190183	chr7:3103596-3104644	rs10236373:A:T	peak297891	chr7:3104051-3104396	rs10236373:A:T	1	peak297890,peak297891
peak190209	chr7:3649644-3650407	rs2614956:T:G	peak297929	chr7:3649743-3650351	rs2614956:T:G	1	peak297929
peak190237	chr7:4151903-4152708	rs666562:C:T	peak298016	chr7:4151942-4152446	rs611712:C:G	0.835	peak298016
peak190246	chr7:4204578-4205168	rs4460273:G:C	peak298033	chr7:4204698-4205066	rs4460273:G:C	1	peak298033
peak190618	chr7:8140886-8141669	rs6972885:T:C	peak298649	chr7:8141034-8141537	rs13239720:G:A	0.997	peak298649
peak190633	chr7:8239464-8240729	rs10243615:C:G	peak298666	chr7:8239495-8240520	rs10250445:A:G	0.952	peak298666
peak190638	chr7:8290723-8291408	rs4725078:G:A	peak298672	chr7:8290931-8291300	rs4725078:G:A	1	peak298672
peak190697	chr7:9889129-9890897	rs2971094:C:G	peak298773	chr7:9889363-9890095	rs2971094:C:G	1	peak298773
peak190802	chr7:11565797-11566266	rs10279701:T:C	peak298948	chr7:11565980-11566281	rs10234091:A:G	0.949	peak298948
peak191008	chr7:14714041-14714827	rs9784967:G:T	peak299217	chr7:14714083-14714780	rs9784967:G:T	1	peak299217
peak191107	chr7:16066973-16068112	rs12671580:A:G	peak299360	chr7:16067048-16067566	rs12671580:A:G	1	peak299360
peak191115	chr7:16263960-16265014	rs73060585:T:G	peak299373	chr7:16264093-16264855	rs56150063:A:G	0.987	peak299373
peak191283	chr7:17679903-17681516	rs77556056:G:A	peak299613	chr7:17680940-17681378	rs77556056:G:A	1	peak299613
peak191288	chr7:17722638-17723580	rs2537568:A:G	peak299621	chr7:17723135-17723442	rs2537568:A:G	1	peak299621
peak19151	chr1:238324337-238324884	rs259595:C:A	peak28962	chr1:238324531-238324826	rs259595:C:A	1	peak28962
peak191564	chr7:22146980-22147731	rs6461639:T:C	peak300006	chr7:22147133-22147478	rs6461639:T:C	1	peak300006
peak191703	chr7:23390401-23391877	rs17797853:G:A	peak300192	chr7:23391072-23391735	rs17797853:G:A	1	peak300192
peak191719	chr7:23544750-23545237	rs11767307:C:G	peak300214	chr7:23544874-23545224	rs11767307:C:G	1	peak300214
peak191723	chr7:23595338-23595662	rs35121828:G:A	peak300219	chr7:23595385-23595619	rs35121828:G:A	1	peak300219
peak191835	chr7:25249603-25250539	rs67371712:T:C	peak300397	chr7:25249797-25250420	rs67371712:T:C	1	peak300397
peak191887	chr7:25982660-25983068	rs7780562:A:C	peak300476	chr7:25982673-25983008	rs7780562:A:C	1	peak300476
peak192099	chr7:28237282-28237755	rs2158799:C:G	peak300790	chr7:28237361-28237639	rs2158799:C:G	1	peak300790
peak192157	chr7:29091091-29092024	rs2067018:G:C	peak300865	chr7:29091249-29091615	rs2067018:G:C	1	peak300865
peak192208	chr7:29331816-29332842	rs55714565:A:G	peak300930	chr7:29332420-29332692	rs70980528:CCAGGGTAAA:C	0.996	peak300930
peak192276	chr7:30124437-30124794	rs2391821:A:G	peak301039	chr7:30124475-30124755	rs2391821:A:G	1	peak301039
peak19235	chr1:239912239-239913630	rs10495449:A:G	peak29086	chr1:239912501-239912938	rs10495449:A:G	1	peak29086,peak29087
peak192439	chr7:31688178-31688798	rs12666349:T:C	peak301343	chr7:31688418-31688695	rs12666349:T:C	1	peak301343
peak192653	chr7:34747876-34748959	rs324398:G:C	peak301672	chr7:34747921-34748836	rs324398:G:C	1	peak301672
peak192773	chr7:36151956-36153909	rs10279011:C:T	peak301844	chr7:36152046-36153702	rs28462277:T:C	0.999	peak301844
peak192803	chr7:36300952-36301350	rs3735402:T:G	peak301888	chr7:36301050-36301319	rs3735402:T:G	1	peak301888
peak192811	chr7:36460561-36461417	rs7784898:T:G	peak301898	chr7:36460697-36461358	rs10715204:AG:A	1	peak301898
peak192812	chr7:36462594-36463265	rs58282110:G:T	peak301899	chr7:36462686-36463165	rs58282110:G:T	1	peak301899
peak192942	chr7:37414186-37415471	rs1618858:T:C	peak302075	chr7:37414358-37414964	rs1618858:T:C	1	peak302075
peak192944	chr7:37416758-37417420	rs10228152:G:A	peak302077	chr7:37416911-37417395	rs28708955:T:C	0.996	peak302077
peak192989	chr7:38070711-38070987	rs6956946:T:G	peak302135	chr7:38070716-38070966	rs1403988:A:G	1	peak302135
peak193021	chr7:38345448-38346103	rs12532845:G:A	peak302169	chr7:38345590-38346010	rs12532845:G:A	1	peak302169
peak193055	chr7:38702899-38703641	rs34765437:A:G	peak302221	chr7:38703088-38703573	rs67594222:C:T	0.961	peak302221
peak193122	chr7:39741909-39742807	rs62453003:T:G	peak302322	chr7:39741988-39742588	rs62453003:T:G	1	peak302322
peak193155	chr7:40175304-40176493	rs887445:A:T	peak302368	chr7:40175674-40176384	rs1881683:G:T	0.972	peak302368
peak193157	chr7:40187579-40187836	rs3966459:G:A	peak302370	chr7:40187586-40187836	rs9639824:G:A	0.971	peak302370
peak193233	chr7:41437205-41438157	rs273113:C:T	peak302488	chr7:41437232-41438144	rs273113:C:T	1	peak302488
peak193247	chr7:41584598-41585193	rs12701922:C:T	peak302507	chr7:41584799-41585104	rs12701922:C:T	1	peak302507
peak193381	chr7:43658680-43660097	rs10081211:A:T	peak302727	chr7:43659028-43659790	rs10081357:T:C	1	peak302727
peak193382	chr7:43667023-43667376	rs6463201:A:T	peak302728	chr7:43667036-43667338	rs6463201:A:T	1	peak302728
peak19361	chr1:241927018-241927771	rs112288712:T:C	peak29312	chr1:241927336-241927727	rs113147810:C:T	0.997	peak29312
peak193649	chr7:45920635-45921750	rs2854746:G:C	peak303205	chr7:45920636-45921641	rs2854746:G:C	1	peak303205
peak193665	chr7:46024224-46025056	rs1525830:C:T	peak303226	chr7:46024328-46024888	rs1525830:C:T	1	peak303226
peak193671	chr7:46129844-46130166	rs12536129:G:A	peak303235	chr7:46129880-46130145	rs12536129:G:A	1	peak303235
peak193679	chr7:46157455-46157737	rs11770622:C:T	peak303245	chr7:46157501-46157732	rs11770622:C:T	1	peak303245
peak193703	chr7:46603302-46604732	rs17172730:G:A	peak303295	chr7:46604171-46604475	rs17172730:G:A	1	peak303294,peak303295
peak193818	chr7:47526278-47526916	rs334524:A:T	peak303500	chr7:47526369-47526836	rs334524:A:T	1	peak303500
peak193831	chr7:47571086-47572401	rs55919506:C:T	peak303516	chr7:47571245-47572383	rs17659059:T:C	0.991	peak303516
peak193927	chr7:48161434-48161792	rs62447156:A:G	peak303659	chr7:48161493-48161719	rs73694364:C:T	0.999	peak303659
peak194110	chr7:50665130-50665741	rs2715093:T:C	peak303970	chr7:50665166-50665704	rs2715093:T:C	1	peak303970
peak194173	chr7:51077832-51078346	rs56091846:C:T	peak304086	chr7:51077990-51078296	rs56091846:C:T	1	peak304086
peak194198	chr7:51241758-51242666	rs2011611:T:C	peak304136	chr7:51241927-51242603	rs758270:T:C	0.954	peak304136
peak194384	chr7:54663859-54665317	rs595452:G:A	peak304464	chr7:54664025-54664865	rs595452:G:A	1	peak304464
peak194710	chr7:65020752-65022648	rs4718187:G:A	peak305029	chr7:65022304-65022537	rs4718187:G:A	1	peak305027,peak305028,peak305029
peak194866	chr7:66456288-66456827	rs1833495:T:C	peak305224	chr7:66456459-66456799	rs6945019:C:G	0.999	peak305224
peak194928	chr7:67163283-67163796	rs3864345:A:G	peak305327	chr7:67163350-67163616	rs3864346:C:T	1	peak305327
peak194988	chr7:68873437-68874169	rs12334191:C:T	peak305429	chr7:68873546-68874005	rs12333502:T:G	0.999	peak305429
peak195145	chr7:70765327-70766467	rs6959436:G:A	peak305634	chr7:70765704-70766132	rs6959436:G:A	1	peak305634
peak195157	chr7:70829004-70831266	rs62459597:G:A	peak305651	chr7:70829751-70830222	rs62459597:G:A	1	peak305651,peak305652,peak305653
peak195283	chr7:73652428-73653334	rs6956862:T:G	peak305892	chr7:73652475-73653138	rs6956862:T:G	1	peak305892
peak195492	chr7:75842259-75843456	rs10954667:A:T	peak306246	chr7:75842476-75843299	rs10954667:A:T	1	peak306246
peak195555	chr7:76142930-76143213	rs6951943:A:G	peak306331	chr7:76142919-76143161	rs6975385:C:T	0.992	peak306331
peak195614	chr7:76515928-76516365	rs1636632:A:G	peak306409	chr7:76515960-76516272	rs1636632:A:G	1	peak306409
peak195622	chr7:76600175-76601126	rs10258554:A:G	peak306418	chr7:76600663-76600998	rs10265902:T:C	0.985	peak306418
peak195682	chr7:77396377-77397676	rs2286156:G:A	peak306478	chr7:77396989-77397244	rs2286156:G:A	1	peak306478
peak19573	chr1:244639461-244639944	rs905251:T:G	peak29609	chr1:244639553-244639932	rs905251:T:G	1	peak29609
peak195755	chr7:78040050-78040883	rs6465970:G:A	peak306574	chr7:78040213-78040717	rs6465970:G:A	1	peak306574
peak195784	chr7:78850152-78850460	rs1207820:C:T	peak306632	chr7:78850175-78850446	rs552822:C:T	0.996	peak306632
peak195800	chr7:79307943-79308716	rs16886524:G:A	peak306660	chr7:79308146-79308657	rs56038725:T:TG	0.995	peak306660
peak195802	chr7:79341766-79342404	rs7800314:T:C	peak306662	chr7:79341948-79342209	rs10263112:T:C	0.994	peak306662
peak195826	chr7:79741732-79742625	rs10251224:A:G	peak306696	chr7:79741770-79742020	rs34616646:TG:T	0.998	peak306696
peak19584	chr1:244757211-244757962	rs12144627:C:G	peak29621	chr1:244757342-244757730	rs12144627:C:G	1	peak29621
peak195862	chr7:80213862-80214173	rs56387878:C:A	peak306743	chr7:80213874-80214156	rs56387878:C:A	1	peak306743
peak195884	chr7:80401663-80402342	rs562467:A:G	peak306773	chr7:80401712-80402056	rs573316:G:A	0.991	peak306773
peak1959	chr1:18953685-18954072	rs6694507:A:G	peak3764	chr1:18953740-18954030	rs6694507:A:G	1	peak3764
peak196137	chr7:85528866-85529792	rs73201589:G:A	peak307106	chr7:85529037-85529634	rs4727104:T:C	0.96	peak307106
peak196693	chr7:94392086-94392340	rs3763469:T:C	peak307926	chr7:94392108-94392336	rs3763469:T:C	1	peak307926
peak196733	chr7:95317616-95319070	rs854562:C:T	peak308003	chr7:95317649-95318304	rs854562:C:T	1	peak308003,peak308004
peak196759	chr7:95440103-95441719	rs43042:G:A	peak308042	chr7:95440230-95441394	rs43042:G:A	1	peak308042
peak196874	chr7:96585191-96586142	rs34898775:T:G	peak308190	chr7:96585272-96586042	rs7790674:G:A	0.991	peak308190
peak196888	chr7:96953666-96954243	rs2686920:G:A	peak308219	chr7:96953698-96954073	rs2686920:G:A	1	peak308219
peak19704	chr1:245990633-245991001	rs10924427:T:C	peak29842	chr1:245990643-245990987	rs4512612:G:A	0.999	peak29842
peak19717	chr1:246155860-246156310	rs4654092:A:G	peak29859	chr1:246155936-246156248	rs4654092:A:G	1	peak29859
peak19723	chr1:246210804-246211354	rs4654219:A:G	peak29865	chr1:246210825-246211122	rs4654219:A:G	1	peak29865
peak197290	chr7:100803367-100804063	rs221005:A:G	peak308891	chr7:100803418-100803875	rs221005:A:G	1	peak308891
peak197321	chr7:100990860-100993054	rs4370452:C:A	peak308928	chr7:100991725-100992173	rs4370452:C:A	1	peak308928
peak19736	chr1:246374002-246374914	rs6674691:C:T	peak29881	chr1:246374195-246374834	rs6674691:C:T	1	peak29881
peak197377	chr7:101362615-101364466	rs4729693:C:T	peak309007	chr7:101362856-101364285	rs10261809:A:G	0.999	peak309007
peak19746	chr1:246549340-246551212	rs4654289:G:C	peak29896	chr1:246550511-246550850	rs4654289:G:C	1	peak29895,peak29896,peak29897
peak19771	chr1:246699094-246699512	rs10924809:C:T	peak29929	chr1:246699105-246699490	rs10924809:C:T	1	peak29929
peak197752	chr7:106047229-106047623	rs7795448:G:A	peak309572	chr7:106047228-106047545	rs7795448:G:A	1	peak309572
peak197951	chr7:107971636-107972639	rs1544474:A:G	peak309841	chr7:107971669-107972509	rs1544474:A:G	1	peak309841
peak198038	chr7:109229674-109231029	rs7455123:C:A	peak309980	chr7:109230288-109230547	rs72470620:AATTAT:A	0.999	peak309980,peak309981
peak198093	chr7:111067189-111067750	rs12705755:G:C	peak310086	chr7:111067357-111067712	rs12668074:T:C	0.996	peak310086
peak198457	chr7:116305535-116306699	rs11765158:G:T	peak310599	chr7:116305565-116305877	rs6952197:A:C	0.999	peak310599,peak310600
peak198814	chr7:121304915-121305482	rs1547959:T:C	peak311125	chr7:121305121-121305466	rs1547960:A:G	0.999	peak311125
peak198874	chr7:122225978-122226305	rs55818404:C:T	peak311212	chr7:122225991-122226271	rs59128181:AC:A	1	peak311212
peak199006	chr7:124489092-124490488	rs60598740:G:A	peak311403	chr7:124489123-124490324	rs60598740:G:A	1	peak311403
peak199156	chr7:127751208-127752278	rs1348103:A:G	peak311629	chr7:127751519-127752049	rs1348103:A:G	1	peak311629
peak199170	chr7:127821137-127821598	rs325445:C:A	peak311649	chr7:127821200-127821547	chr7:127821717:TA:T:TA:T	0.973	peak311649
peak199234	chr7:128202764-128203592	rs4731415:G:A	peak311750	chr7:128202961-128203552	rs4731415:G:A	1	peak311750
peak199271	chr7:128461269-128461701	rs11765023:G:A	peak311810	chr7:128461444-128461696	rs11765023:G:A	1	peak311810
peak199281	chr7:128633789-128634492	rs9768325:G:A	peak311820	chr7:128633965-128634325	rs9768325:G:A	1	peak311820
peak199453	chr7:130368992-130369731	rs17164872:G:T	peak312075	chr7:130369071-130369679	rs17164872:G:T	1	peak312075
peak199535	chr7:131061276-131062371	rs13228326:T:C	peak312193	chr7:131061587-131062199	rs71584829:C:T	0.868	peak312193
peak199582	chr7:131497848-131498775	rs3847112:G:T	peak312251	chr7:131498187-131498690	rs3847112:G:T	1	peak312251
peak199756	chr7:134041885-134043017	rs6950383:T:C	peak312575	chr7:134041943-134042180	rs6967856:C:T	0.998	peak312575,peak312576
peak199783	chr7:134355687-134356952	rs1558995:C:T	peak312614	chr7:134355804-134356605	rs6946578:G:A	0.998	peak312614
peak199892	chr7:135253911-135254877	rs6943567:C:T	peak312783	chr7:135253988-135254732	rs6943567:C:T	1	peak312783
peak200041	chr7:137717731-137718216	rs3800636:T:C	peak313010	chr7:137717833-137718147	rs3800636:T:C	1	peak313010
peak200168	chr7:138890494-138891449	rs10262284:T:C	peak313205	chr7:138890606-138891425	rs10262284:T:C	1	peak313205
peak200338	chr7:140313893-140314909	rs34473504:G:A	peak313465	chr7:140314582-140314873	rs12703742:C:T	0.999	peak313465
peak200359	chr7:140540135-140540957	rs4236489:G:A	peak313495	chr7:140540217-140540801	rs4236489:G:A	1	peak313495
peak200360	chr7:140541332-140542746	rs10952732:T:C	peak313497	chr7:140542341-140542703	rs7800558:T:C	0.831	peak313497
peak200361	chr7:140544424-140544925	rs2293177:C:T	peak313498	chr7:140544579-140544894	rs2293177:C:T	1	peak313498
peak20052	chr10:788723-789821	rs72776479:C:T	peak30366	chr10:788895-789816	rs11253444:A:G	0.998	peak30366
peak200668	chr7:143906884-143907593	rs4726653:C:G	peak313940	chr7:143906915-143907266	rs4726653:C:G	1	peak313940
peak200713	chr7:144776466-144776978	rs10259099:C:T	peak314008	chr7:144776496-144776783	rs10259099:C:T	1	peak314008
peak20078	chr10:1015718-1016265	rs2306406:A:G	peak30412	chr10:1015801-1016186	rs2306406:A:G	1	peak30412
peak200817	chr7:148078051-148078803	rs6961656:T:C	peak314170	chr7:148078106-148078473	rs6961656:T:C	1	peak314170
peak200843	chr7:148380709-148381795	rs1730413:C:T	peak314209	chr7:148380781-148381542	rs1637851:C:T	1	peak314209
peak200860	chr7:148556817-148558087	rs12535350:A:T	peak314232	chr7:148556867-148557589	rs12535350:A:T	1	peak314232
peak201070	chr7:150803242-150803653	rs741066:C:T	peak314572	chr7:150803288-150803594	rs741066:C:T	1	peak314572
peak201074	chr7:150825920-150826749	rs10452847:A:T	peak314576	chr7:150825972-150826515	rs10452847:A:T	1	peak314576
peak20110	chr10:1240321-1240804	rs3793739:C:A	peak30475	chr10:1240359-1240770	rs3793739:C:A	1	peak30475
peak201225	chr7:151806298-151806644	rs55845365:C:G	peak314839	chr7:151806364-151806629	rs55845365:C:G	1	peak314839
peak201346	chr7:152905813-152906300	rs10245498:T:C	peak315003	chr7:152906029-152906271	rs10245498:T:C	1	peak315003
peak201444	chr7:155189084-155189794	rs11978131:C:A	peak315288	chr7:155189164-155189532	rs58225134:C:T	0.999	peak315288
peak201502	chr7:155594916-155595490	rs55918200:C:T	peak315425	chr7:155594932-155595416	rs55918200:C:T	1	peak315425
peak201543	chr7:155799488-155799880	rs2239966:C:T	peak315485	chr7:155799549-155799861	rs2239966:C:T	1	peak315485
peak201565	chr7:155961102-155962665	rs7807731:C:T	peak315533	chr7:155962291-155962632	rs10255425:T:C	0.99	peak315532,peak315533
peak201618	chr7:156607451-156609440	rs66621757:G:C	peak315691	chr7:156607492-156608426	rs66621757:G:C	1	peak315691
peak201620	chr7:156615435-156615966	rs28669137:T:C	peak315695	chr7:156615493-156615866	rs28669137:T:C	1	peak315695
peak201644	chr7:156907306-156908312	rs11770664:C:G	peak315727	chr7:156907672-156908129	rs11770664:C:G	1	peak315727
peak201645	chr7:156908407-156909337	rs56363462:T:C	peak315728	chr7:156908854-156909288	rs28546969:T:C	1	peak315728
peak201662	chr7:157200049-157201186	rs2366214:A:G	peak315770	chr7:157200583-157200928	rs10085650:T:C	0.995	peak315770
peak201964	chr8:487946-489432	rs10098619:A:G	peak316457	chr8:488540-489033	rs10098619:A:G	1	peak316457
peak202028	chr8:979517-980865	rs10099591:G:A	peak316595	chr8:980244-980754	rs10099591:G:A	1	peak316595
peak202177	chr8:2146130-2146926	rs67489990:G:T	peak316959	chr8:2146185-2146903	rs76912954:A:G	0.999	peak316959
peak202178	chr8:2151966-2152543	rs28862980:T:C	peak316960	chr8:2152046-2152413	rs13271873:C:G	0.993	peak316960
peak202179	chr8:2152757-2153176	rs13271873:C:G	peak316961	chr8:2152854-2153165	rs62501403:C:T	0.996	peak316961
peak202316	chr8:3987122-3988696	rs2554538:A:G	peak317188	chr8:3987155-3988650	rs2554538:A:G	1	peak317188
peak202372	chr8:4935045-4935507	rs35560665:A:G	peak317278	chr8:4935192-4935467	rs35253816:A:G	1	peak317278
peak202373	chr8:4945651-4946579	rs13263146:G:C	peak317279	chr8:4945726-4946199	rs13263146:G:C	1	peak317279,peak317280
peak202394	chr8:5259659-5260945	rs75996570:T:C	peak317319	chr8:5260024-5260592	rs75996570:T:C	1	peak317319
peak202409	chr8:5619215-5620055	rs78295990:G:A	peak317347	chr8:5619471-5619873	rs78295990:G:A	1	peak317347
peak202440	chr8:6258388-6258810	rs73190801:G:C	peak317403	chr8:6258518-6258805	rs73190801:G:C	1	peak317403
peak202511	chr8:6840478-6841689	rs4840639:T:A	peak317533	chr8:6840571-6841603	rs4840639:T:A	1	peak317533
peak202517	chr8:6875462-6875922	rs2977772:G:A	peak317543	chr8:6875500-6875870	rs10543366:AAAG:A	0.999	peak317543
peak202712	chr8:9080290-9080919	rs77525819:C:G	peak317780	chr8:9080430-9080851	rs17155181:T:C	0.998	peak317780
peak202739	chr8:9247791-9249418	rs17149626:G:A	peak317811	chr8:9248459-9249228	rs17149626:G:A	1	peak317811
peak202748	chr8:9324366-9326230	rs4841132:A:G	peak317824	chr8:9325707-9326205	rs4841132:A:G	1	peak317824
peak202760	chr8:9419197-9419874	rs10107959:T:C	peak317849	chr8:9419226-9419732	rs10107932:T:A	0.994	peak317849
peak202777	chr8:9653761-9654274	rs11249934:T:C	peak317877	chr8:9654005-9654249	rs11249934:T:C	1	peak317877
peak202796	chr8:9961145-9961922	rs593085:T:A	peak317910	chr8:9961452-9961819	rs1915557:A:G	0.962	peak317910
peak202814	chr8:10180749-10181126	rs11786117:A:G	peak317939	chr8:10180761-10181074	rs11786117:A:G	1	peak317939
peak202854	chr8:10582343-10582865	rs34610931:G:T	peak318019	chr8:10582585-10582845	rs34610931:G:T	1	peak318019
peak202878	chr8:10713251-10714289	rs4484649:C:A	peak318066	chr8:10713381-10713680	rs4484649:C:A	1	peak318066,peak318067
peak202918	chr8:11261905-11262581	rs2736378:G:A	peak318161	chr8:11261989-11262390	rs10503418:C:T	0.996	peak318161
peak202919	chr8:11264485-11265536	rs1435278:G:T	peak318162	chr8:11264839-11265412	rs1435278:G:T	1	peak318162
peak20293	chr10:3330658-3331356	rs1572539:G:C	peak30918	chr10:3330737-3331059	rs1572539:G:C	1	peak30918
peak203026	chr8:11884488-11885329	rs966785:C:G	peak318337	chr8:11884822-11885224	rs966785:C:G	1	peak318337
peak203030	chr8:11891586-11892402	rs1736130:C:G	peak318343	chr8:11892039-11892343	rs13264683:C:T	0.997	peak318343
peak203112	chr8:12976728-12977328	rs2460904:G:A	peak318457	chr8:12976749-12977060	rs2460904:G:A	1	peak318457
peak203114	chr8:12993071-12993875	rs11204005:A:G	peak318460	chr8:12993471-12993811	rs11204005:A:G	1	peak318460
peak203182	chr8:13346079-13347000	rs62493430:C:T	peak318550	chr8:13346392-13346957	rs12678977:C:T	0.976	peak318550
peak203191	chr8:13372326-13373143	rs1631936:C:T	peak318561	chr8:13372403-13372753	rs1729167:T:C	0.876	peak318561
peak203399	chr8:17608000-17609180	rs2517198:C:T	peak318877	chr8:17608112-17608616	rs2517196:C:T	0.992	peak318877
peak203413	chr8:17674562-17675634	rs34105101:G:T	peak318896	chr8:17674676-17675396	rs2269698:T:C	0.854	peak318896
peak203514	chr8:18640797-18641458	rs10108702:G:A	peak319059	chr8:18640941-18641351	rs13253691:T:C	0.991	peak319059
peak203522	chr8:18677248-18678089	rs721562:T:G	peak319069	chr8:18677342-18678021	rs721562:T:G	1	peak319069
peak203541	chr8:18834351-18834783	rs747555:A:G	peak319092	chr8:18834362-18834741	rs747555:A:G	1	peak319092
peak203727	chr8:20570338-20571101	rs7833773:C:T	peak319366	chr8:20570391-20570995	rs7833773:C:T	1	peak319366
peak203814	chr8:21893087-21893795	rs13266920:C:T	peak319546	chr8:21893203-21893650	rs17500142:G:A	1	peak319546
peak203826	chr8:21944572-21944933	rs11135742:A:T	peak319559	chr8:21944634-21944896	rs4311656:T:G	0.998	peak319559
peak204057	chr8:23506417-23507446	rs73226478:G:A	peak319907	chr8:23506769-23507170	rs73226478:G:A	1	peak319907
peak204203	chr8:25359859-25360254	rs17053452:T:G	peak320101	chr8:25359897-25360239	rs17053452:T:G	1	peak320101
peak204259	chr8:26265287-26266567	rs17055069:C:T	peak320189	chr8:26265512-26266357	rs17055069:C:T	1	peak320189
peak204411	chr8:27398609-27399125	rs17448278:G:A	peak320415	chr8:27398670-27399008	rs11267627:AGCAGCTCTCCTGCAGCCTC:A	0.994	peak320415
peak204412	chr8:27399476-27400957	rs2322718:T:G	peak320416	chr8:27399741-27400305	rs2322718:T:G	1	peak320416,peak320417
peak204446	chr8:27600356-27600805	rs9331930:T:G	peak320480	chr8:27600420-27600783	rs9331931:G:C	0.978	peak320480
peak204473	chr8:27856439-27856806	rs898468:A:G	peak320515	chr8:27856473-27856806	rs11327253:AC:A	0.992	peak320515
peak204558	chr8:28633362-28634361	rs11136051:C:T	peak320649	chr8:28633412-28634069	rs12235009:C:T	0.999	peak320649
peak204618	chr8:29125245-29127452	rs3763565:A:G	peak320732	chr8:29127141-29127412	rs3763565:A:G	1	peak320732
peak20465	chr10:4703952-4704627	rs10904322:C:A	peak31155	chr10:4704078-4704477	rs10904322:C:A	1	peak31155
peak204955	chr8:32753030-32753751	rs28529748:A:C	peak321196	chr8:32753339-32753694	rs139167058:C:CA	0.976	peak321196
peak204984	chr8:33313798-33315371	rs11987804:G:T	peak321239	chr8:33313925-33314525	rs11985236:T:C	1	peak321239,peak321240
peak205063	chr8:35013601-35014873	rs28625542:G:T	peak321376	chr8:35013696-35014425	rs10090404:T:C	0.996	peak321376,peak321377
peak20519	chr10:5045134-5045531	rs2801914:T:G	peak31230	chr10:5045147-5045469	rs7907104:T:C	1	peak31230
peak205272	chr8:38406441-38407001	rs12677006:C:G	peak321748	chr8:38406488-38406858	rs12677006:C:G	1	peak321748
peak20537	chr10:5160251-5160750	rs12769156:C:G	peak31254	chr10:5160353-5160655	rs12769156:C:G	1	peak31254
peak205418	chr8:40034489-40035431	rs16888662:G:T	peak321969	chr8:40034689-40035255	rs16888662:G:T	1	peak321969
peak205524	chr8:41463167-41463775	rs2042667:C:T	peak322174	chr8:41463433-41463734	rs2042667:C:T	1	peak322174
peak20555	chr10:5261658-5261942	rs9423584:T:G	peak31278	chr10:5261659-5261898	rs9423584:T:G	1	peak31278
peak205578	chr8:41848795-41849404	rs12156316:T:C	peak322265	chr8:41848815-41849072	rs12156316:T:C	1	peak322265
peak20605	chr10:5601384-5602303	rs4747916:T:C	peak31361	chr10:5601498-5602187	rs10906107:T:C	0.998	peak31361
peak20606	chr10:5603621-5604113	rs7917232:C:T	peak31362	chr10:5603790-5604074	rs7098582:C:T	0.995	peak31362
peak206220	chr8:52820007-52821441	rs62501744:A:G	peak323430	chr8:52820466-52820756	rs62501744:A:G	1	peak323429,peak323430
peak206222	chr8:52832109-52832415	rs2360240:A:T	peak323432	chr8:52832139-52832404	rs2360240:A:T	1	peak323432
peak206269	chr8:53609371-53610155	rs13249232:G:A	peak323532	chr8:53609343-53609734	rs112797118:G:A	0.997	peak323532,peak323533
peak206341	chr8:54281017-54282038	rs2594823:A:T	peak323638	chr8:54281299-54281788	rs2594822:T:C	0.999	peak323638
peak206442	chr8:55400835-55401607	rs906168:A:G	peak323809	chr8:55401068-55401589	rs906168:A:G	1	peak323809
peak206470	chr8:55847660-55848344	rs13262073:C:G	peak323855	chr8:55847910-55848182	rs13262073:C:G	1	peak323855
peak206595	chr8:57219154-57219902	rs11783444:A:G	peak324056	chr8:57219148-57219863	rs11784908:T:C	1	peak324056
peak20663	chr10:5976673-5978263	rs36055263:A:G	peak31442	chr10:5976696-5978240	rs8177633:C:G	0.97	peak31442
peak206638	chr8:57702459-57704318	rs7004631:G:A	peak324123	chr8:57703914-57704262	rs7004518:C:T	0.999	peak324123
peak207039	chr8:62102570-62103145	rs4352846:T:G	peak324689	chr8:62102623-62103085	rs10107684:C:T	0.989	peak324689
peak207064	chr8:62863673-62864758	rs11776591:T:C	peak324742	chr8:62863998-62864369	rs11776591:T:C	1	peak324742
peak20767	chr10:6618257-6618737	rs12776084:C:T	peak31590	chr10:6618356-6618658	rs12776084:C:T	1	peak31590
peak207676	chr8:70674396-70675967	rs7001162:G:A	peak325605	chr8:70674570-70674818	rs7001162:G:A	1	peak325605,peak325607,peak325606
peak207678	chr8:70682641-70683302	rs62533067:A:G	peak325609	chr8:70682856-70683254	rs17760385:T:C	0.999	peak325609
peak207838	chr8:73156478-73157730	rs6992484:A:G	peak325853	chr8:73156702-73157496	rs12543962:A:T	0.997	peak325853
peak207843	chr8:73207523-73208389	rs2546235:G:A	peak325859	chr8:73207912-73208367	rs2546235:G:A	1	peak325859
peak20818	chr10:7233224-7234196	rs12411470:C:T	peak31680	chr10:7233321-7234114	rs10905123:T:C	0.99	peak31680
peak208254	chr8:80209485-80210527	rs4740137:T:C	peak326459	chr8:80209627-80210407	rs4740137:T:C	1	peak326459
peak208374	chr8:81130096-81131168	rs10464891:C:A	peak326621	chr8:81130410-81130893	rs10464892:G:A	1	peak326621
peak208571	chr8:85031837-85033016	rs4398911:G:A	peak326900	chr8:85031999-85032514	rs2403052:C:A	0.984	peak326900,peak326901
peak208588	chr8:85260361-85260732	rs6993387:T:A	peak326923	chr8:85260370-85260717	rs6993387:T:A	1	peak326923
peak2086	chr1:19979285-19980108	rs11573156:G:C	peak3969	chr1:19979463-19980075	rs11573156:G:C	1	peak3969
peak208713	chr8:86328198-86328924	rs2953511:G:A	peak327066	chr8:86328356-86328842	rs2953511:G:A	1	peak327066
peak208752	chr8:86842221-86843396	rs2100663:C:G	peak327129	chr8:86842297-86842668	rs1458121:A:G	1	peak327129
peak208816	chr8:88326751-88329123	rs16892543:G:C	peak327227	chr8:88328479-88328925	rs13256784:G:C	0.823	peak327227
peak208913	chr8:90459748-90460563	rs2205158:C:T	peak327381	chr8:90460099-90460476	rs2205157:C:T	0.999	peak327381
peak208914	chr8:90466980-90468276	rs2223010:A:G	peak327382	chr8:90467240-90468245	rs9297857:A:C	0.985	peak327382
peak20906	chr10:7811233-7812198	rs1812469:G:A	peak31812	chr10:7811730-7812129	rs34113299:CA:C	0.996	peak31812
peak209249	chr8:95099951-95101615	rs6471521:A:C	peak327857	chr8:95100352-95101365	rs6471521:A:C	1	peak327857
peak209520	chr8:97756650-97757055	rs12546567:T:C	peak328237	chr8:97756686-97757013	rs12546567:T:C	1	peak328237
peak209535	chr8:97848993-97850473	rs11781043:T:C	peak328255	chr8:97849225-97850407	rs11781043:T:C	1	peak328255
peak209609	chr8:98374171-98374704	rs7815872:A:C	peak328351	chr8:98374245-98374672	rs7815872:A:C	1	peak328351
peak209860	chr8:101573334-101574791	rs548564:G:A	peak328707	chr8:101573382-101574539	rs548564:G:A	1	peak328707
peak210006	chr8:103055084-103056330	rs2270673:C:T	peak328924	chr8:103055865-103056264	rs2270673:C:T	1	peak328924
peak210007	chr8:103070017-103070457	rs4734684:G:A	peak328927	chr8:103070086-103070375	rs4734684:G:A	1	peak328927
peak210015	chr8:103124753-103125408	rs6990544:C:T	peak328940	chr8:103124908-103125247	rs6990544:C:T	1	peak328940
peak210088	chr8:104307435-104308032	rs2511631:T:G	peak329041	chr8:104307473-104307959	rs2514641:G:A	0.999	peak329041
peak21017	chr10:10418106-10418847	rs2252364:C:T	peak31972	chr10:10418445-10418737	rs11256599:A:T	0.938	peak31972
peak210219	chr8:106080746-106081539	rs993176:A:G	peak329217	chr8:106080814-106081373	rs993176:A:G	1	peak329217
peak210402	chr8:108860983-108861707	rs11997464:A:C	peak329460	chr8:108861324-108861688	rs11997464:A:C	1	peak329460
peak210435	chr8:109505757-109506691	rs1379366:A:C	peak329504	chr8:109506127-109506471	rs1379367:G:A	0.911	peak329504
peak210585	chr8:112457224-112458607	rs4338134:T:C	peak329710	chr8:112457656-112458229	rs5004569:G:C	0.999	peak329710
peak210678	chr8:114921626-114922643	rs1872783:A:C	peak329808	chr8:114921644-114922500	rs1872783:A:C	1	peak329808
peak210871	chr8:117868573-117869467	rs4876765:T:C	peak330074	chr8:117868721-117869287	rs4876765:T:C	1	peak330074
peak211051	chr8:119070432-119070982	rs72682416:G:A	peak330321	chr8:119070528-119070774	rs72682416:G:A	1	peak330321
peak211057	chr8:119154367-119154741	rs2465394:C:T	peak330329	chr8:119154448-119154711	rs2113885:G:T	1	peak330329
peak211098	chr8:119680949-119681862	rs2326308:C:T	peak330385	chr8:119681057-119681668	rs2326308:C:T	1	peak330385
peak211249	chr8:121105160-121106170	rs13275987:G:A	peak330585	chr8:121105245-121105855	rs13275987:G:A	1	peak330585
peak211293	chr8:121929497-121929954	rs75669756:T:C	peak330647	chr8:121929664-121929918	rs75669756:T:C	1	peak330647
peak211401	chr8:123012091-123013139	rs12549382:A:G	peak330820	chr8:123012298-123012972	rs12549382:A:G	1	peak330820
peak211519	chr8:124037564-124038459	rs4870886:T:A	peak330970	chr8:124037642-124038174	rs7841692:A:G	0.999	peak330970
peak211521	chr8:124044471-124045030	rs6984093:G:T	peak330972	chr8:124044511-124044849	rs7003992:T:C	0.997	peak330972
peak211536	chr8:124201921-124202706	rs72722871:A:G	peak330995	chr8:124202116-124202568	rs10095890:G:A	0.996	peak330995
peak211588	chr8:124619140-124619961	rs4870914:A:G	peak331066	chr8:124619192-124619931	rs4870914:A:G	1	peak331066
peak211624	chr8:124738006-124738289	rs6983655:T:C	peak331114	chr8:124738013-124738269	rs7001314:C:T	0.999	peak331114
peak211644	chr8:124866422-124867124	rs6987095:A:C	peak331146	chr8:124866495-124866885	rs4871562:T:C	0.992	peak331146
peak211733	chr8:125462877-125464449	rs2954017:T:C	peak331267	chr8:125462986-125463778	rs6999569:A:G	0.806	peak331267,peak331268
peak211821	chr8:126404310-126405779	rs59575143:C:T	peak331386	chr8:126404823-126405201	rs10505472:A:G	0.951	peak331386
peak211905	chr8:127400687-127401440	rs10808556:C:T	peak331492	chr8:127400735-127401051	rs10808556:C:T	1	peak331492
peak211910	chr8:127494501-127495114	rs12156128:C:G	peak331499	chr8:127494811-127495089	rs1562435:A:G	0.993	peak331499
peak211946	chr8:127832303-127833458	rs35352864:G:A	peak331536	chr8:127832718-127833415	rs35352864:G:A	1	peak331536
peak21197	chr10:12053312-12054392	rs12782067:A:G	peak32240	chr10:12053469-12054350	rs12782067:A:G	1	peak32240
peak211994	chr8:128053661-128054182	rs1392025:G:A	peak331604	chr8:128053736-128054089	rs1392025:G:A	1	peak331604
peak211995	chr8:128070073-128071680	rs2720667:G:A	peak331605	chr8:128070130-128070580	rs2720666:G:A	1	peak331605,peak331606
peak212019	chr8:128193291-128194117	rs72722769:A:G	peak331636	chr8:128193619-128194030	rs17793170:G:A	0.997	peak331636
peak212063	chr8:128607811-128608384	rs1476164:A:T	peak331686	chr8:128607951-128608269	rs5894942:TCTC:T	0.999	peak331686
peak212280	chr8:131554631-131555687	rs62532837:G:A	peak331988	chr8:131554720-131555234	rs62532837:G:A	1	peak331988
peak21232	chr10:12265280-12266271	rs11257655:C:T	peak32285	chr10:12265626-12266181	rs11257655:C:T	1	peak32285
peak212353	chr8:132496883-132497461	rs4736417:C:G	peak332111	chr8:132497108-132497368	rs4736417:C:G	1	peak332111
peak21266	chr10:12470779-12471711	rs2768415:C:T	peak32324	chr10:12470789-12471650	rs11267331:GGCTGGCTGTGT:G	0.964	peak32324
peak212709	chr8:135725167-135726320	rs11993063:T:C	peak332678	chr8:135725321-135725721	rs11993063:T:C	1	peak332678,peak332679
peak21294	chr10:12626617-12627259	rs11257922:A:G	peak32371	chr10:12626879-12627216	rs11257922:A:G	1	peak32371
peak212966	chr8:139913897-139914500	rs11784933:C:T	peak333173	chr8:139913948-139914303	rs34081980:G:C	0.993	peak333173
peak21297	chr10:12634553-12635084	rs11257926:T:C	peak32375	chr10:12634571-12634830	rs17152034:C:T	0.943	peak32375
peak21317	chr10:12751427-12752204	rs11592385:C:T	peak32410	chr10:12751561-12752136	rs4393220:C:T	0.995	peak32410
peak213213	chr8:141796476-141797384	rs9772881:G:A	peak333636	chr8:141796551-141797207	rs9772881:G:A	1	peak333636
peak213232	chr8:142108866-142109992	rs9969429:G:A	peak333732	chr8:142108941-142109320	rs11167121:T:A	0.997	peak333732,peak333733
peak213297	chr8:142675981-142676598	rs10956997:A:T	peak333911	chr8:142676016-142676455	rs10956997:A:T	1	peak333911
peak213405	chr8:143446720-143447284	rs11776571:G:A	peak334130	chr8:143446826-143447250	rs11776571:G:A	1	peak334130
peak213406	chr8:143449367-143450307	rs4874126:G:A	peak334132	chr8:143449566-143450073	rs4874123:C:T	0.989	peak334132
peak213425	chr8:143552963-143554177	rs117666709:G:A	peak334169	chr8:143552968-143554159	rs117666709:G:A	1	peak334169
peak213486	chr8:143959379-143959774	rs6558408:G:A	peak334274	chr8:143959422-143959732	rs6558408:G:A	1	peak334274
peak213543	chr8:144416369-144416969	rs2280838:C:T	peak334388	chr8:144416411-144416882	rs2280838:C:T	1	peak334388
peak213623	chr9:211611-211902	rs520015:C:G	peak334531	chr9:211643-211861	rs520015:C:G	1	peak334531
peak213651	chr9:469572-471139	rs913700:A:C	peak334564	chr9:469647-470641	rs913700:A:C	1	peak334564
peak213663	chr9:613671-614780	rs58960694:G:A	peak334585	chr9:614482-614751	rs58960694:G:A	1	peak334585
peak21374	chr10:13337682-13338735	rs3802583:A:G	peak32518	chr10:13337824-13338261	rs3802583:A:G	1	peak32518,peak32519
peak213935	chr9:4144831-4145892	rs2380938:A:G	peak334999	chr9:4145538-4145836	rs2380938:A:G	1	peak334999,peak334998
peak213973	chr9:4417658-4419027	rs2381120:G:C	peak335052	chr9:4418460-4418773	rs2381120:G:C	1	peak335052
peak214014	chr9:4644613-4644990	rs301466:C:T	peak335115	chr9:4644656-4644947	rs301466:C:T	1	peak335115
peak214093	chr9:5485426-5486066	rs9299018:T:C	peak335233	chr9:5485638-5486002	rs9299018:T:C	1	peak335233
peak214142	chr9:5939470-5939994	rs10758723:G:A	peak335299	chr9:5939586-5939900	rs10815313:G:A	0.986	peak335299
peak214231	chr9:6790060-6790400	rs71490285:C:T	peak335423	chr9:6790073-6790334	rs71490285:C:T	1	peak335423
peak214370	chr9:8715833-8716157	rs1821429:A:G	peak335634	chr9:8715854-8716127	rs6477327:C:A	0.939	peak335634
peak214552	chr9:12973710-12974111	rs1332079:A:G	peak335891	chr9:12973786-12974073	rs1332079:A:G	1	peak335891
peak214559	chr9:13070601-13071678	rs10124929:T:A	peak335900	chr9:13070661-13071547	rs74754253:T:C	0.99	peak335900
peak214625	chr9:13804433-13804989	rs62534717:C:G	peak335980	chr9:13804539-13804829	rs62534717:C:G	1	peak335980
peak214697	chr9:14383214-14383525	rs17708974:C:A	peak336080	chr9:14383219-14383525	rs17708974:C:A	1	peak336080
peak214743	chr9:15157221-15158674	rs10738388:C:G	peak336158	chr9:15157236-15157910	rs7847343:T:G	0.993	peak336158,peak336159
peak214888	chr9:17120033-17120775	rs399345:T:C	peak336393	chr9:17120158-17120564	rs399345:T:C	1	peak336393
peak214939	chr9:17967772-17968255	rs2772684:T:C	peak336475	chr9:17967822-17968121	rs1778170:A:G	0.999	peak336475
peak21513	chr10:14532523-14533346	rs7092817:A:G	peak32721	chr10:14532668-14533286	rs11259161:C:G	0.991	peak32721
peak21520	chr10:14559502-14559819	rs12266654:G:A	peak32732	chr10:14559503-14559805	rs12776277:A:G	0.996	peak32732
peak215312	chr9:23321057-23321437	rs10811885:T:C	peak337025	chr9:23321073-23321428	rs1330933:T:C	0.996	peak337025
peak21535	chr10:14594886-14595587	rs4748100:A:G	peak32750	chr10:14594922-14595415	rs4748100:A:G	1	peak32750
peak215557	chr9:27688797-27689336	rs2150021:T:G	peak337381	chr9:27688976-27689296	rs10968061:T:C	0.999	peak337381
peak215574	chr9:27851339-27852214	rs6476019:G:T	peak337405	chr9:27851875-27852194	rs6476019:G:T	1	peak337405
peak215680	chr9:31124294-31124971	rs1335154:T:G	peak337570	chr9:31124432-31124798	rs1335154:T:G	1	peak337570
peak215722	chr9:31908279-31909462	rs73463178:G:A	peak337623	chr9:31908386-31909442	rs7858408:A:C	0.995	peak337623
peak215791	chr9:32885961-32886473	rs10971181:T:C	peak337738	chr9:32886071-32886487	rs10971181:T:C	1	peak337738
peak215828	chr9:33162750-33163372	rs56030777:G:A	peak337792	chr9:33162983-33163265	rs62544387:C:G	0.995	peak337792
peak215867	chr9:33424800-33425890	rs62544649:C:G	peak337855	chr9:33424976-33425630	rs62544649:C:G	1	peak337855
peak215885	chr9:33523073-33524912	rs7866888:C:A	peak337876	chr9:33523344-33524401	rs7866888:C:A	1	peak337876
peak215919	chr9:33840454-33840715	rs72725374:T:C	peak337916	chr9:33840457-33840682	rs72725374:T:C	1	peak337916
peak216288	chr9:37466433-37466707	rs10758430:G:C	peak338492	chr9:37466451-37466696	rs10758430:G:C	1	peak338492
peak216295	chr9:37497224-37497839	rs74553341:G:A	peak338500	chr9:37497246-37497812	rs112248189:T:C	0.989	peak338500
peak216390	chr9:38380939-38381559	rs28759073:G:A	peak338671	chr9:38380995-38381517	rs28759073:G:A	1	peak338671
peak216416	chr9:38672209-38673047	rs7854134:C:T	peak338714	chr9:38672387-38672807	rs7854134:C:T	1	peak338714
peak216782	chr9:69465281-69465990	rs1631688:A:G	peak339138	chr9:69465498-69465948	rs1631688:A:G	1	peak339138
peak216934	chr9:71045642-71046346	rs2430870:T:G	peak339345	chr9:71045812-71046235	rs2430870:T:G	1	peak339345
peak21710	chr10:16891286-16892380	rs1877479:G:C	peak32984	chr10:16891331-16892307	rs2669154:G:T	0.835	peak32984
peak217111	chr9:72585715-72586185	rs4300059:C:A	peak339583	chr9:72585744-72586129	rs4300059:C:A	1	peak339583
peak21724	chr10:17022853-17023148	rs7897550:G:A	peak33007	chr10:17022917-17023126	rs11254331:G:A	0.992	peak33007
peak217256	chr9:74940588-74941253	rs12379215:T:C	peak339804	chr9:74940602-74941026	rs12379215:T:C	1	peak339804
peak217288	chr9:75161301-75161815	rs11144269:A:T	peak339847	chr9:75161510-75161791	rs11144269:A:T	1	peak339847
peak217341	chr9:75820469-75821542	rs59189632:G:A	peak339928	chr9:75820592-75821350	rs10869650:C:A	0.997	peak339928
peak217367	chr9:76108159-76108733	rs914365:C:T	peak339962	chr9:76108255-76108535	rs914365:C:T	1	peak339962
peak2177	chr1:20851796-20852273	rs10799670:T:C	peak4118	chr1:20851851-20852098	rs10799670:T:C	1	peak4118
peak217748	chr9:81459519-81459999	rs34926332:C:T	peak340501	chr9:81459612-81459915	rs34926332:C:T	1	peak340501
peak217891	chr9:83219106-83220357	rs12237222:G:T	peak340720	chr9:83219119-83220070	rs12237222:G:T	1	peak340720
peak218087	chr9:86054412-86055100	rs12553480:A:G	peak341016	chr9:86054744-86055083	rs12553480:A:G	1	peak341016
peak218169	chr9:87359753-87360594	rs7855985:G:A	peak341141	chr9:87359959-87360333	rs7855985:G:A	1	peak341141
peak218179	chr9:87422909-87424412	rs7044804:A:G	peak341154	chr9:87422972-87424317	rs7044804:A:G	1	peak341154
peak218184	chr9:87479625-87480546	rs10868604:A:T	peak341160	chr9:87479712-87480258	rs10780842:T:G	1	peak341160
peak218189	chr9:87514056-87514495	rs12351156:T:C	peak341166	chr9:87514166-87514473	rs12351156:T:C	1	peak341166
peak218220	chr9:87642978-87643703	rs1927976:C:T	peak341209	chr9:87643210-87643599	chr9:87643497:CTT:C:CTT:C	0.81	peak341209
peak218588	chr9:91196046-91196328	rs773509:C:T	peak341828	chr9:91196049-91196339	rs773509:C:T	1	peak341828
peak218593	chr9:91212023-91212430	rs773507:G:T	peak341835	chr9:91212090-91212360	rs773507:G:T	1	peak341835
peak218744	chr9:93023917-93024741	rs34002351:C:T	peak342089	chr9:93024072-93024699	rs34274030:C:T	0.996	peak342089
peak218765	chr9:93132578-93132863	rs7042420:C:T	peak342116	chr9:93132589-93132841	rs12342201:G:A	0.848	peak342116
peak219169	chr9:97425369-97426280	rs7863717:G:A	peak342827	chr9:97425654-97426007	rs7863717:G:A	1	peak342827
peak219209	chr9:97788873-97789905	rs12352658:G:A	peak342892	chr9:97789199-97789798	rs12352658:G:A	1	peak342892
peak219273	chr9:98225123-98225457	rs16914086:G:A	peak342981	chr9:98225130-98225400	rs16914086:G:A	1	peak342981
peak21936	chr10:20105162-20105749	rs11011803:T:C	peak33338	chr10:20105303-20105713	rs7067947:A:G	0.947	peak33338
peak219655	chr9:104763380-104764932	rs62565988:G:A	peak343633	chr9:104763567-104764750	rs62565988:G:A	1	peak343633
peak219713	chr9:104975980-104976535	rs7026781:G:A	peak343709	chr9:104976137-104976544	rs7026781:G:A	1	peak343709
peak219909	chr9:107480339-107480853	rs10816518:C:A	peak344005	chr9:107480391-107480738	rs10816518:C:A	1	peak344005
peak220058	chr9:109129326-109129843	rs17552292:C:T	peak344214	chr9:109129548-109129817	rs17552292:C:T	1	peak344214
peak220120	chr9:109517698-109518610	rs6477709:A:G	peak344310	chr9:109517780-109518558	rs6477709:A:G	1	peak344310
peak220132	chr9:109745383-109746316	rs7858265:G:A	peak344332	chr9:109745591-109746186	rs7858265:G:A	1	peak344332
peak220140	chr9:109795628-109796088	rs12377510:T:C	peak344345	chr9:109795662-109795990	rs10980042:G:A	0.979	peak344345
peak220164	chr9:109907382-109908445	rs9886729:G:C	peak344381	chr9:109907419-109908230	rs9886729:G:C	1	peak344381
peak220257	chr9:110604042-110604831	rs10817045:G:A	peak344504	chr9:110604190-110604655	rs10817045:G:A	1	peak344504
peak220350	chr9:111927593-111928516	rs3824464:A:G	peak344628	chr9:111928039-111928280	rs3739701:T:C	0.871	peak344628
peak220513	chr9:113377727-113378290	rs16936474:G:A	peak344845	chr9:113377941-113378211	rs112268589:T:A	0.999	peak344845
peak220776	chr9:115107719-115108164	rs1360291:C:T	peak345247	chr9:115107758-115108150	rs1250023:C:T	0.999	peak345247
peak220796	chr9:115591469-115592182	rs62575263:G:A	peak345275	chr9:115591553-115592109	rs62575263:G:A	1	peak345275
peak220851	chr9:116504705-116505450	rs11793212:T:C	peak345356	chr9:116504881-116505338	rs11793212:T:C	1	peak345356
peak220957	chr9:118750759-118752212	rs12377026:A:G	peak345521	chr9:118750922-118751853	rs12379780:G:C	0.999	peak345522,peak345521
peak221253	chr9:121860295-121862041	rs10985423:G:A	peak345967	chr9:121860811-121861122	rs10985423:G:A	1	peak345967
peak221266	chr9:122001130-122002269	rs12341511:A:G	peak345994	chr9:122001210-122002040	rs12341511:A:G	1	peak345994
peak221487	chr9:124290117-124290589	rs10760347:G:T	peak346338	chr9:124290197-124290597	rs10760347:G:T	1	peak346338
peak221615	chr9:125532377-125533210	rs72769107:G:A	peak346545	chr9:125532897-125533189	rs72769107:G:A	1	peak346545
peak221650	chr9:125825545-125826186	rs4287036:G:T	peak346582	chr9:125825709-125826122	rs4287036:G:T	1	peak346582
peak221686	chr9:126343202-126343909	rs12554306:A:G	peak346666	chr9:126343306-126343754	rs12554306:A:G	1	peak346666
peak221704	chr9:126487886-126489445	rs4837092:T:C	peak346704	chr9:126488348-126488683	rs10987301:T:C	0.976	peak346704
peak221793	chr9:127347985-127348443	rs62579672:C:G	peak346878	chr9:127348145-127348415	rs62579672:C:G	1	peak346878
peak221944	chr9:128192592-128193489	rs7853429:C:T	peak347108	chr9:128192733-128193363	rs7853212:A:G	0.999	peak347108
peak221999	chr9:128702126-128704379	rs13283282:C:G	peak347209	chr9:128702288-128704083	rs13283282:C:G	1	peak347209
peak222066	chr9:129141472-129141761	rs10988223:T:C	peak347320	chr9:129141484-129141770	rs3124512:C:T	0.982	peak347320
peak222084	chr9:129268668-129269178	rs7870137:G:C	peak347364	chr9:129268730-129268982	rs10819483:T:G	1	peak347364
peak22209	chr10:23505452-23506672	rs12261799:A:G	peak33727	chr10:23505525-23506479	rs12254275:C:A	0.996	peak33727
peak22210	chr10:23512251-23512974	rs12244668:A:G	peak33729	chr10:23512432-23512778	rs11013543:C:A	0.997	peak33729
peak222149	chr9:129761598-129763474	rs58752549:T:G	peak347478	chr9:129762501-129762973	rs35756634:G:A	0.999	peak347478
peak222165	chr9:129892977-129893595	rs34653729:C:T	peak347504	chr9:129893056-129893371	rs10739763:T:C	0.998	peak347504
peak222226	chr9:130282001-130282901	rs7866146:G:A	peak347589	chr9:130282051-130282647	rs1557125:G:A	0.999	peak347589
peak222251	chr9:130526569-130527526	rs6597545:G:C	peak347665	chr9:130526728-130527457	rs6597545:G:C	1	peak347665
peak222408	chr9:131697821-131698862	rs56363350:C:T	peak347943	chr9:131697879-131698776	rs56363350:C:T	1	peak347943
peak222560	chr9:133498888-133500205	rs17150614:C:T	peak348247	chr9:133499049-133499935	rs17150614:C:T	1	peak348247
peak222606	chr9:133759338-133760285	rs12346239:T:C	peak348334	chr9:133759506-133759973	rs12346239:T:C	1	peak348334
peak222631	chr9:133895412-133895651	rs7859202:T:G	peak348381	chr9:133895412-133895642	rs7859202:T:G	1	peak348381
peak222690	chr9:134226126-134226713	rs7028191:C:T	peak348485	chr9:134226163-134226675	rs1475718:G:A	0.979	peak348485
peak223079	chr9:136949192-136951099	rs10870148:T:C	peak349334	chr9:136949270-136950602	rs10870148:T:C	1	peak349334
peak22406	chr10:26435908-26436306	rs3006807:G:C	peak34050	chr10:26435965-26436227	rs1335552:T:C	0.996	peak34050
peak22409	chr10:26445395-26446021	rs2992257:C:T	peak34052	chr10:26445432-26445740	rs2992257:C:T	1	peak34052
peak22475	chr10:26938623-26940241	rs56057299:C:T	peak34133	chr10:26939313-26939905	rs56057299:C:T	1	peak34133
peak22497	chr10:27319647-27320661	rs12775266:C:T	peak34162	chr10:27319674-27320523	rs12775266:C:T	1	peak34162
peak22519	chr10:27601364-27602521	rs10741137:C:G	peak34189	chr10:27601508-27602461	rs6482632:T:C	1	peak34189
peak22532	chr10:27899056-27900149	rs59088367:A:G	peak34209	chr10:27899425-27900017	rs2152016:G:A	0.997	peak34209
peak22539	chr10:28111669-28112314	rs12776665:C:A	peak34216	chr10:28111733-28112094	rs12776665:C:A	1	peak34216
peak22580	chr10:28569534-28570208	rs332136:C:T	peak34265	chr10:28569637-28570180	rs332136:C:T	1	peak34265
peak22598	chr10:28734659-28735570	rs1014607:G:A	peak34284	chr10:28735009-28735529	rs1014607:G:A	1	peak34284
peak22657	chr10:29380779-29381587	rs4749414:G:A	peak34378	chr10:29381225-29381545	rs4749414:G:A	1	peak34378
peak2278	chr1:21673327-21673763	rs829402:G:C	peak4267	chr1:21673422-21673734	rs829402:G:C	1	peak4267
peak22791	chr10:30522439-30523373	rs61839714:C:T	peak34578	chr10:30522594-30523104	rs6481688:G:C	0.992	peak34578
peak22810	chr10:30596435-30597316	rs10826828:T:C	peak34600	chr10:30596503-30596796	rs10826828:T:C	1	peak34600
peak22812	chr10:30605273-30607066	rs300816:T:C	peak34603	chr10:30605294-30606845	rs300816:T:C	1	peak34603
peak22832	chr10:30751722-30752291	rs11812218:G:A	peak34627	chr10:30751896-30752216	rs10826861:A:G	0.965	peak34627
peak22934	chr10:31961400-31962100	rs6481765:G:A	peak34763	chr10:31961731-31962045	rs6481765:G:A	1	peak34763
peak23078	chr10:33470241-33470770	rs7900660:A:G	peak34996	chr10:33470283-33470654	rs7900660:A:G	1	peak34996
peak2321	chr1:21946819-21947437	rs4077296:G:T	peak4339	chr1:21946894-21947253	rs4077296:G:T	1	peak4339
peak23214	chr10:34739128-34739370	rs61843476:G:A	peak35191	chr10:34739129-34739383	rs61843476:G:A	1	peak35191
peak23238	chr10:34965915-34966501	rs2812968:A:G	peak35232	chr10:34965956-34966318	rs2812968:A:G	1	peak35232
peak23261	chr10:35203506-35204110	rs2384352:A:G	peak35263	chr10:35203772-35204077	rs11010122:A:C	0.947	peak35263
peak23504	chr10:42367097-42368313	rs2505803:A:C	peak35627	chr10:42367477-42368297	rs2505803:A:C	1	peak35627
peak23537	chr10:42951471-42952762	rs3004255:T:G	peak35688	chr10:42951528-42952694	rs3004255:T:G	1	peak35688
peak2364	chr1:22412552-22413982	rs7533770:C:T	peak4438	chr1:22413403-22413728	rs10799750:C:T	0.999	peak4436,peak4438,peak4437
peak23683	chr10:44036258-44036999	rs11238819:C:T	peak35960	chr10:44036425-44036833	rs11238819:C:T	1	peak35960
peak23689	chr10:44068713-44070071	rs182075:A:G	peak35972	chr10:44068789-44069833	rs182075:A:G	1	peak35972
peak2371	chr1:22471146-22471672	rs10753538:G:A	peak4447	chr1:22471204-22471486	rs16827211:G:A	0.998	peak4447
peak24212	chr10:50251383-50251841	rs7081577:G:A	peak36901	chr10:50251531-50251791	rs7081577:G:A	1	peak36901
peak24216	chr10:50286429-50288106	rs6481165:C:T	peak36907	chr10:50287140-50287795	rs6481165:C:T	1	peak36907,peak36906
peak2424	chr1:23083540-23084134	rs2235546:G:A	peak4564	chr1:23083808-23084095	rs34565529:C:CTT	0.984	peak4564
peak24254	chr10:50538511-50539579	rs7902354:C:T	peak36960	chr10:50538854-50539422	rs10826163:G:A	0.998	peak36960
peak24359	chr10:51820906-51821430	rs1937689:T:C	peak37088	chr10:51821016-51821382	rs2226254:A:G	0.999	peak37088
peak24367	chr10:51918612-51919863	rs1937682:A:T	peak37097	chr10:51918820-51919428	rs1937682:A:T	1	peak37097
peak24441	chr10:53070214-53070742	rs7910283:G:A	peak37203	chr10:53070413-53070719	rs10824876:G:A	1	peak37203
peak24458	chr10:53487017-53487955	rs400440:C:T	peak37234	chr10:53487067-53487685	rs401230:C:T	0.982	peak37234
peak24478	chr10:53953715-53954176	rs7093596:A:G	peak37263	chr10:53953733-53954027	rs1900422:T:C	0.992	peak37263
peak24548	chr10:56085330-56085751	rs9415405:G:C	peak37378	chr10:56085411-56085727	rs1908354:C:T	0.97	peak37378
peak24595	chr10:57703440-57704321	rs72801914:C:G	peak37466	chr10:57703530-57704194	rs72801918:A:G	1	peak37466
peak24601	chr10:57790376-57791837	rs6481344:A:T	peak37476	chr10:57790744-57791233	rs7477818:C:A	0.998	peak37476
peak24859	chr10:60645511-60646881	rs34097039:G:A	peak37814	chr10:60645979-60646293	rs34097039:G:A	1	peak37814
peak24911	chr10:61075321-61076245	rs4351766:G:C	peak37885	chr10:61075494-61076086	rs4948443:T:C	0.998	peak37885
peak24953	chr10:61830147-61831156	rs10994940:A:G	peak37942	chr10:61830328-61831046	rs10994940:A:G	1	peak37942
peak25025	chr10:62527093-62528995	rs61866265:G:A	peak38047	chr10:62528524-62528866	rs61866265:G:A	1	peak38047
peak25067	chr10:62924389-62924804	rs10740097:C:T	peak38110	chr10:62924417-62924757	rs10740097:C:T	1	peak38110
peak25120	chr10:63366821-63367303	rs10822164:G:A	peak38185	chr10:63366960-63367265	rs6479896:T:C	0.999	peak38185
peak25176	chr10:63871986-63872834	rs12269414:G:A	peak38268	chr10:63872128-63872674	rs12269414:G:A	1	peak38268
peak25224	chr10:65099883-65100565	rs7085040:T:C	peak38358	chr10:65100225-65100508	rs10822451:T:C	0.999	peak38358
peak25266	chr10:66321737-66323149	rs7920730:A:G	peak38428	chr10:66321751-66323043	rs7920730:A:G	1	peak38428
peak2527	chr1:23837932-23839970	rs58035855:G:C	peak4713	chr1:23839101-23839554	rs58035855:G:C	1	peak4713,peak4714,peak4712
peak25298	chr10:67086431-67087439	rs2394344:G:C	peak38474	chr10:67086907-67087415	rs4745927:A:C	0.991	peak38474
peak25359	chr10:68047522-68048265	rs689211:C:A	peak38553	chr10:68047653-68048116	rs689211:C:A	1	peak38553
peak25360	chr10:68049433-68050099	rs623494:G:A	peak38554	chr10:68049739-68050047	rs623494:G:A	1	peak38554
peak25375	chr10:68198678-68199260	rs10998010:C:T	peak38570	chr10:68198631-68198932	rs7100561:G:A	0.999	peak38570,peak38571
peak25454	chr10:69222055-69223266	rs4746822:C:T	peak38684	chr10:69222287-69223020	rs35696875:T:TCA	0.988	peak38684
peak25585	chr10:70326126-70326471	rs55692839:C:T	peak38918	chr10:70326149-70326435	rs55692839:C:T	1	peak38918
peak256	chr1:2297981-2298250	rs2843161:C:T	peak428	chr1:2297988-2298224	rs2843161:C:T	1	peak428
peak25625	chr10:70596034-70596452	rs10823581:G:C	peak38985	chr10:70596107-70596438	rs10823581:G:C	1	peak38985
peak25632	chr10:70666728-70667802	rs72813302:A:G	peak38997	chr10:70667211-70667622	rs77443168:G:A	1	peak38997
peak25660	chr10:70885745-70886890	rs57037268:G:A	peak39054	chr10:70885868-70886437	rs57037268:G:A	1	peak39054,peak39055
peak2567	chr1:24294148-24295403	rs4648965:A:G	peak4790	chr1:24294295-24295227	rs12130897:C:T	0.998	peak4790
peak25699	chr10:71307414-71309834	rs10509333:T:A	peak39161	chr10:71308264-71308672	rs80106187:CCTTCCTTATAGA:C	0.994	peak39160,peak39161,peak39162
peak25719	chr10:71391692-71392023	rs1890886:C:T	peak39187	chr10:71391717-71392014	rs1890886:C:T	1	peak39187
peak26219	chr10:75926607-75927151	rs4746340:C:G	peak39925	chr10:75926826-75927125	rs4746340:C:G	1	peak39925
peak2629	chr1:24859189-24859786	rs6600275:T:C	peak4879	chr1:24859410-24859740	rs6600275:T:C	1	peak4879
peak26307	chr10:77249868-77250625	rs501254:C:G	peak40055	chr10:77250060-77250578	rs501254:C:G	1	peak40055
peak26416	chr10:78165580-78166271	rs56294941:A:C	peak40245	chr10:78165622-78165962	rs56365843:G:A	0.999	peak40245
peak26599	chr10:79335150-79336423	rs12411493:A:G	peak40550	chr10:79335260-79336323	rs12414178:C:T	0.997	peak40550
peak26612	chr10:79397624-79398262	rs7900144:A:G	peak40567	chr10:79397650-79398202	rs7900144:A:G	1	peak40567
peak26626	chr10:79424100-79425714	rs11592083:C:T	peak40584	chr10:79424168-79425557	rs11592083:C:T	1	peak40584
peak26737	chr10:80443409-80444408	rs4934168:G:A	peak40742	chr10:80443471-80444100	rs4934167:G:A	0.981	peak40742
peak26779	chr10:80684262-80684678	rs67036031:G:A	peak40803	chr10:80684296-80684557	rs66491571:G:A	0.998	peak40803
peak26790	chr10:80896670-80897375	rs1911461:T:C	peak40826	chr10:80896877-80897353	rs1911461:T:C	1	peak40826
peak26802	chr10:81145972-81147043	rs7090568:A:G	peak40850	chr10:81146028-81146862	rs1932711:G:A	1	peak40850
peak26924	chr10:83978436-83979625	rs11200768:A:G	peak41069	chr10:83978603-83979475	rs11200768:A:G	1	peak41069
peak27025	chr10:85145764-85146677	rs1416931:G:A	peak41227	chr10:85145960-85146404	rs1416931:G:A	1	peak41227
peak27061	chr10:85863967-85864592	rs75625857:G:A	peak41317	chr10:85863991-85864504	rs75625857:G:A	1	peak41317
peak27065	chr10:85934307-85934923	rs76765968:T:C	peak41325	chr10:85934307-85934918	rs76765968:T:C	1	peak41325
peak27086	chr10:86163108-86164837	rs7912161:G:A	peak41383	chr10:86163157-86164798	rs7912161:G:A	1	peak41383
peak27253	chr10:87598453-87599594	rs7077717:A:C	peak41637	chr10:87598560-87599109	rs7077717:A:C	1	peak41637
peak27367	chr10:88472610-88473127	rs2576181:T:G	peak41775	chr10:88472638-88472876	rs2576181:T:G	1	peak41775
peak27405	chr10:88840826-88841726	rs1214559:T:C	peak41815	chr10:88840854-88841680	rs1214558:A:G	0.968	peak41815
peak27453	chr10:89224659-89225653	rs2297475:A:G	peak41877	chr10:89224761-89225481	rs59164855:CGCCCTCTCGCGGA:C	0.985	peak41877
peak27492	chr10:89439902-89440661	rs7088848:T:C	peak41932	chr10:89440195-89440639	rs7088848:T:C	1	peak41932
peak27632	chr10:91540643-91541062	rs72819225:T:C	peak42128	chr10:91540668-91541012	rs12246270:G:A	0.981	peak42128
peak27999	chr10:95175950-95176784	rs17451604:G:A	peak42641	chr10:95176188-95176575	rs17451604:G:A	1	peak42641
peak28093	chr10:95661839-95662398	rs4918955:G:A	peak42772	chr10:95661867-95662219	rs4918955:G:A	1	peak42772
peak28095	chr10:95663285-95663831	rs6946:C:A	peak42774	chr10:95663475-95663826	rs6946:C:A	1	peak42774
peak28202	chr10:96789593-96789986	rs7477274:T:C	peak42937	chr10:96789660-96789932	rs7477274:T:C	1	peak42937
peak28337	chr10:97882184-97883324	rs684225:C:A	peak43171	chr10:97882273-97882922	rs684225:C:A	1	peak43171
peak28389	chr10:98396018-98396473	rs11598689:G:T	peak43261	chr10:98396066-98396464	rs11598689:G:T	1	peak43261
peak28398	chr10:98469541-98469949	rs1998757:G:C	peak43282	chr10:98469564-98469926	rs1998757:G:C	1	peak43282
peak28775	chr10:102695889-102697112	rs10883765:T:C	peak43886	chr10:102695965-102696453	rs10883765:T:C	1	peak43886,peak43887
peak28873	chr10:103515303-103516004	rs2148021:T:A	peak44035	chr10:103515399-103515841	rs147243974:TCTCTGGACAGCCCC:T	0.996	peak44035
peak28927	chr10:103818267-103819545	rs2902637:T:C	peak44120	chr10:103818462-103819414	rs2902637:T:C	1	peak44120
peak29059	chr10:106105496-106106881	rs624455:C:G	peak44344	chr10:106106129-106106533	rs624455:C:G	1	peak44344
peak29313	chr10:110433633-110434173	rs2419563:C:G	peak44740	chr10:110433828-110434141	rs2419563:C:G	1	peak44740
peak29354	chr10:110735509-110736269	rs2039902:C:T	peak44798	chr10:110735649-110736113	rs2039902:C:T	1	peak44798
peak29624	chr10:113347371-113348111	rs7090401:C:T	peak45198	chr10:113347533-113347842	rs4336963:T:C	0.996	peak45198
peak29632	chr10:113433648-113435339	rs1416131:A:G	peak45216	chr10:113435008-113435286	rs7086016:G:A	0.996	peak45216
peak29814	chr10:114730272-114730971	rs12761207:T:C	peak45483	chr10:114730338-114730935	rs11598354:T:C	0.999	peak45483
peak29857	chr10:115566507-115567393	rs1414639:A:G	peak45541	chr10:115566899-115567200	rs1414639:A:G	1	peak45541
peak29876	chr10:116007341-116007714	rs180647:T:C	peak45578	chr10:116007382-116007690	rs180646:A:G	0.996	peak45578
peak29928	chr10:116487048-116487444	rs10787680:G:T	peak45670	chr10:116487050-116487430	rs10787680:G:T	1	peak45670
peak29955	chr10:116771025-116772107	rs61874877:G:A	peak45724	chr10:116771134-116771783	rs61874877:G:A	1	peak45724
peak30279	chr10:120841779-120842252	rs12220751:A:G	peak46269	chr10:120841854-120842220	rs12220751:A:G	1	peak46269
peak30367	chr10:121976647-121977033	rs12256693:G:A	peak46440	chr10:121976681-121976973	rs78586895:C:T	0.985	peak46440
peak30457	chr10:122544521-122545003	rs12780616:C:T	peak46589	chr10:122544544-122544892	rs12780616:C:T	1	peak46589
peak30548	chr10:124012639-124013039	rs58463976:G:A	peak46811	chr10:124012649-124012995	rs4590808:C:T	0.999	peak46811
peak30631	chr10:124631780-124632886	rs897300:C:T	peak46985	chr10:124631874-124632698	rs897300:C:T	1	peak46985
peak30667	chr10:124848846-124849817	rs11245387:C:T	peak47033	chr10:124849071-124849552	rs11245387:C:T	1	peak47033
peak30672	chr10:124893364-124893754	rs35186116:A:G	peak47041	chr10:124893438-124893731	rs35186116:A:G	1	peak47041
peak30873	chr10:127866314-127867107	rs12254032:C:T	peak47493	chr10:127866443-127866963	rs12254032:C:T	1	peak47493
peak30874	chr10:127871813-127873561	rs7915701:C:T	peak47495	chr10:127872829-127873458	rs7915701:C:T	1	peak47495
peak3095	chr1:28376186-28376624	rs80119161:A:C	peak5559	chr1:28376246-28376530	rs11247793:T:C	0.998	peak5559
peak30970	chr10:128927257-128928286	rs1020591:G:C	peak47710	chr10:128927887-128928286	rs1020591:G:C	1	peak47710,peak47709
peak31000	chr10:129337403-129337810	rs958064:A:G	peak47788	chr10:129337487-129337737	rs958064:A:G	1	peak47788
peak31015	chr10:129500583-129501389	rs7098210:T:C	peak47829	chr10:129500698-129501370	rs7098210:T:C	1	peak47829
peak31025	chr10:129569567-129570579	rs80338422:C:A	peak47855	chr10:129569456-129569833	rs56223416:G:A	0.998	peak47855,peak47856
peak31225	chr10:132011063-132011404	rs72855595:T:A	peak48543	chr10:132011111-132011353	rs72855595:T:A	1	peak48543
peak31231	chr10:132113262-132114523	rs10870258:C:T	peak48564	chr10:132113291-132113594	rs10870258:C:T	1	peak48564,peak48565
peak31388	chr10:133161364-133163122	rs7918089:A:G	peak48949	chr10:133162622-133162959	rs7918089:A:G	1	peak48948,peak48949
peak31601	chr11:933137-933840	rs11246344:A:C	peak49331	chr11:933225-933659	rs7396623:G:A	0.991	peak49331
peak31685	chr11:1494672-1495027	rs10835531:G:A	peak49523	chr11:1494698-1494962	rs10835531:G:A	1	peak49523
peak31990	chr11:3790823-3791281	rs12284204:G:A	peak50028	chr11:3790863-3791127	rs34960028:C:T	0.981	peak50028
peak32010	chr11:3893167-3895480	rs10835261:T:A	peak50059	chr11:3894083-3894621	rs10835261:T:A	1	peak50058,peak50059,peak50060
peak32246	chr11:6925627-6927609	rs1491823:T:G	peak50414	chr11:6926159-6927162	rs5789491:C:CG	0.989	peak50414
peak32302	chr11:7591597-7592451	rs7942627:C:T	peak50492	chr11:7591720-7592291	rs11041465:G:A	0.992	peak50492
peak32410	chr11:8863206-8863653	rs2742545:C:G	peak50673	chr11:8863282-8863611	rs2653616:A:G	0.872	peak50673
peak32430	chr11:9103417-9104009	rs34605207:C:A	peak50703	chr11:9103550-9103979	rs34605207:C:A	1	peak50703
peak3256	chr1:30386093-30387048	rs10753326:T:C	peak5968	chr1:30386236-30386879	rs10753326:T:C	1	peak5968
peak32670	chr11:11640903-11641459	rs36014401:G:T	peak51085	chr11:11640919-11641382	rs36014401:G:T	1	peak51085
peak32676	chr11:11798673-11799329	rs140872127:G:A	peak51098	chr11:11798730-11799157	rs140872127:G:A	1	peak51098
peak32679	chr11:11816970-11817304	rs7120650:T:C	peak51102	chr11:11817009-11817287	rs10765891:G:A	0.995	peak51102
peak3270	chr1:30663233-30665018	rs1188431:G:T	peak6018	chr1:30663471-30664687	rs1188431:G:T	1	peak6018
peak3272	chr1:30684984-30686072	rs1188461:C:G	peak6025	chr1:30685189-30685864	rs10914184:A:C	0.999	peak6025
peak32839	chr11:13007935-13008530	rs4756741:T:C	peak51365	chr11:13008004-13008324	rs4756741:T:C	1	peak51365
peak32850	chr11:13140036-13141173	rs11022677:T:C	peak51385	chr11:13140301-13140783	rs10766047:T:C	0.984	peak51385,peak51386
peak32861	chr11:13297513-13298451	rs10766075:C:T	peak51400	chr11:13297639-13298405	rs6486116:A:C	0.884	peak51400
peak33031	chr11:15308778-15309899	rs4313573:G:A	peak51637	chr11:15308901-15309213	rs4313573:G:A	1	peak51637,peak51638
peak33125	chr11:16225975-16227081	rs2351958:C:A	peak51785	chr11:16226282-16226686	rs2351958:C:A	1	peak51785
peak33148	chr11:16805957-16806317	rs183358:A:G	peak51828	chr11:16805992-16806303	rs183358:A:G	1	peak51828
peak3318	chr1:30950496-30951282	rs6660431:T:C	peak6095	chr1:30950660-30951086	rs6660431:T:C	1	peak6095
peak33183	chr11:16985351-16985911	rs2353369:A:G	peak51877	chr11:16985417-16985867	rs10832707:A:C	0.999	peak51877
peak33236	chr11:17508744-17509146	rs7104083:G:A	peak51951	chr11:17508771-17509089	rs7104083:G:A	1	peak51951
peak33275	chr11:17921747-17922662	rs739916:T:G	peak52051	chr11:17921949-17922425	rs379388:C:T	0.995	peak52051
peak3333	chr1:31052371-31053250	rs143624937:G:A	peak6120	chr1:31052563-31053082	rs143624937:G:A	1	peak6120
peak33333	chr11:18411849-18412668	rs11605386:C:G	peak52133	chr11:18412084-18412530	rs4757655:T:C	0.994	peak52133
peak33342	chr11:18646598-18647000	rs35288639:A:C	peak52147	chr11:18646659-18646971	rs35288639:A:C	1	peak52147
peak33425	chr11:19557107-19558033	rs10766569:T:C	peak52275	chr11:19557206-19558003	rs10766569:T:C	1	peak52275
peak33460	chr11:19789821-19792001	rs11600637:C:A	peak52325	chr11:19789919-19791573	rs11600637:C:A	1	peak52325,peak52326
peak33482	chr11:19918954-19919786	rs716172:A:T	peak52363	chr11:19919249-19919691	rs716172:A:T	1	peak52363
peak33484	chr11:19934850-19935635	rs894558:C:T	peak52367	chr11:19934876-19935343	rs10833199:G:A	0.986	peak52367
peak33560	chr11:20612465-20612748	rs4923426:T:A	peak52486	chr11:20612473-20612754	rs4923426:T:A	1	peak52486
peak33607	chr11:21944361-21945059	rs12288521:G:T	peak52584	chr11:21944579-21944998	rs34860059:G:GA	0.992	peak52584
peak33728	chr11:24734730-24735352	rs11028129:G:A	peak52790	chr11:24734767-24735230	rs11028129:G:A	1	peak52790
peak33811	chr11:26764798-26765664	rs7127849:G:A	peak52925	chr11:26765343-26765648	rs7127849:G:A	1	peak52925
peak3383	chr1:31508975-31509782	rs10753251:G:A	peak6189	chr1:31509172-31509695	rs28759069:T:C	0.835	peak6189
peak33849	chr11:27204617-27204848	rs12421923:G:C	peak52991	chr11:27204628-27204848	rs12421923:G:C	1	peak52991
peak33855	chr11:27228265-27228732	rs7395891:G:A	peak52997	chr11:27228279-27228588	rs6484280:C:T	0.999	peak52997
peak33858	chr11:27292004-27292908	rs10767630:A:T	peak53003	chr11:27292328-27292695	rs10742172:C:T	1	peak53003
peak33993	chr11:30131555-30132097	rs1865731:A:C	peak53230	chr11:30131600-30131941	rs11030960:T:C	1	peak53230
peak33998	chr11:30292521-30292919	rs11031038:T:C	peak53242	chr11:30292560-30292868	rs11031038:T:C	1	peak53242
peak34030	chr11:30653485-30653930	rs1744419:T:C	peak53282	chr11:30653544-30653901	rs11031163:A:T	0.997	peak53282
peak34064	chr11:31246509-31246769	rs7107847:A:G	peak53335	chr11:31246503-31246762	rs7107847:A:G	1	peak53335
peak34101	chr11:31995189-31996144	rs4922884:G:C	peak53400	chr11:31995604-31996071	rs4922884:G:C	1	peak53400
peak34157	chr11:32861733-32862556	rs11032033:G:A	peak53488	chr11:32862233-32862517	rs11032034:A:C	1	peak53488
peak34331	chr11:34416232-34417212	rs2420398:C:T	peak53732	chr11:34416394-34417148	rs11032678:T:G	0.999	peak53732
peak34407	chr11:34957252-34958151	rs2956100:G:A	peak53834	chr11:34957572-34957950	rs2281809:C:T	0.992	peak53834
peak34434	chr11:35102280-35102849	rs4756190:T:C	peak53866	chr11:35102333-35102670	rs4756190:T:C	1	peak53866
peak34604	chr11:36306692-36307266	rs11606433:C:T	peak54114	chr11:36306869-36307194	rs11606433:C:T	1	peak54114
peak34688	chr11:37279364-37280286	rs61882390:T:C	peak54226	chr11:37279577-37280115	rs61882390:T:C	1	peak54226
peak34695	chr11:37411178-37411817	rs7942072:A:G	peak54239	chr11:37411320-37411675	rs7942072:A:G	1	peak54239
peak34767	chr11:39776497-39777752	rs10837259:T:G	peak54376	chr11:39776985-39777536	rs10837259:T:G	1	peak54376
peak34793	chr11:40400961-40401863	rs7933903:G:A	peak54417	chr11:40401043-40401792	rs7930863:C:T	1	peak54417
peak34884	chr11:42949766-42950349	rs11037177:C:T	peak54566	chr11:42949772-42950370	rs11037177:C:T	1	peak54566
peak34885	chr11:42950788-42951813	rs2087362:A:C	peak54567	chr11:42951257-42951615	rs10837979:G:A	0.821	peak54567
peak34902	chr11:43382693-43383759	rs10838098:G:A	peak54596	chr11:43383387-43383746	rs10838098:G:A	1	peak54596
peak35455	chr11:48058796-48059260	rs61914724:G:T	peak55459	chr11:48058810-48059202	rs61914724:G:T	1	peak55459
peak35814	chr11:58850439-58851280	rs11229664:G:A	peak56015	chr11:58850459-58851239	rs11229664:G:A	1	peak56015
peak35860	chr11:59183597-59184160	rs656163:A:G	peak56078	chr11:59183678-59184067	rs656163:A:G	1	peak56078
peak35974	chr11:60284001-60284496	rs17611079:T:C	peak56218	chr11:60284005-60284283	rs17611079:T:C	1	peak56218
peak36171	chr11:61832735-61833220	rs174574:A:C	peak56520	chr11:61832744-61833033	rs174574:A:C	1	peak56520
peak36184	chr11:61904135-61905117	rs174472:A:G	peak56545	chr11:61904506-61905039	rs174472:A:G	1	peak56545
peak36227	chr11:62324930-62325268	rs12281053:G:T	peak56603	chr11:62324942-62325225	rs11404254:C:CA	0.99	peak56603
peak36237	chr11:62398002-62398830	rs11231076:G:A	peak56614	chr11:62398031-62398562	rs11231076:G:A	1	peak56614
peak36375	chr11:63563410-63563895	rs3781605:C:T	peak56823	chr11:63563541-63563796	rs3781605:C:T	1	peak56823
peak36519	chr11:64656037-64656787	rs2269730:G:A	peak57070	chr11:64656142-64656617	rs2269730:G:A	1	peak57070
peak3690	chr1:34785284-34786082	rs476220:G:A	peak6722	chr1:34785480-34785941	rs476220:G:A	1	peak6722
peak36943	chr11:67579025-67580004	rs614080:G:A	peak57693	chr11:67579060-67579386	rs614080:G:A	1	peak57693,peak57694
peak36948	chr11:67622793-67623435	rs2126719:C:T	peak57701	chr11:67622816-67623347	rs11227866:G:A	0.986	peak57701
peak37108	chr11:68869390-68870820	rs10792001:G:C	peak57955	chr11:68869673-68870379	rs686877:G:A	0.999	peak57955,peak57956
peak37125	chr11:69010952-69011386	rs12792323:T:C	peak57994	chr11:69010972-69011353	rs12792323:T:C	1	peak57994
peak37142	chr11:69114855-69116172	rs2924545:G:A	peak58027	chr11:69114917-69115334	rs2924545:G:A	1	peak58027,peak58028
peak37270	chr11:70085403-70087020	rs2509128:C:G	peak58298	chr11:70085875-70086968	rs2509129:T:A	0.994	peak58298
peak37309	chr11:70431925-70432731	rs2298412:A:G	peak58383	chr11:70432067-70432606	rs2298412:A:G	1	peak58383
peak37375	chr11:71139477-71141001	rs72957682:T:C	peak58581	chr11:71139499-71140358	rs72957682:T:C	1	peak58581
peak37415	chr11:71480301-71481037	rs7121106:C:T	peak58661	chr11:71480673-71481033	rs12574206:G:C	0.999	peak58661
peak37672	chr11:73654577-73655204	rs36096952:C:T	peak59042	chr11:73654638-73654979	rs36096952:C:T	1	peak59042
peak37743	chr11:74617426-74618365	rs10899015:G:A	peak59148	chr11:74617590-74618204	rs35673894:A:ATATT	0.999	peak59148
peak37873	chr11:75565162-75565874	rs603647:C:T	peak59345	chr11:75565574-75565842	rs603647:C:T	1	peak59345
peak37992	chr11:76729290-76729745	rs56203693:C:T	peak59532	chr11:76729298-76729584	rs17812296:C:G	0.995	peak59532
peak38005	chr11:76773872-76774442	rs1149605:T:C	peak59550	chr11:76773947-76774380	rs881930:G:A	0.995	peak59550
peak38143	chr11:78179326-78180078	rs669010:G:A	peak59754	chr11:78179488-78180065	rs640537:A:G	0.999	peak59754
peak38279	chr11:79461068-79461764	rs6592838:G:A	peak59975	chr11:79461088-79461477	rs6592839:C:T	0.999	peak59975
peak3831	chr1:36432618-36432965	rs2282355:C:T	peak6918	chr1:36432644-36432942	rs2282355:C:T	1	peak6918
peak38318	chr11:80346389-80347331	rs72933271:C:T	peak60042	chr11:80346531-80347077	rs72933271:C:T	1	peak60042
peak38384	chr11:82216849-82217296	rs1380107:C:G	peak60141	chr11:82216939-82217293	rs1380108:G:A	0.987	peak60141
peak38433	chr11:83006819-83007405	rs1904428:C:A	peak60216	chr11:83007010-83007382	rs1904428:C:A	1	peak60216
peak38509	chr11:83897494-83897856	rs61901783:A:G	peak60314	chr11:83897575-83897817	rs61901783:A:G	1	peak60314
peak38622	chr11:86134617-86135351	rs11234552:A:G	peak60483	chr11:86134712-86135274	rs11234552:A:G	1	peak60483
peak38778	chr11:87897060-87897987	rs1939164:A:T	peak60717	chr11:87897112-87897468	rs1939164:A:T	1	peak60717
peak38793	chr11:88174621-88175995	rs302647:C:G	peak60733	chr11:88174646-88175923	rs302647:C:G	1	peak60733
peak38809	chr11:88337104-88338760	rs11019400:A:G	peak60756	chr11:88337302-88338701	rs11019400:A:G	1	peak60756
peak38874	chr11:89583575-89584297	rs11018653:T:C	peak60840	chr11:89583635-89583919	rs11018653:T:C	1	peak60840
peak38908	chr11:90309370-90311009	rs1948977:C:T	peak60881	chr11:90309709-90310048	rs1948977:C:T	1	peak60881,peak60882,peak60883
peak38925	chr11:90757788-90758648	rs10741365:T:A	peak60908	chr11:90757901-90758460	rs10741366:A:G	0.998	peak60908
peak38960	chr11:91905106-91905861	rs10501763:T:C	peak60975	chr11:91905319-91905800	rs57166101:A:G	0.997	peak60975
peak38979	chr11:92204700-92205351	rs6483169:C:T	peak61009	chr11:92204771-92205248	rs6483169:C:T	1	peak61009
peak39068	chr11:93585826-93586305	rs10831062:C:T	peak61150	chr11:93585849-93586243	rs7120590:T:C	0.916	peak61150
peak39265	chr11:95578139-95578430	rs12575636:T:G	peak61450	chr11:95578145-95578401	rs4409785:T:C	0.857	peak61450
peak3937	chr1:37995704-37997057	rs67631072:C:T	peak7167	chr1:37995834-37996922	rs61776719:C:A	0.992	peak7167
peak39430	chr11:98237913-98238206	rs2848516:A:C	peak61683	chr11:98237932-98238195	rs2509841:G:A	0.999	peak61683
peak39530	chr11:100775973-100777492	rs17095481:A:G	peak61861	chr11:100776165-100777455	rs17095481:A:G	1	peak61861
peak39568	chr11:101209065-101209697	rs11224630:G:A	peak61918	chr11:101209265-101209630	rs11224630:G:A	1	peak61918
peak39594	chr11:101552895-101554398	rs12282925:T:G	peak61956	chr11:101552981-101553239	rs12282925:T:G	1	peak61956
peak39678	chr11:102493586-102493920	rs665124:G:A	peak62091	chr11:102493599-102493900	rs665124:G:A	1	peak62091
peak3987	chr1:38941168-38942157	rs11811894:C:A	peak7269	chr1:38941438-38942083	rs11811894:C:A	1	peak7269
peak3990	chr1:38985442-38986533	rs4329504:A:G	peak7273	chr1:38985652-38986130	rs7545597:A:C	0.939	peak7273
peak39956	chr11:107157208-107158499	rs1425239:G:A	peak62453	chr11:107157431-107158218	rs1425239:G:A	1	peak62453,peak62454
peak40050	chr11:108538012-108539095	rs2640784:A:G	peak62578	chr11:108538097-108538415	rs2640784:A:G	1	peak62578,peak62579
peak40182	chr11:110373208-110373764	rs10488763:A:T	peak62761	chr11:110373480-110373733	rs1443120:C:G	1	peak62761
peak40205	chr11:110598422-110600908	rs624336:T:G	peak62796	chr11:110600192-110600799	rs624336:T:G	1	peak62796
peak40246	chr11:111269305-111269919	rs10891240:A:G	peak62853	chr11:111269538-111269848	rs10891240:A:G	1	peak62853
peak40250	chr11:111291831-111292100	rs10789822:A:G	peak62858	chr11:111291839-111292100	rs10789822:A:G	1	peak62858
peak40389	chr11:112166537-112167017	rs11214105:G:A	peak63061	chr11:112166552-112166954	rs1293344:A:G	0.998	peak63061
peak40738	chr11:116217000-116217369	rs4938234:C:T	peak63695	chr11:116217076-116217349	rs4938234:C:T	1	peak63695
peak40742	chr11:116339235-116340064	rs4938263:A:G	peak63711	chr11:116339290-116339699	rs4938263:A:G	1	peak63711
peak40788	chr11:116809433-116809828	rs1263171:G:A	peak63805	chr11:116809512-116809777	rs1263172:G:A	0.841	peak63805
peak41026	chr11:118678790-118680182	rs2277297:C:T	peak64227	chr11:118678905-118679996	rs2277296:T:C	1	peak64227
peak41027	chr11:118689486-118690722	rs73001406:G:A	peak64228	chr11:118689531-118690656	rs140077459:G:GC	0.979	peak64228
peak41257	chr11:120622275-120622940	rs4936532:A:G	peak64659	chr11:120622554-120622839	rs4936532:A:G	1	peak64659
peak41440	chr11:122607200-122607518	rs10790512:A:G	peak64955	chr11:122607204-122607505	rs10790512:A:G	1	peak64955
peak41550	chr11:123822075-123822982	rs11826594:T:A	peak65130	chr11:123822084-123822417	rs11826594:T:A	1	peak65130,peak65131
peak41592	chr11:124536410-124537018	rs4595558:G:C	peak65192	chr11:124536505-124536967	rs4595558:G:C	1	peak65192
peak41594	chr11:124556686-124557486	rs10790697:T:C	peak65194	chr11:124556877-124557128	rs5006457:T:A	0.999	peak65194
peak41638	chr11:124944492-124944947	rs7937392:A:T	peak65255	chr11:124944587-124944912	rs7941040:G:A	1	peak65255
peak4166	chr1:40341851-40342637	rs442418:T:C	peak7505	chr1:40342044-40342374	rs442418:T:C	1	peak7505
peak41731	chr11:126082055-126082513	rs651054:T:C	peak65424	chr11:126082093-126082437	rs583194:A:G	0.997	peak65424
peak41734	chr11:126102197-126103148	rs61918992:G:A	peak65429	chr11:126102403-126102966	rs4448703:C:T	0.987	peak65429
peak41747	chr11:126190759-126191339	rs587165:C:T	peak65457	chr11:126190773-126191138	rs562361:A:T	0.999	peak65457
peak41868	chr11:127609401-127609803	rs356236:A:G	peak65690	chr11:127609454-127609766	rs356236:A:G	1	peak65690
peak42	chr1:975842-976578	rs7417106:A:G	peak55	chr1:975977-976396	rs7417106:A:G	1	peak55
peak42101	chr11:129344370-129345101	rs34381789:G:A	peak66011	chr11:129344382-129344974	rs34381789:G:A	1	peak66011
peak42127	chr11:129731309-129731874	rs691955:G:C	peak66065	chr11:129731348-129731731	rs492335:G:A	0.985	peak66065
peak42329	chr11:132028486-132029024	rs534765:T:A	peak66467	chr11:132028633-132028986	rs534770:T:C	1	peak66467
peak42423	chr11:133113478-133113919	rs4405324:T:G	peak66629	chr11:133113525-133113808	rs4405324:T:G	1	peak66629
peak42522	chr11:134266766-134267294	rs10791351:T:C	peak66825	chr11:134266897-134267194	rs10791351:T:C	1	peak66825
peak42574	chr11:134710579-134711444	rs80051554:T:G	peak66942	chr11:134710691-134711366	rs80051554:T:G	1	peak66942
peak42580	chr11:134741730-134743657	rs10894863:C:T	peak66956	chr11:134742246-134742539	rs11223982:G:A	0.816	peak66956,peak66957,peak66955
peak42693	chr12:609628-611169	rs10849333:G:T	peak67162	chr12:609738-610886	rs10849333:G:T	1	peak67162
peak42695	chr12:617224-618238	rs11615697:G:A	peak67165	chr12:617326-617942	rs7135801:C:A	0.999	peak67165
peak42699	chr12:630548-631592	rs34038797:C:G	peak67169	chr12:630635-630947	rs34038797:C:G	1	peak67169
peak42702	chr12:642354-644204	rs61916675:A:G	peak67172	chr12:642534-643507	rs61916675:A:G	1	peak67172
peak42979	chr12:3083618-3084578	rs4766042:C:T	peak67645	chr12:3083908-3084402	rs11062495:C:G	0.979	peak67645
peak42991	chr12:3122589-3123497	rs73048180:C:T	peak67659	chr12:3122895-3123257	rs73048180:C:T	1	peak67659
peak43039	chr12:3326990-3327860	rs1005375:T:C	peak67737	chr12:3327412-3327770	rs1005375:T:C	1	peak67737
peak43230	chr12:6057549-6058119	rs61233936:G:C	peak68108	chr12:6057595-6058109	chr12:6058199:AG:A:AG:A	0.989	peak68108
peak43605	chr12:9283306-9285006	rs6487748:A:G	peak68622	chr12:9283352-9284089	rs61916193:C:T	0.999	peak68622,peak68623
peak43650	chr12:9751345-9751651	rs3176806:C:A	peak68690	chr12:9751384-9751619	rs3176806:C:A	1	peak68690
peak43870	chr12:12087645-12088591	rs11054676:A:C	peak68959	chr12:12088099-12088528	rs11054675:C:T	1	peak68959
peak43903	chr12:12312827-12313341	rs4763807:G:A	peak68999	chr12:12313065-12313319	rs4763806:T:A	0.913	peak68999
peak43932	chr12:12456468-12457345	rs60363317:G:A	peak69041	chr12:12456703-12457022	rs60363317:G:A	1	peak69041
peak43981	chr12:12799353-12799998	rs12318909:C:T	peak69107	chr12:12799617-12799941	rs10845633:A:G	1	peak69107
peak44011	chr12:13024192-13024970	rs4763314:T:A	peak69145	chr12:13024635-13024920	rs7956248:C:A	0.99	peak69145,peak69144
peak44159	chr12:14741036-14742355	rs6488708:G:A	peak69345	chr12:14741176-14741530	rs6488708:G:A	1	peak69345,peak69346
peak44316	chr12:16189833-16190380	rs3915244:C:T	peak69568	chr12:16189910-16190192	rs3864919:A:C	0.999	peak69568
peak44430	chr12:18644499-18644964	rs11044233:C:T	peak69767	chr12:18644574-18644943	rs10505827:T:G	0.989	peak69767
peak44664	chr12:21559794-21560609	rs1871134:C:G	peak70117	chr12:21559863-21560579	rs1871139:A:G	0.999	peak70117
peak44786	chr12:22759612-22760680	rs10842064:G:A	peak70261	chr12:22759896-22760637	rs10842064:G:A	1	peak70261
peak44819	chr12:23484231-23484606	rs1444694:T:C	peak70313	chr12:23484298-23484587	rs1444694:T:C	1	peak70313
peak44887	chr12:24550759-24551935	rs16927698:G:A	peak70404	chr12:24551244-24551784	rs16927697:A:G	0.999	peak70404
peak44925	chr12:25040222-25041636	rs7295158:C:T	peak70449	chr12:25040651-25041243	rs7295158:C:T	1	peak70449
peak44943	chr12:25240894-25241955	rs12813551:C:T	peak70473	chr12:25241639-25241889	rs12813551:C:T	1	peak70473
peak45061	chr12:26647919-26648453	rs2170640:T:C	peak70620	chr12:26648050-26648394	rs2170640:T:C	1	peak70620
peak45070	chr12:26668795-26669212	rs78262669:G:C	peak70630	chr12:26668889-26669171	rs78262669:G:C	1	peak70630
peak45162	chr12:27344102-27344981	rs11048977:G:A	peak70738	chr12:27344209-27344622	rs11048977:G:A	1	peak70738
peak45198	chr12:27636803-27637121	rs7132511:G:A	peak70794	chr12:27636842-27637118	rs2346755:C:T	1	peak70794
peak45204	chr12:27696446-27698048	rs7977232:T:C	peak70803	chr12:27697658-27697968	rs7977232:T:C	1	peak70803
peak45287	chr12:29241717-29242789	rs7958210:G:C	peak70913	chr12:29241870-29242653	rs7958210:G:C	1	peak70913
peak45385	chr12:30822151-30823713	rs7134911:C:A	peak71074	chr12:30822315-30823488	rs7134911:C:A	1	peak71074
peak45498	chr12:31872809-31873436	rs1313542:T:C	peak71231	chr12:31872933-31873424	rs1313542:T:C	1	peak71231
peak4552	chr1:44090458-44091014	rs72884281:G:C	peak8158	chr1:44090455-44090770	rs72884281:G:C	1	peak8158
peak45540	chr12:32302239-32302605	rs3844105:T:C	peak71279	chr12:32302294-32302571	rs149268060:ATCC:A	0.99	peak71279
peak45543	chr12:32319503-32319905	rs58926489:G:A	peak71281	chr12:32319530-32319780	rs10844183:G:A	0.999	peak71281
peak45574	chr12:32515146-32515783	rs61928965:T:C	peak71320	chr12:32515229-32515734	rs10506093:G:A	0.998	peak71320
peak45643	chr12:33786338-33787081	rs1825746:C:T	peak71427	chr12:33786575-33786886	rs1825746:C:T	1	peak71427
peak45648	chr12:33882697-33883161	rs11052979:G:T	peak71438	chr12:33882711-33883011	rs11052979:G:T	1	peak71438
peak45736	chr12:39144590-39145828	rs4768587:C:T	peak71606	chr12:39144673-39145751	rs11372875:A:AG	0.997	peak71606
peak45827	chr12:40163282-40164060	rs2638254:C:T	peak71734	chr12:40163308-40163781	rs2708473:A:G	0.986	peak71734
peak45828	chr12:40165202-40165641	rs2708481:T:C	peak71735	chr12:40165245-40165542	rs2708479:A:G	1	peak71735
peak45856	chr12:40390627-40391643	rs2081701:C:T	peak71765	chr12:40390711-40391203	rs4280068:T:C	1	peak71765
peak45917	chr12:41604725-41606416	rs903669:T:C	peak71839	chr12:41604802-41605100	rs903669:T:C	1	peak71839,peak71840,peak71841
peak45922	chr12:41685044-41685367	rs7964051:C:A	peak71846	chr12:41685071-41685343	rs7964051:C:A	1	peak71846
peak45931	chr12:41893182-41894481	rs2109531:A:G	peak71862	chr12:41894084-41894428	rs2109531:A:G	1	peak71862,peak71861
peak45973	chr12:42330482-42330927	rs12229735:A:G	peak71921	chr12:42330499-42330865	rs11181429:G:A	1	peak71921
peak46131	chr12:45543470-45544245	rs1806689:A:C	peak72150	chr12:45543832-45544222	rs2897908:A:C	0.891	peak72150
peak46145	chr12:45708322-45708708	rs10880847:T:C	peak72167	chr12:45708424-45708692	rs10880848:C:T	1	peak72167
peak46312	chr12:47188578-47189519	rs10881068:T:C	peak72397	chr12:47188666-47189416	rs10881068:T:C	1	peak72397
peak46343	chr12:47377305-47378589	rs2074193:T:G	peak72433	chr12:47377400-47378554	rs2074193:T:G	1	peak72433
peak46553	chr12:49515158-49515616	rs12322561:A:G	peak72738	chr12:49515251-49515582	rs12322561:A:G	1	peak72738
peak46812	chr12:51846874-51849828	rs641421:C:G	peak73132	chr12:51848389-51849678	rs641421:C:G	1	peak73132
peak46814	chr12:51863303-51864644	rs10876214:T:C	peak73134	chr12:51863412-51864470	rs10876214:T:C	1	peak73134
peak46952	chr12:52884288-52885336	rs61927887:T:G	peak73407	chr12:52884497-52885284	rs9668670:T:A	0.995	peak73407
peak47391	chr12:56914665-56915691	rs11172056:T:C	peak74081	chr12:56914738-56915116	rs10783812:T:C	0.99	peak74081,peak74082
peak47756	chr12:62005590-62006507	rs11174276:G:A	peak74621	chr12:62005680-62005952	rs11174276:G:A	1	peak74621
peak47794	chr12:62481724-62482154	rs73139098:A:G	peak74671	chr12:62481784-62482121	rs73139098:A:G	1	peak74671
peak47812	chr12:62688823-62689582	rs342168:G:A	peak74697	chr12:62689121-62689438	rs342167:C:T	0.993	peak74697
peak47815	chr12:62728553-62729362	rs7970056:C:T	peak74704	chr12:62728623-62729106	rs11174621:T:A	0.999	peak74704
peak47821	chr12:62760314-62761389	rs12424525:G:C	peak74711	chr12:62760584-62761097	rs12424525:G:C	1	peak74711
peak47823	chr12:62762487-62763489	rs71465167:G:A	peak74713	chr12:62762618-62763000	rs71465167:G:A	1	peak74713
peak47873	chr12:63220885-63221316	rs11174871:A:G	peak74778	chr12:63220910-63221291	rs11174871:A:G	1	peak74778
peak47925	chr12:63989529-63990041	rs3741607:T:C	peak74846	chr12:63989582-63989870	rs3741606:A:G	0.866	peak74846
peak47969	chr12:64633774-64634733	rs11175480:G:A	peak74906	chr12:64633904-64634387	rs61931629:G:A	0.985	peak74906
peak48012	chr12:64900398-64900986	rs12231352:G:C	peak74959	chr12:64900522-64900919	rs12231352:G:C	1	peak74959
peak48216	chr12:68001377-68002413	rs2906859:T:C	peak75216	chr12:68001603-68001868	rs2906859:T:C	1	peak75216,peak75217
peak48368	chr12:69123413-69124562	rs7971167:C:T	peak75406	chr12:69124009-69124474	rs7971167:C:T	1	peak75406
peak48369	chr12:69128867-69129358	rs7963308:G:A	peak75407	chr12:69129100-69129324	rs7963079:G:A	0.995	peak75407
peak48391	chr12:69337962-69338779	rs4761234:T:C	peak75438	chr12:69338112-69338702	rs4761234:T:C	1	peak75438
peak48400	chr12:69359332-69360606	rs11177615:G:A	peak75447	chr12:69359533-69360512	rs2249093:G:C	0.817	peak75447
peak48440	chr12:69840450-69841482	rs12369426:G:A	peak75508	chr12:69840682-69841287	rs7963055:T:C	0.999	peak75508
peak48618	chr12:71980381-71981613	rs7309686:G:A	peak75752	chr12:71980571-71981482	rs6582078:G:T	0.999	peak75752
peak48632	chr12:72278883-72279348	rs4584622:C:T	peak75782	chr12:72278918-72279298	rs4584622:C:T	1	peak75782
peak48864	chr12:76239930-76240810	rs12422809:T:C	peak76156	chr12:76240239-76240654	rs12422809:T:C	1	peak76156
peak48957	chr12:77599835-77600828	rs11105857:A:C	peak76294	chr12:77599835-77600138	rs11105857:A:C	1	peak76294
peak4909	chr1:47934118-47935582	rs17425924:C:T	peak8704	chr1:47934231-47934876	rs17425924:C:T	1	peak8704,peak8705
peak49582	chr12:89280702-89281633	rs2126606:T:C	peak77191	chr12:89280885-89281496	rs2126606:T:C	1	peak77191
peak4969	chr1:48670256-48671303	rs16873:A:G	peak8801	chr1:48670262-48670770	rs454938:G:C	0.993	peak8801,peak8802
peak4970	chr1:48671406-48672293	rs403069:T:C	peak8803	chr1:48671597-48671993	rs10888610:G:A	0.989	peak8803,peak8804
peak49841	chr12:92188510-92189296	rs12371711:C:T	peak77505	chr12:92188538-92189105	rs1631261:T:C	0.996	peak77505
peak49888	chr12:92530541-92531340	rs1515555:G:A	peak77563	chr12:92530711-92531136	rs1515556:T:C	0.996	peak77563
peak49919	chr12:92769114-92769859	rs17790334:A:G	peak77594	chr12:92769457-92769808	rs17790334:A:G	1	peak77594
peak50124	chr12:94551799-94552768	rs12580093:T:C	peak77863	chr12:94551831-94552401	rs12580093:T:C	1	peak77863
peak50165	chr12:94795218-94796001	rs10444520:G:A	peak77914	chr12:94795492-94795882	rs12828097:C:G	1	peak77914
peak50190	chr12:95116925-95119025	rs10777668:C:T	peak77951	chr12:95117163-95118743	rs10777668:C:T	1	peak77951
peak50699	chr12:101615718-101616587	rs825085:C:A	peak78665	chr12:101616004-101616473	rs825085:C:A	1	peak78665
peak50701	chr12:101619930-101620919	rs7138213:A:G	peak78667	chr12:101620126-101620639	rs59087862:A:G	0.974	peak78667
peak50738	chr12:101891296-101892047	rs7138541:A:G	peak78710	chr12:101891506-101891943	rs7138541:A:G	1	peak78710
peak50801	chr12:102680067-102681240	rs17444030:C:T	peak78801	chr12:102680183-102680836	rs17444030:C:T	1	peak78801
peak50879	chr12:103626481-103627493	rs703618:G:A	peak78918	chr12:103626546-103626866	rs831684:T:C	0.978	peak78918
peak51045	chr12:105192655-105193020	rs11112403:A:G	peak79151	chr12:105192692-105192974	rs11112403:A:G	1	peak79151
peak51113	chr12:106069917-106071013	rs3782690:T:G	peak79259	chr12:106070102-106070539	rs3782690:T:G	1	peak79259,peak79260
peak51132	chr12:106122004-106122493	rs2916097:A:G	peak79281	chr12:106122052-106122402	rs2916097:A:G	1	peak79281
peak51259	chr12:107670846-107671553	rs11113431:G:A	peak79479	chr12:107670948-107671406	rs11113431:G:A	1	peak79479
peak51360	chr12:108773560-108774765	rs11114053:C:T	peak79641	chr12:108773668-108774297	rs11114051:T:C	0.967	peak79641,peak79642
peak51411	chr12:109119035-109119340	rs246084:A:G	peak79713	chr12:109119106-109119332	rs246084:A:G	1	peak79713
peak51431	chr12:109197102-109198823	rs2268390:T:C	peak79741	chr12:109197123-109197804	rs2268390:T:C	1	peak79741
peak51628	chr12:110456623-110456987	rs11065647:G:A	peak80052	chr12:110456637-110456904	rs11065647:G:A	1	peak80052
peak51635	chr12:110537392-110538357	rs6606689:T:C	peak80061	chr12:110537564-110538289	rs6606689:T:C	1	peak80061
peak520	chr1:5877033-5877471	rs17432065:C:T	peak1203	chr1:5877048-5877387	rs3747990:C:T	0.993	peak1203
peak52032	chr12:114925076-114926155	rs3914956:T:A	peak80773	chr12:114925126-114925437	rs7976673:A:T	0.953	peak80773,peak80774
peak52075	chr12:115467920-115468639	rs4767319:G:T	peak80846	chr12:115467960-115468511	rs4767319:G:T	1	peak80846
peak52189	chr12:116635432-116638085	rs12812309:G:A	peak81013	chr12:116635584-116636296	rs12297565:A:G	0.97	peak81013
peak52217	chr12:116888821-116889694	rs7294919:T:C	peak81052	chr12:116888965-116889544	rs12311895:T:C	0.999	peak81052
peak52275	chr12:117487003-117487932	rs1093309:T:C	peak81162	chr12:117487255-117487741	rs1093309:T:C	1	peak81162
peak52393	chr12:119593992-119595607	rs2711748:G:T	peak81370	chr12:119594342-119595424	rs2711748:G:T	1	peak81370
peak52397	chr12:119618314-119619050	rs7955119:C:T	peak81375	chr12:119618342-119618884	rs7138221:C:G	0.968	peak81375
peak52736	chr12:122113674-122114664	rs28545660:C:T	peak81854	chr12:122113971-122114598	rs28450064:T:C	0.996	peak81854
peak52774	chr12:122371516-122372247	rs10773103:A:G	peak81903	chr12:122371599-122372121	rs10773104:G:A	0.999	peak81903
peak52842	chr12:122966010-122966954	rs61955196:G:C	peak81997	chr12:122966053-122966867	rs61955196:G:C	1	peak81997
peak53071	chr12:124740605-124741248	rs921921:A:G	peak82369	chr12:124740649-124741167	rs921921:A:G	1	peak82369
peak53094	chr12:124833624-124834004	rs10846749:G:C	peak82405	chr12:124833701-124833996	rs10846748:C:T	0.976	peak82405
peak53351	chr12:128957662-128958790	rs6486740:A:G	peak82940	chr12:128957732-128958477	rs1795672:G:A	0.998	peak82940
peak53353	chr12:128973703-128974902	rs76571605:T:C	peak82944	chr12:128973913-128974821	rs56333336:G:C	0.913	peak82944
peak53418	chr12:130281144-130281645	rs10848064:C:T	peak83139	chr12:130281197-130281505	rs10848064:C:T	1	peak83139
peak53502	chr12:131090401-131091101	rs4759841:T:G	peak83351	chr12:131090637-131091070	rs4759841:T:G	1	peak83351
peak53518	chr12:131234515-131235265	rs10848320:T:C	peak83400	chr12:131234790-131235093	rs530308418:G:C	0.965	peak83400
peak53547	chr12:131454576-131455192	rs9300296:C:G	peak83487	chr12:131454712-131455069	rs10466895:T:G	0.998	peak83487
peak53581	chr12:131793703-131794181	rs10902450:G:A	peak83577	chr12:131793747-131794094	rs10902450:G:A	1	peak83577
peak53589	chr12:131851078-131852238	rs7487262:G:A	peak83596	chr12:131851896-131852192	rs10751704:T:G	0.995	peak83595,peak83596
peak53846	chr13:20175921-20176492	rs4769970:C:G	peak84154	chr13:20175960-20176267	rs7330666:G:A	0.998	peak84154
peak53971	chr13:21281928-21282700	rs261405:T:A	peak84352	chr13:21282098-21282464	rs261405:T:A	1	peak84352
peak53975	chr13:21325815-21327030	rs4770132:A:G	peak84358	chr13:21326050-21326694	rs4770132:A:G	1	peak84358,peak84359
peak54016	chr13:21884938-21885598	rs17073099:A:T	peak84430	chr13:21885031-21885526	rs17073099:A:T	1	peak84430
peak54147	chr13:23778780-23779375	rs7322274:T:C	peak84678	chr13:23778828-23779297	rs7322274:T:C	1	peak84678
peak54184	chr13:24096652-24097630	rs1022826:C:G	peak84748	chr13:24097093-24097487	rs1022826:C:G	1	peak84748
peak54185	chr13:24106423-24107030	rs7318560:G:A	peak84750	chr13:24106448-24106854	rs7318560:G:A	1	peak84750
peak54189	chr13:24147201-24148095	rs4769327:C:A	peak84758	chr13:24147285-24147943	rs9318347:A:G	1	peak84758
peak54209	chr13:24212282-24213162	rs17364832:T:G	peak84787	chr13:24212364-24213157	rs7333647:T:C	0.92	peak84787
peak54278	chr13:25017830-25019114	rs4581558:A:G	peak84925	chr13:25017909-25019025	rs4429160:G:A	0.975	peak84925
peak54332	chr13:26148684-26149034	rs7327712:C:T	peak85042	chr13:26148698-26149008	rs7327712:C:T	1	peak85042
peak54371	chr13:26628331-26629812	rs2839908:C:A	peak85098	chr13:26628679-26629076	rs2839908:C:A	1	peak85098
peak54431	chr13:27201522-27202040	rs9512577:T:G	peak85208	chr13:27201682-27202053	rs9512577:T:G	1	peak85208
peak54491	chr13:27712453-27712753	rs4771157:C:T	peak85295	chr13:27712469-27712721	rs4771157:C:T	1	peak85295
peak54499	chr13:27829755-27830442	rs1778780:T:G	peak85309	chr13:27829775-27830347	rs1778780:T:G	1	peak85309
peak54633	chr13:28954373-28955536	rs619708:C:T	peak85476	chr13:28954540-28955365	rs619708:C:T	1	peak85476
peak54648	chr13:29131334-29132646	rs4590984:C:G	peak85501	chr13:29131612-29132212	rs4590984:C:G	1	peak85501,peak85502
peak5465	chr1:54888354-54888777	rs125034:A:G	peak9669	chr1:54888412-54888721	rs4927176:C:T	0.988	peak9669
peak54756	chr13:30360489-30360952	rs2185009:A:G	peak85673	chr13:30360561-30360922	rs2152945:A:C	0.861	peak85673
peak54797	chr13:30647476-30649091	rs11617748:T:G	peak85727	chr13:30648303-30648905	rs11617748:T:G	1	peak85727
peak54814	chr13:30745994-30746741	rs9506352:G:A	peak85752	chr13:30746097-30746709	rs17238787:GC:G	0.999	peak85752
peak54860	chr13:31191551-31192323	rs1407990:C:T	peak85824	chr13:31191732-31192210	rs1407990:C:T	1	peak85824
peak55061	chr13:33369112-33369419	rs7317420:T:C	peak86125	chr13:33369127-33369399	rs7317420:T:C	1	peak86125
peak55087	chr13:33728341-33729241	rs4943138:C:T	peak86166	chr13:33728372-33729101	rs4943138:C:T	1	peak86166
peak55439	chr13:39810609-39811612	rs9566478:T:C	peak86732	chr13:39811022-39811444	rs9566478:T:C	1	peak86732
peak5601	chr1:56489664-56491011	rs4912303:T:C	peak9854	chr1:56489823-56490915	rs4912303:T:C	1	peak9854
peak56066	chr13:46121711-46123775	rs17522766:G:A	peak87665	chr13:46121770-46122141	rs17522766:G:A	1	peak87665
peak56091	chr13:46288960-46290910	rs7320490:T:C	peak87694	chr13:46289405-46289873	rs7320490:T:C	1	peak87694
peak56142	chr13:46675224-46676628	rs4245340:A:G	peak87766	chr13:46675563-46675940	rs4245340:A:G	1	peak87766,peak87767
peak56211	chr13:48059952-48060976	rs56399021:C:T	peak87871	chr13:48059980-48060326	rs56399021:C:T	1	peak87871
peak56388	chr13:49559946-49561367	rs12146924:T:C	peak88087	chr13:49560282-49560643	rs12146924:T:C	1	peak88087,peak88088
peak56403	chr13:49669610-49670268	rs9535292:T:C	peak88112	chr13:49669754-49670078	rs9535292:T:C	1	peak88112
peak56550	chr13:51080241-51080893	rs9535573:A:G	peak88287	chr13:51080281-51080899	rs9535573:A:G	1	peak88287
peak56672	chr13:51978691-51979507	rs747781:C:T	peak88465	chr13:51978763-51979391	rs747781:C:T	1	peak88465
peak56719	chr13:52599168-52600663	rs9526950:C:A	peak88518	chr13:52599629-52600601	rs9526950:C:A	1	peak88518
peak56810	chr13:54686913-54687602	rs1478649:A:G	peak88653	chr13:54687143-54687535	rs1478650:C:T	1	peak88653
peak5711	chr1:57269551-57270329	rs663234:C:G	peak10013	chr1:57269747-57270209	rs663234:C:G	1	peak10013
peak5759	chr1:58432720-58433843	rs6587814:C:T	peak10090	chr1:58432821-58433669	rs72669853:C:T	0.996	peak10090
peak57603	chr13:72536343-72537852	rs4885010:C:T	peak89754	chr13:72536619-72537748	rs35519826:C:CA	0.867	peak89754
peak57635	chr13:73194099-73194689	rs7998829:A:G	peak89793	chr13:73194246-73194669	rs11435941:T:TC	0.979	peak89793
peak57781	chr13:75151075-75151445	rs7990766:T:C	peak89979	chr13:75151099-75151450	rs7990766:T:C	1	peak89979
peak57991	chr13:77359195-77359751	rs1927412:A:G	peak90247	chr13:77359246-77359587	rs1927412:A:G	1	peak90247
peak58324	chr13:82522526-82523477	rs4255682:C:T	peak90729	chr13:82522717-82523192	rs4255682:C:T	1	peak90729
peak58330	chr13:82663977-82664581	rs80018375:G:A	peak90736	chr13:82664242-82664525	rs80018375:G:A	1	peak90736
peak5842	chr1:59169753-59170087	rs658956:G:T	peak10195	chr1:59169759-59170065	rs11207414:G:T	0.846	peak10195
peak58473	chr13:86986282-86987005	rs8000914:T:C	peak90983	chr13:86986402-86986852	rs8000914:T:C	1	peak90983
peak58486	chr13:87331123-87331600	rs6491325:G:A	peak91003	chr13:87331151-87331579	rs6491325:G:A	1	peak91003
peak58488	chr13:87336249-87337057	rs117494923:G:A	peak91006	chr13:87336307-87336929	rs117494923:G:A	1	peak91006
peak58565	chr13:89486587-89487372	rs657998:T:C	peak91107	chr13:89486797-89487066	rs657998:T:C	1	peak91107
peak58587	chr13:90293877-90294329	rs2882443:G:A	peak91155	chr13:90293959-90294238	rs2882443:G:A	1	peak91155
peak58728	chr13:93454438-93455290	rs56247101:A:G	peak91375	chr13:93454691-93455204	rs55780901:C:T	0.995	peak91375
peak58729	chr13:93466216-93466998	rs895194:G:A	peak91376	chr13:93466515-93466893	rs974542:G:A	0.99	peak91376
peak58747	chr13:93800363-93800703	rs9524224:A:G	peak91406	chr13:93800384-93800671	rs9524224:A:G	1	peak91406
peak58810	chr13:94585478-94586090	rs9590039:T:C	peak91491	chr13:94585566-94585994	rs9590039:T:C	1	peak91491
peak58815	chr13:94604423-94604764	rs6492720:T:C	peak91497	chr13:94604447-94604728	rs6492720:T:C	1	peak91497
peak58863	chr13:95192752-95193927	rs4148481:G:A	peak91557	chr13:95192947-95193885	rs4148481:G:A	1	peak91557
peak58884	chr13:95319515-95320329	rs12861243:G:A	peak91586	chr13:95319555-95319867	rs12861243:G:A	1	peak91586
peak58971	chr13:96983953-96984709	rs9556648:C:G	peak91749	chr13:96984010-96984561	rs9556648:C:G	1	peak91749
peak59132	chr13:98266060-98267845	rs9584785:G:A	peak91997	chr13:98266076-98266675	rs1048034:G:T	0.962	peak91997
peak59161	chr13:98428432-98429420	rs3825435:A:G	peak92052	chr13:98428587-98429002	rs3825435:A:G	1	peak92052,peak92053
peak59188	chr13:98547403-98548000	rs9517343:C:T	peak92103	chr13:98547430-98547827	rs9517343:C:T	1	peak92103
peak59251	chr13:98976327-98976680	rs2031447:A:G	peak92203	chr13:98976338-98976637	rs2390130:G:T	0.999	peak92203
peak59255	chr13:99008511-99009506	rs72651870:C:T	peak92209	chr13:99008623-99008924	rs72651870:C:T	1	peak92209
peak59574	chr13:101749606-101750280	rs9513942:G:A	peak92685	chr13:101749672-101749972	rs9513942:G:A	1	peak92685
peak59652	chr13:102721746-102722250	rs9518820:A:G	peak92804	chr13:102721797-102722199	rs9518820:A:G	1	peak92804
peak59653	chr13:102724665-102725612	rs9554894:A:C	peak92805	chr13:102724821-102725545	rs9554894:A:C	1	peak92805
peak59721	chr13:103731622-103732397	rs1274747:A:G	peak92898	chr13:103731935-103732339	rs1274747:A:G	1	peak92898
peak59793	chr13:105774660-105775675	rs4238245:G:A	peak93011	chr13:105774790-105775404	rs4238245:G:A	1	peak93011
peak59884	chr13:106985940-106987931	rs4312172:C:T	peak93171	chr13:106987425-106987754	rs4312172:C:T	1	peak93170,peak93171
peak59895	chr13:107121831-107122803	rs11619097:A:C	peak93191	chr13:107121858-107122227	rs11618055:T:C	0.998	peak93191
peak59955	chr13:108283149-108283479	rs16972220:G:A	peak93275	chr13:108283187-108283433	rs16972222:A:G	0.988	peak93275
peak59956	chr13:108304034-108305033	rs1224150:C:T	peak93276	chr13:108304138-108304980	rs1224146:T:A	0.999	peak93276
peak59978	chr13:108704961-108705535	rs1926531:C:G	peak93309	chr13:108705055-108705492	rs9520969:A:C	0.998	peak93309
peak60059	chr13:109727252-109727711	rs9583418:G:A	peak93440	chr13:109727274-109727648	rs9587972:C:T	0.998	peak93440
peak60061	chr13:109742426-109743000	rs6492223:A:G	peak93445	chr13:109742628-109742967	rs11842277:G:A	0.858	peak93445
peak60081	chr13:109868559-109870320	rs336257:C:G	peak93481	chr13:109869091-109870231	rs336257:C:G	1	peak93481
peak60085	chr13:109919423-109920190	rs7323507:C:T	peak93489	chr13:109919755-109920101	rs7323507:C:T	1	peak93489
peak60202	chr13:110540849-110541950	rs9521826:A:G	peak93683	chr13:110540939-110541877	rs2477911:G:A	0.977	peak93683
peak60211	chr13:110600147-110601262	rs4773227:G:A	peak93696	chr13:110600147-110600872	rs2391844:G:T	0.997	peak93696
peak60244	chr13:110826554-110827781	rs4773257:A:G	peak93751	chr13:110826646-110827588	rs56384710:G:T	0.992	peak93751
peak60249	chr13:110885361-110886509	rs75533516:T:G	peak93762	chr13:110885999-110886274	rs75533516:T:G	1	peak93761,peak93762
peak60412	chr13:112697659-112698869	rs914020:C:G	peak94181	chr13:112697729-112698625	rs282587:G:A	0.998	peak94181
peak60462	chr13:112984849-112986017	rs9549623:G:A	peak94273	chr13:112984902-112985667	rs9577407:G:A	0.992	peak94273,peak94274
peak60470	chr13:113022720-113024402	rs7991797:C:T	peak94290	chr13:113023683-113024207	rs7991797:C:T	1	peak94289,peak94290
peak60486	chr13:113137676-113138257	rs3211764:G:C	peak94337	chr13:113137932-113138216	rs3211764:G:C	1	peak94337
peak60816	chr14:20730914-20731318	rs7141852:C:G	peak94875	chr14:20730955-20731261	rs7141655:C:T	0.974	peak94875
peak6089	chr1:62131113-62131571	rs11207905:C:G	peak10541	chr1:62131162-62131436	rs11207905:C:G	1	peak10541
peak60931	chr14:21902454-21903309	rs35680240:T:C	peak95040	chr14:21902646-21902858	rs28465143:G:A	0.929	peak95040
peak61134	chr14:23563583-23564037	rs2281680:C:T	peak95325	chr14:23563592-23564011	rs2281680:C:T	1	peak95325
peak61155	chr14:23689508-23690448	rs55899101:A:G	peak95354	chr14:23689543-23690432	chr14:23689844:CTGCAGAACAGCAAATAT:C:CTGCAGAACAGCAAATAT:C	0.918	peak95354
peak61156	chr14:23694201-23696073	rs79153582:T:G	peak95356	chr14:23695118-23695774	rs146833929:CCACATT:C	0.984	peak95356
peak61254	chr14:24402269-24402874	rs11621792:C:T	peak95502	chr14:24402389-24402792	rs11621792:C:T	1	peak95502
peak61278	chr14:24630691-24631501	rs6573910:C:T	peak95533	chr14:24630753-24631326	rs2236337:T:C	0.961	peak95533
peak61399	chr14:26808208-26808893	rs2273615:G:A	peak95706	chr14:26808422-26808749	rs2273615:G:A	1	peak95706
peak6149	chr1:62844079-62844361	rs4448545:G:A	peak10620	chr1:62844086-62844323	rs11208045:A:G	0.996	peak10620
peak6150	chr1:62869370-62870440	rs7555606:A:G	peak10621	chr1:62869419-62869691	rs11208049:G:A	0.999	peak10621
peak61743	chr14:32473218-32474144	rs3784196:A:G	peak96218	chr14:32473462-32474034	rs941750:T:G	0.999	peak96218
peak6186	chr1:63612265-63613204	rs1884467:A:G	peak10662	chr1:63612608-63612918	rs1884467:A:G	1	peak10662
peak61868	chr14:34251614-34252105	rs12879626:T:G	peak96390	chr14:34251682-34252017	rs12879626:T:G	1	peak96390
peak61894	chr14:34496707-34498332	rs12892302:T:C	peak96429	chr14:34496783-34497357	rs12892302:T:C	1	peak96429,peak96430,peak96431
peak61997	chr14:35345408-35345703	rs55746125:C:T	peak96561	chr14:35345448-35345683	rs55746125:C:T	1	peak96561
peak61998	chr14:35347336-35347983	rs2093272:C:A	peak96562	chr14:35347393-35347958	rs4624077:G:C	0.891	peak96562
peak62072	chr14:36502542-36503210	rs1956967:G:T	peak96668	chr14:36502616-36503165	rs1956967:G:T	1	peak96668
peak62282	chr14:39447052-39448180	rs10083310:A:C	peak96998	chr14:39447240-39447762	rs10083310:A:C	1	peak96998
peak62302	chr14:40113649-40114291	rs56118548:G:T	peak97036	chr14:40113681-40114000	rs12896201:C:A	0.996	peak97036
peak62345	chr14:41449054-41449471	rs2152902:C:T	peak97110	chr14:41449096-41449377	rs2152902:C:T	1	peak97110
peak626	chr1:6761267-6762712	rs35916265:T:A	peak1396	chr1:6761382-6761866	rs35916265:T:A	1	peak1396,peak1397
peak62709	chr14:50381017-50382498	rs10162481:A:G	peak97704	chr14:50381032-50381413	rs10162313:T:C	0.999	peak97704,peak97705
peak62776	chr14:51077355-51078240	rs11157796:C:T	peak97793	chr14:51077523-51078187	rs11157796:C:T	1	peak97793
peak62779	chr14:51138634-51139787	rs4309324:A:T	peak97800	chr14:51139229-51139684	rs4309324:A:T	1	peak97800
peak63186	chr14:55454189-55455045	rs10129535:C:T	peak98384	chr14:55454480-55454906	rs10129535:C:T	1	peak98384
peak63211	chr14:55790443-55791959	rs17253841:T:G	peak98419	chr14:55790638-55791171	rs17253841:T:G	1	peak98419
peak63239	chr14:56107674-56108435	rs241515:T:G	peak98459	chr14:56107689-56107954	rs241515:T:G	1	peak98459,peak98460
peak63424	chr14:58963755-58964862	rs17095475:A:G	peak98738	chr14:58963873-58964176	rs17095475:A:G	1	peak98738,peak98739
peak63658	chr14:61503057-61503874	rs12589264:T:C	peak99050	chr14:61503182-61503837	rs2245209:C:A	0.988	peak99050
peak63998	chr14:65214660-65215427	rs8016882:T:C	peak99536	chr14:65214722-65215259	rs8016882:T:C	1	peak99536
peak64076	chr14:66501420-66502003	rs8005612:T:C	peak99683	chr14:66501492-66501971	rs8005612:T:C	1	peak99683
[truncated: 440 more rows]

## Sheet: S6 roadmap_overlap_caPeaks
Supplemental Table 6. Percentage of caPeaks (FDR<5%, n=35,361) and non-caPeaks (FastQTL beta-adjusted p>0.5, n=128,525) assigned to each roadmap liver tissue chromatin state.
chromatin_state	percent_caPeaks	percent_non_caPeaks
promoter	11.2	6.7
enhancer	40.9	23.1
transcribed	12.9	16.7
polycomb	7.7	15.6
heterochromatin	1.8	5.2
quiescent	24.7	30.5
ZNF_repeats	0.6	1.9
no_chromatinState_liftedOver	0.3	0.3

## Sheet: S7A sequencing depth downsampli
Supplemental Table 7A. Number of significant caQTLs (FDR<5%) after downsampling sequencing depth to 4 different percentages of total depth. For each downsampled depth, there are 5 technical replicates obtained using different seeds (integers from 1-5) for the random number generator used in samtools. The number of significant caQTLs in the full-depth analysis is 35,361.
downsample_percentage	replicate1	replicate2	replicate3	replicate4	replicate5	Mean
20	15692	15448	15602	15470	15484	15539.2
40	23603	23407	23587	23620	23706	23584.6
60	28707	28728	28655	28733	28715	28707.6
80	32353	32309	32396	32307	32443	32361.6

## Sheet: S7B sample size downsampling
Supplemental Table 7B. Number of significant caQTLs (FDR<5%) after downsampling sample size to 4 different percentages of the total. For each downsampled sample size, there are 5 technical replicates obtained using different seeds (integers from 1-5) for the random number generator used in R. The number of significant caQTLs in the full-depth analysis is 35,361.
downsample_percentage	replicate1	replicate2	replicate3	replicate4	replicate5	Mean
20	2046	2158	1977	1718	2151	2010
40	11993	12411	12309	10831	11634	11835.6
60	19909	20779	20127	19987	19777	20115.8
80	28409	28735	27609	28279	28012	28208.8

[truncated: 21 more sheets: S8 motifDisruption_by_caQTL, S9A coordinatedPeaks, S9B column_descriptions, S10 coordinatedPeaks_peakCount, S11 coordinatePeak_genomicWidth, S12 driverPeak_TF_ChIP_enrich, S13 driverPeak_motifEnrich, S14 targetGenes_TSS_proximity, S15 targetGenes_eQTL, S16 targetGenes_HiC, S17 targetGenes_allMethods, S18 targetGene_tissueSpecific, S19 TF_links_logisticRegression, S20 TF_peak_distQuantiles, S21 eQTL_vs_coordinatedPeaks, S22 LDSC_caPeaks, S23A_GWAS_caQTL_colocalization, S23B colocalization_columns, S24_number_colocalizations, S25 reporter_assay_primers …]
